# Supplementary material for: Which software packages did researchers use to meta-analyze fMRI data? A literature survey from 2019 to 2024
Source: Front Hum Neurosci. 2025 Jul 10;19:1580808. doi: 10.3389/fnhum.2025.1580808 (PMC12287008; doi:10.3389/fnhum.2025.1580808)
Supplement: Supplementary file 1 [file Data_Sheet_1.xlsx]

## Sheet: datasheet
Software: 1=GingerALE; 2=Neurosynth (website); 3=SDM-PSI toolbox; 4=MKDA toolbox; 5=NiMARE; 6=NeuroElf; 7=R; 8=RevMan; 9=Meta-Essentials; 10=NeuroQuery (website); 11=Comprehensive Meta-Analysis; 12=FSL; 13=Excel extension; 14=STATA; 15=BayesFactorFMRI toolbox; 16=NeuRoi toolbox; 17=Script for Author-topic model (ATM, Ngo et al. 2019); 18=Matlab; 19=CluB toolbox; 20=BMACS toolbox; 21=TIFT (Tensor …	Version	Authors	Title	Journal	Volume	Issue	Beginning page	Ending page	Article number	DOI	Publication year	Web of Science or Scopus Accession Number
2	?	Wei, W; Benn, RA; Scholz, R; Shevchenko, V; Klatzmann, U; Alberti, F; Chiou, R; Wassermann, D; Vanderwal, T; Smallwood, J; Margulies, DS	A function-based mapping of sensory integration along the cortical hierarchy	COMMUNICATIONS BIOLOGY	7	1			1593	10.1038/s42003-024-07224-z	2024	WOS:001367068700001
17	?	Ireton, R; Hughes, A; Klabunde, M	A Functional Magnetic Resonance Imaging MetaAnalysis of Childhood Trauma	BIOLOGICAL PSYCHIATRY-COGNITIVE NEUROSCIENCE AND NEUROIMAGING	9	6	561	570		10.1016/j.bpsc.2024.01.009	2024	WOS:001251434600001
4	?	Xia, HS; Hou, YQ; Li, Q; Chen, AT	A meta-analysis of cognitive flexibility in aging: Perspective from functional network and lateralization	HUMAN BRAIN MAPPING	45	14			e70031	10.1002/hbm.70031	2024	WOS:001324664200001
1	3.0.2	Gao D.; Liang X.; Ting Q.; Nichols E.S.; Bai Z.; Xu C.; Cai M.; Liu L.	A meta-analysis of letter–sound integration: Assimilation and accommodation in the superior temporal gyrus	Human Brain Mapping	45	15			e26713	10.1002/hbm.26713	2024	2-s2.0-85207364570
1,19	GingerALE: 3.0.2; CluB: ?	Bonandrini, R; Gornetti, E; Paulesu, E	A meta-analytical account of the functional lateralization of the reading network	CORTEX	177		363	384		10.1016/j.cortex.2024.05.015	2024	WOS:001261603300001
3	?	Yang Z.; Xiao S.; Su T.; Gong J.; Qi Z.; Chen G.; Chen P.; Tang G.; Fu S.Y.; Yan H.; Huang L.; Wang Y.	A multimodal meta-analysis of regional functional and structural brain abnormalities in obsessive–compulsive disorder	European Archives of Psychiatry and Clinical Neuroscience	274	1	165	180		10.1007/s00406-023-01594-x	2024	2-s2.0-85151475489
3	?	Cheng S.; Dong X.; Lai P.; Chen X.; Zhou J.; Li Z.; Wu X.	A Multimodal Meta-Analysis of Structural and Functional Alterations in the Brain of Knee Osteoarthritis	Pain Physician	27	5	E557	E566			2024	2-s2.0-85200282900
3	6.21	Tang, XY; Guo, ZX; Chen, GM; Sun, SL; Xiao, S; Chen, P; Tang, GX; Huang, L; Wang, Y	A Multimodal Meta-Analytical Evidence of Functional and Structural Brain Abnormalities Across Alzheimer's Disease Spectrum	AGEING RESEARCH REVIEWS	95				102240	10.1016/j.arr.2024.102240	2024	WOS:001197657100001
3	5.1	Rao, YW; Ge, LM; Wu, JX	A systematic review and coordinate-based meta-analysis of fMRI studies on acupuncture at LR 3	FRONTIERS IN NEUROSCIENCE	18				1341567	10.3389/fnins.2024.1341567	2024	WOS:001158920000001
7	?	Roheger, M; Grothe, L; Hasselberg, L; Grothe, M; Meinzer, M	A systematic review and meta-analysis of socio-cognitive impairments in multiple sclerose	SCIENTIFIC REPORTS	14	1			7096	10.1038/s41598-024-53750-5	2024	WOS:001191155200004
4	?	Daviddi, S; Yaya, G; Sperduti, M; Santangelo, V	A Systematic Review and Meta-analysis of the Neural Correlates of Direct vs. Generative Retrieval of Episodic Autobiographical Memory	NEUROPSYCHOLOGY REVIEW						10.1007/s11065-024-09653-3	2024	WOS:001372751400001
3	6.22	Fortier, A; Dumais, A; Boisvert, M; Zouaoui, I; Chung, CF; Potvin, S	Aberrant activity at rest of the associative striatum in schizophrenia: Meta-analyses of the amplitude of low frequency fluctuations	JOURNAL OF PSYCHIATRIC RESEARCH	179		117	132		10.1016/j.jpsychires.2024.09.012	2024	WOS:001317324300001
3	?	Shuai, YB; Wang, BH; Zhang, XM; Shen, ZX; Han, SB; Zhou, C	Aberrant intrinsic brain activities in functional gastrointestinal disorders revealed by seed-based d mapping with permutation of subject images	FRONTIERS IN NEUROSCIENCE	18				1452216	10.3389/fnins.2024.1452216	2024	WOS:001366025000001
1	3.0.2	Zhang J.; Wu X.; Si Y.; Liu Y.; Wang X.; Geng Y.; Chang Q.; Jiang X.; Zhang H.	Abnormal caudate nucleus activity in patients with depressive disorder: Meta-analysis of task-based functional magnetic resonance imaging studies with behavioral domain	Psychiatry Research - Neuroimaging	338				111769	10.1016/j.pscychresns.2023.111769	2024	2-s2.0-85180562732
3	5.15	Wang R.; Lu L.; Gao Y.; Qiu H.; Xu H.; Huang J.; Sweeney J.A.; Gong Q.; Strawn J.R.	Abnormal neural activation during negative emotion processing in anxiety disorders: a coordinate-based meta-analysis	CNS Spectrums						10.1017/S1092852924000166	2024	2-s2.0-85192714185
3	5.15	Cheng, LL; Zhang, JX; Xi, HY; Li, MT; Hu, S; Yuan, WT; Wang, P; Chen, LF; Zhan, LL; Jia, XZ	Abnormalities of brain structure and function in cervical spondylosis: a multi-modal voxel-based meta-analysis	FRONTIERS IN NEUROSCIENCE	18				1415411	10.3389/fnins.2024.1415411	2024	WOS:001258069300001
1	3.0.2	Istomina, A; Arsalidou, M	Add, subtract and multiply: Meta-analyses of brain correlates of arithmetic operations in children and adults	DEVELOPMENTAL COGNITIVE NEUROSCIENCE	69				101419	10.1016/j.dcn.2024.101419	2024	WOS:001288787300001
1,3	GingerALE: ?; SDM-PSI: 5.141	Zhang, Q; Hou, YZ; Ding, H; Shu, YP; Li, J; Chen, XZ; Li, JL; Lou, Q; Wang, DX	Alterations of sleep deprivation on brain function: A coordinate-based resting-state functional magnetic resonance imaging meta-analysis	WORLD JOURNAL OF PSYCHIATRY	14	2				10.5498/wjp.v14.i2.315	2024	WOS:001184365100004
8	5.4.1	Sobeeh, MG; Benmelouka, A; Metwally, E; Abuhassira, MJ; Abdeljalil, AM; Nasr, SA; El-Helw, GO; Doheim, MF	Altered brain function and structure in carpal tunnel syndrome: a systematic review and meta-analysis of structural and functional brain imaging	BRAIN STRUCTURE & FUNCTION	229	2	257	272		10.1007/s00429-023-02737-5	2024	WOS:001132811000001
2	?	Gai, Q; Chu, TP; Li, QH; Guo, YT; Ma, H; Shi, YH; Che, KL; Zhao, F; Dong, FH; Li, YA; Xie, HZ; Mao, N	Altered intersubject functional variability of brain white-matter in major depressive disorder and its association with gene expression profiles	HUMAN BRAIN MAPPING	45	5			e26670	10.1002/hbm.26670	2024	WOS:001193311800001
1	3.0.2	Qiu, ZQ; Zhong, XK; Yang, QM; Shi, XR; He, LB; Zhou, HL; Xu, XX	Altered spontaneous brain activity in lumbar disc herniation patients: insights from an ALE meta-analysis of neuroimaging data	FRONTIERS IN NEUROSCIENCE	18				1349512	10.3389/fnins.2024.1349512	2024	WOS:001165261700001
2,3	Neurosynth: ?; SDM-PSI: 6.21	Liloia D.; Manuello J.; Costa T.; Keller R.; Nani A.; Cauda F.	Atypical local brain connectivity in pediatric autism spectrum disorder? A coordinate-based meta-analysis of regional homogeneity studies	European Archives of Psychiatry and Clinical Neuroscience	274	1	3	18		10.1007/s00406-022-01541-2	2024	2-s2.0-85145599292
1	3.0.2	Hua Z.; Hu J.; Zeng H.; Li J.; Cao Y.; Gan Y.	Auditory language comprehension among children and adolescents with autism spectrum disorder: An ALE meta-analysis of fMRI studies	Autism Research	17	3	482	496		10.1002/aur.3055	2024	2-s2.0-85178185996
3	6.21	Fiorito, AM; Blasi, G; Brunelin, J; Chowdury, A; Diwadkar, VA; Goghari, VM; Gur, RC; Kwon, JS; Quarto, T; Rolland, B; Spilka, MJ; Wolf, DH; Yun, JY; Fakra, E; Sescousse, G	Blunted brain responses to neutral faces in healthy first-degree relatives of patients with schizophrenia: an image-based fMRI meta-analysis	SCHIZOPHRENIA	10	1			38	10.1038/s41537-024-00452-6	2024	WOS:001189173900001
3	6.21	Schurz, M; Berenz, JP; Maerz, J; Perla, R; Buchheim, A; Labek, K	Brain Activation for Social Cognition and Emotion Processing Tasks in Borderline Personality Disorder: A Meta-Analysis of Neuroimaging Studies	BRAIN SCIENCES	14	4			395	10.3390/brainsci14040395	2024	WOS:001220382700001
1	3.0.2	Rajiah R.; Takahashi K.; Aziz Q.; Ruffle J.K.	Brain effect of transcutaneous vagal nerve stimulation: A meta-analysis of neuroimaging evidence	Neurogastroenterology and Motility	36	8			e14484	10.1111/nmo.14484	2024	2-s2.0-85140359700
1	3.0.2	Torres-Morales C.; Cansino S.	Brain representations of space and time in episodic memory: A systematic review and meta-analysis	Cognitive, Affective and Behavioral Neuroscience	24	1	1	18		10.3758/s13415-023-01140-1	2024	2-s2.0-85177818793
1	2.3.6	Li, Q; Lai, XY; Li, T; Madsen, KH; Xiao, J; Hu, KS; Feng, CL; Fu, D; Liu, X	Brain responses to self- and other- unfairness under resource distribution context: Meta-analysis of fMRI studies	NEUROIMAGE	297					10.1016/j.neuroimage.2024.120707	2024	WOS:001266425100001
2	?	Kong, Q; Li, TT; Reddy, S; Hodges, S; Kong, J	Brain stimulation targets for chronic pain: Insights from meta-analysis, functional connectivity and literature review	NEUROTHERAPEUTICS	21	1			e00297	10.1016/j.neurot.2023.10.007	2024	WOS:001223403400001
7	4.3.1	Al-Shama, RFM; Uleman, JF; Pereira, M; Claassen, JAHR; Dresler, M	Cerebral blood flow in sleep: A systematic review and meta-analysis	SLEEP MEDICINE REVIEWS	77				101977	10.1016/j.smrv.2024.101977	2024	WOS:001288555400001
10	?	Turner M.; Belli A.; Castellani R.J.	Changes in Brain Structure and Function in a Multisport Cohort of Retired Female and Male Athletes, Many Years after Suffering a Concussion: Implications for Neuroplasticity and Neurodegenerative Disease Pathogenesis	Journal of Alzheimer's Disease Reports	8	1	501	516		10.3233/ADR-240021	2024	2-s2.0-85188785461
1	3.0.2	Ru D.; Zhang J.; Wei L.; Zhang Z.; Wang Y.; Zhou F.; Wu G.; Yuan Q.; Du Z.; Wang E.; Hu J.	Clinical Insights Into Default Mode Network Abnormalities in Mild Traumatic Brain Injury: Unraveling Axonal Injury Through Functional, Structural, and Molecular Analyses	CNS Neuroscience and Therapeutics	30	12			e70188	10.1111/cns.70188	2024	2-s2.0-85212982376
1	3.0.2	Mattavelli G.; Gorrino I.; Tornaghi D.; Canessa N.	Cognitive and motor impulsivity in the healthy brain, and implications for eating disorders and obesity: A coordinate-based meta-analysis and systematic review	Cortex	171		90	112		10.1016/j.cortex.2023.10.008	2024	2-s2.0-85177054524
1	3.0.2	Gerosa, M; Canessa, N; Morawetz, C; Mattavelli, G	Cognitive reappraisal of food craving and emotions: a coordinate-based meta-analysis of fMRI studies	SOCIAL COGNITIVE AND AFFECTIVE NEUROSCIENCE	19	1			nsad077	10.1093/scan/nsad077	2024	WOS:001138673900002
3	?	Qin K.; Pan N.; Lei D.; Zhang F.; Yu Y.; Sweeney J.A.; DelBello M.P.; Gong Q.	Common and distinct neural correlates of emotional processing in individuals at familial risk for major depressive disorder and bipolar disorder: A comparative meta-analysis	Journal of Affective Disorders	348		97	106		10.1016/j.jad.2023.12.030	2024	2-s2.0-85180578667
3	?	Bore, MC; Liu, XQ; Huang, XQ; Kendrick, KM; Zhou, B; Zhang, J; Klugah-Brown, B; Becker, B	Common and separable neural alterations in adult and adolescent depression - Evidence from neuroimaging meta-analyses	NEUROSCIENCE AND BIOBEHAVIORAL REVIEWS	164				105835	10.1016/j.neubiorev.2024.105835	2024	WOS:001287509000001
1	3.0.2	Sulpizio, V; Teghil, A; Pitzalis, S; Boccia, M	Common and specific activations supporting optic flow processing and navigation as revealed by a meta-analysis of neuroimaging studies	BRAIN STRUCTURE & FUNCTION	229	5	1021	1045		10.1007/s00429-024-02790-8	2024	WOS:001199189900001
3	?	Zhao, XH; Wu, SY; Li, X; Liu, ZW; Lu, WC; Lin, KG; Shao, RB	Common neural deficits across reward functions in major depression: a meta-analysis of fMRI studies	PSYCHOLOGICAL MEDICINE	54	11	2794	2806		10.1017/S0033291724001235	2024	WOS:001229051900001
1,2	GingerALE: ?; Neurosynth: 0.6	Feng C.; Liu Q.; Huang C.; Li T.; Wang L.; Liu F.; Eickhoff S.B.; Qu C.	Common neural dysfunction of economic decision-making across psychiatric conditions	NeuroImage	294				120641	10.1016/j.neuroimage.2024.120641	2024	2-s2.0-85193235510
2	?	Lee, JN; Kumar, VA; Teo, JM; Eldaya, RW; Hou, P; Noll, KR; Ferguson, SD; Prabhu, SS; Liu, HL	Comparative analysis of brain language templates with primary language areas detected from presurgical fMRI of brain tumor patients	BRAIN AND BEHAVIOR	14	6			e3497	10.1002/brb3.3497	2024	WOS:001250027500001
3	?	Pan, ZZ; Qi, HY; Zhou, J; Xu, YH	Comparison of Brain Function and Structure in Patients with Major Depression: A Systematic Review and Meta-Analysis of MRI-Based Data	ACTAS ESPANOLAS DE PSIQUIATRIA	52	4	561	570		10.62641/aep.v52i4.1636	2024	WOS:001287656500021
1	3.0.2	Costa, C; Pezzetta, R; Masina, F; Lago, S; Gastaldon, S; Frangi, C; Genon, S; Arcara, G; Scarpazza, C	Comprehensive investigation of predictive processing: A cross- and within-cognitive domains fMRI meta-analytic approach	HUMAN BRAIN MAPPING	45	12			e26817	10.1002/hbm.26817	2024	WOS:001295551100001
1	3.0.2	Rong D.; Hu C.-P.; Yang J.; Guo Z.; Liu W.; Yu M.	Consistent abnormal activity in the putamen by dopamine modulation in Parkinson's disease: A resting-state neuroimaging meta-analysis	Brain Research Bulletin	210				110933	10.1016/j.brainresbull.2024.110933	2024	2-s2.0-85188543612
2	?	Luppi, AI; Singleton, SP; Hansen, JY; Jamison, KW; Bzdok, D; Kuceyeski, A; Betzel, RF; Misic, B	Contributions of network structure, chemoarchitecture and diagnostic categories to transitions between cognitive topographies	NATURE BIOMEDICAL ENGINEERING	8	9				10.1038/s41551-024-01242-2	2024	WOS:001283878100001
1	3.0.2	Yu, JP; Xu, QW; Ma, L; Huang, YQ; Zhu, WJ; Liang, Y; Wang, YZ; Tang, WX; Zhu, C; Jiang, XY	Convergent functional change of frontoparietal network in obsessive-compulsive disorder: a voxel-based meta-analysis	FRONTIERS IN PSYCHIATRY	15				1401623	10.3389/fpsyt.2024.1401623	2024	WOS:001272999600001
3	?	Guo Z.; Sun S.; Xiao S.; Chen G.; Chen P.; Yang Z.; Tang X.; Huang L.; Wang Y.	COVID-19 is associated with changes in brain function and structure: A multimodal meta-analysis of neuroimaging studies	Neuroscience and Biobehavioral Reviews	164				105792	10.1016/j.neubiorev.2024.105792	2024	2-s2.0-85198024224
3	5.15	Liloia, D; Zamfira, DA; Tanaka, M; Manuello, J; Crocetta, A; Keller, R; Cozzolino, M; Duca, S; Cauda, F; Costa, T	Disentangling the role of gray matter volume and concentration in autism spectrum disorder: A meta-analytic investigation of 25 years of voxel-based morphometry research	NEUROSCIENCE AND BIOBEHAVIORAL REVIEWS	164				105791	10.1016/j.neubiorev.2024.105791	2024	WOS:001349036200001
1	3.0.2	Wu, Y; Zhong, Y; Zhang, G; Wang, C; Zhang, N; Chen, QR	Distinct functional patterns in child and adolescent bipolar and unipolar depression during emotional processing	CEREBRAL CORTEX	34	1			bhad461	10.1093/cercor/bhad461	2024	WOS:001158366600093
3	6.21	Bore M.C.; Liu X.; Gan X.; Wang L.; Xu T.; Ferraro S.; Li L.; Zhou B.; Zhang J.; Vatansever D.; Biswal B.; Klugah-Brown B.; Becker B.	Distinct neurofunctional alterations during motivational and hedonic processing of natural and monetary rewards in depression - A neuroimaging meta-analysis	Psychological Medicine	54	4	639	651		10.1017/S0033291723003410	2024	2-s2.0-85179096700
2	?	Li J.; Wang D.; Xia J.; Zhang C.; Meng Y.; Xu S.; Chen H.; Liao W.	Divergent suicidal symptomatic activations converge on somato-cognitive action network in depression	Molecular Psychiatry	29	7	1980	1989		10.1038/s41380-024-02450-7	2024	2-s2.0-85185105281
1	2.3.6	Gronchi, G; Gavazzi, G; Viggiano, MP; Giovannelli, F	Dual-Process Theory of Thought and Inhibitory Control: An ALE Meta-Analysis	BRAIN SCIENCES	14	1			101	10.3390/brainsci14010101	2024	WOS:001149462700001
5	?	Levitas, DJ; James, TW	Dynamic threat-reward neural processing under semi-naturalistic ecologically relevant scenarios	HUMAN BRAIN MAPPING	45	4			e26648	10.1002/hbm.26648	2024	WOS:001178647500001
1,11	?	Xiao, Y; Dong, S; Pan, CY; Guo, HL; Tang, LL; Zhang, XZ; Wang, F	Effectiveness of non-invasive brain stimulation on depressive symptoms targeting prefrontal cortex in functional magnetic resonance imaging studies: a combined systematic review and meta-analysis	PSYCHORADIOLOGY	4				kkae025	10.1093/psyrad/kkae025	2024	WOS:001389465200001
23	?	Stephenson, C; Philipp-Müller, A; Moghimi, E; Nashed, JY; Cook, DJ; Shirazi, A; Milev, R; Alavi, N	Effects of cognitive behavioural therapy and exposure-response prevention on brain activation in obsessive-compulsive disorder patients: systematic review and meta-analysis	EUROPEAN ARCHIVES OF PSYCHIATRY AND CLINICAL NEUROSCIENCE						10.1007/s00406-024-01852-6	2024	WOS:001257016900002
1	3.0.2	Fan, C; Wu, MJ; Liu, H; Chen, XL; Gao, Z; Zhao, X; Zhou, JH; Jiang, Z	Effects of meditation on neural responses to pain: A systematic review and meta-analysis of fMRI studies	NEUROSCIENCE AND BIOBEHAVIORAL REVIEWS	162				105735	10.1016/j.neubiorev.2024.105735	2024	WOS:001247437100001
3	?	Aarts I.; Thorsen A.L.; Vriend C.; Planting C.; van den Heuvel O.A.; Thomaes K.	Effects of psychotherapy on brain activation during negative emotional processing in patients with posttraumatic stress disorder: a systematic review and meta-analysis	Brain Imaging and Behavior	18	2	444	455		10.1007/s11682-023-00831-0	2024	2-s2.0-85178396277
8	5.3	Zhu T.; Zhou Y.; Dai A.; Li S.; Zhou L.; Zhang X.; Zhang W.; Shi J.	Efficacy of acupuncture and rehabilitation therapy on brain function activation area and neurological function in ischemic stroke: A systematic review and meta-analysis	PLoS ONE	19	2025-02-02			e0298547	10.1371/journal.pone.0298547	2024	2-s2.0-85185790174
1	3.0.2	Zeng, YH; Ye, ZJ; Zheng, WX; Wang, J	Efficacy of Cerebellar Transcranial Magnetic Stimulation for Post-stroke Balance and Limb Motor Function Impairments: Meta-analyses of Random Controlled Trials and Resting-State fMRI Studies	CEREBELLUM	23	4	1678	1696		10.1007/s12311-024-01660-7	2024	WOS:001150548800001
1	3.0.2	Perron, M; Vuong, V; Grassi, MW; Imran, A; Alain, C	Engagement of the speech motor system in challenging speech perception: Activation likelihood estimation meta-analyses	HUMAN BRAIN MAPPING	45	13			e70023	10.1002/hbm.70023	2024	WOS:001310655900001
3	6.21	Rupert P.E.; Pogue-Geile M.	Familial Risk for Schizophrenia vs Bipolar Disorder and Task-Based Neural Activation: A functional Magnetic Resonance Imaging Meta-Analysis	Schizophrenia Bulletin	50	1	177	186		10.1093/schbul/sbad115	2024	2-s2.0-85181395125
1	2.3.6	Boyland E.; Maden M.; Coates A.E.; Masterson T.D.; Alblas M.C.; Bruce A.S.; Roberts C.A.	Food and non-alcoholic beverage marketing in children and adults: A systematic review and activation likelihood estimation meta-analysis of functional magnetic resonance imaging studies	Obesity Reviews	25	1			e13643	10.1111/obr.13643	2024	2-s2.0-85173070106
2	?	Meng, J; Zhang, T; Hao, T; Xie, XH; Zhang, MD; Zhang, L; Wan, XS; Zhu, CY; Li, QQ; Wang, K	Functional and Structural Abnormalities in the Pain Network of Generalized Anxiety Disorder Patients with Pain Symptoms	NEUROSCIENCE	543		28	36		10.1016/j.neuroscience.2024.02.006	2024	WOS:001236898500001
1	3.0.2	Cai, H; Dong, J; Mei, LL; Feng, GY; Li, LL; Wang, G; Yan, H	Functional and structural abnormalities of the speech disorders: a multimodal activation likelihood estimation meta-analysis	CEREBRAL CORTEX	34	3			bhae075	10.1093/cercor/bhae075	2024	WOS:001184929500007
1	3.0.2	Zouki, JJ; Eapen, V; Efron, D; Maxwell, A; Corp, DT; Silk, TJ	Functional brain networks associated with the urge for action: Implications for pathological urge	NEUROSCIENCE AND BIOBEHAVIORAL REVIEWS	163				105779	10.1016/j.neubiorev.2024.105779	2024	WOS:001266672000001
3	5.15	Jiang, YR; Zhou, YJ; Xie, YY; Zhou, JZ; Cai, MJ; Tang, J; Liu, F; Ma, JW; Liu, HG	Functional magnetic resonance imaging alternations in suicide attempts individuals and their association with gene expression	NEUROIMAGE-CLINICAL	43				103645	10.1016/j.nicl.2024.103645	2024	WOS:001281393900001
8	5.3	Xiong, LQ; Ma, LL; Shi, LY; Pan, NN; Ai, K; Zhao, JX; He, DL; Hang, G	Functional magnetic resonance imaging for staging chronic kidney disease: a systematic review and meta-analysis	INTERNATIONAL UROLOGY AND NEPHROLOGY	56	9	2971	2981		10.1007/s11255-024-04055-z	2024	WOS:001204610300002
2	?	Wang, XT; Nie, X; Zhang, F; Wei, YH; Zeng, WT; Zhang, YC; Lin, HX	Functional magnetic resonance imaging of depression: a bibliometrics and meta-analysis	ANNALS OF GENERAL PSYCHIATRY	23	1			39	10.1186/s12991-024-00525-x	2024	WOS:001340643800001
3	6.21	Nan, X; Li, WL; Wang, L	Functional magnetic resonance imaging studies in bipolar disorder in resting state: A coordinates-based meta-analysis	PSYCHIATRY RESEARCH-NEUROIMAGING	344				111869	10.1016/j.pscychresns.2024.111869	2024	WOS:001298624200001
2	?	Mohamed, AZ; Kwiatek, R; Del Fante, P; Calhoun, VD; Lagopoulos, J; Shan, ZY	Functional MRI of the Brainstem for Assessing Its Autonomic Functions: From Imaging Parameters and Analysis to Functional Atlas	JOURNAL OF MAGNETIC RESONANCE IMAGING	60	5	1880	1891		10.1002/jmri.29286	2024	WOS:001160807900001
1	?	Wang Y.; Yang Y.; Xu W.; Yao X.; Xie X.; Zhang L.; Sun J.; Wang L.; Hua Q.; He K.; Tian Y.; Wang K.; Ji G.-J.	Heterogeneous Brain Abnormalities in Schizophrenia Converge on a Common Network Associated With Symptom Remission	Schizophrenia Bulletin	50	3	545	556		10.1093/schbul/sbae003	2024	2-s2.0-85186742122
3	6.22	Cai, MJ; Ji, Y; Zhao, QY; Xue, H; Sun, ZH; Wang, H; Zhang, YJ; Chen, YY; Zhao, Y; Zhang, YJ; Lei, MH; Wang, CY; Zhuo, CJ; Liu, NN; Liu, HG; Liu, F	Homotopic functional connectivity disruptions in schizophrenia and their associated gene expression	NEUROIMAGE	289				120551	10.1016/j.neuroimage.2024.120551	2024	WOS:001188519200001
1	3.0.2	Watanuki, S	Identifying distinctive brain regions related to consumer choice behaviors on branded foods using activation likelihood estimation and machine learning	FRONTIERS IN COMPUTATIONAL NEUROSCIENCE	18				1310013	10.3389/fncom.2024.1310013	2024	WOS:001153999500001
1	3.0.2	Zhang, Y; Lu, H; Ren, XS; Zhang, JF; Wang, Y; Zhang, CH; Zhao, XF	Immediate and long-term brain activation of acupuncture on ischemic stroke patients: an ALE meta-analysis of fMRI studies	FRONTIERS IN NEUROSCIENCE	18				1392002	10.3389/fnins.2024.1392002	2024	WOS:001282743500001
1	3.0.2	Yang, YH; Wang, C; Shi, JN; Zou, ZL	Joyful growth vs. compulsive hedonism: A meta-analysis of brain activation on romantic love and addictive disorders	NEUROPSYCHOLOGIA	204				109003	10.1016/j.neuropsychologia.2024.109003	2024	WOS:001324407800001
22	?	Grot, S; Smine, S; Potvin, S; Darcey, M; Pavlov, V; Genon, S; Nguyen, H; Orban, P	Label-based meta-analysis of functional brain dysconnectivity across mood and psychotic disorders	PROGRESS IN NEURO-PSYCHOPHARMACOLOGY & BIOLOGICAL PSYCHIATRY	131				110950	10.1016/j.pnpbp.2024.110950	2024	WOS:001185653100001
1	3.0.2	Cacciante L.; Pregnolato G.; Salvalaggio S.; Federico S.; Kiper P.; Smania N.; Turolla A.	Language and gesture neural correlates: A meta-analysis of functional magnetic resonance imaging studies	International Journal of Language and Communication Disorders	59	3	902	912		10.1111/1460-6984.12987	2024	2-s2.0-85176931127
18	?	Wang, L; Li, T; Gu, RL; Feng, CL	Large-scale meta-analyses and network analyses of neural substrates underlying human escalated aggression	NEUROIMAGE	299				120824	10.1016/j.neuroimage.2024.120824	2024	WOS:001316647600001
5	0.1.0	Yang T.; Fan X.; Hou B.; Wang J.; Chen X.	Linguistic network in early deaf individuals: A neuroimaging meta-analysis	NeuroImage	299				120720	10.1016/j.neuroimage.2024.120720	2024	2-s2.0-85203794812
1,2	GingerALE: 3.0.2; Neurosynth: ?	Costa, T; Premi, E; Borroni, B; Manuello, J; Cauda, F; Duca, S; Liloia, D	Local functional connectivity abnormalities in mild cognitive impairment and Alzheimer's disease: A meta-analytic investigation using minimum Bayes factor activation likelihood estimation	NEUROIMAGE	298				120798	10.1016/j.neuroimage.2024.120798	2024	WOS:001298257600001
1	2.3	Pilon F.; Boisvert M.; Potvin S.	Losing the chain of thought: A meta-analysis of functional neuroimaging studies using verbal tasks in schizophrenia	Journal of Psychiatric Research	169		238	246		10.1016/j.jpsychires.2023.11.013	2024	2-s2.0-85178132157
14	14.2	Ghaderi, S; Mohammadi, M; Sayehmiri, F; Mohammadi, S; Tavasol, A; Rezaei, M; Ghalyanchi-Langeroudi, A	Machine Learning Approaches to Identify Affected Brain Regions in Movement Disorders Using MRI Data: A Systematic Review and Diagnostic Meta-analysis	JOURNAL OF MAGNETIC RESONANCE IMAGING	60	6	2518	2546		10.1002/jmri.29364	2024	WOS:001192096700001
16	?	Briley P.M.; Webster L.; Boutry C.; Oh H.; Auer D.P.; Liddle P.F.; Morriss R.	Magnetic resonance imaging connectivity features associated with response to transcranial magnetic stimulation in major depressive disorder	Psychiatry Research - Neuroimaging	342				111846	10.1016/j.pscychresns.2024.111846	2024	2-s2.0-85196527107
3	6.22	Li M.; Mu B.; Li M.; Zhang X.; Zhang J.; Huang H.; Wang H.	Magnetic resonance imaging studies on acupuncture therapy in cerebral ischemic stroke: A systematic review	Heliyon	10	20			e39059	10.1016/j.heliyon.2024.e39059	2024	2-s2.0-85206932690
7	2.10.13	Di Camillo F.; Grimaldi D.A.; Cattarinussi G.; Di Giorgio A.; Locatelli C.; Khuntia A.; Enrico P.; Brambilla P.; Koutsouleris N.; Sambataro F.	Magnetic resonance imaging–based machine learning classification of schizophrenia spectrum disorders: a meta-analysis	Psychiatry and Clinical Neurosciences	78	12	732	743		10.1111/pcn.13736	2024	2-s2.0-85204043202
1	3.0.2	Kim, H	Material-common and material-specific neural activity during encoding of words and scenes: A neuroimaging meta-analysis	BRAIN RESEARCH	1829				148794	10.1016/j.brainres.2024.148794	2024	WOS:001186988100001
1	3.0.2	Li Q.; Kim S.	Meta-analysis of fMRI studies related to mathematical creativity	Frontiers in Psychology	15				1400328	10.3389/fpsyg.2024.1400328	2024	2-s2.0-85216995040
3	?	Zhang, Q; Ding, H	Meta-analysis of resting-state fMRI in cervical spondylosis patients using AES-SDM	FRONTIERS IN NEUROLOGY	15				1439939	10.3389/fneur.2024.1439939	2024	WOS:001330861300001
3	5.15	Mei, BH; Tao, QY; Dang, JH; Niu, XY; Sun, JP; Zhang, MZ; Wang, WJ; Han, SQ; Zhang, Y; Cheng, JL	Meta-analysis of structural and functional abnormalities in behavioral addictions	ADDICTIVE BEHAVIORS	157				108088	10.1016/j.addbeh.2024.108088	2024	WOS:001260843200001
3	6.23	Wang, L; Liu, RS; Liao, J; Xiong, X; Xia, LF; Wang, WW; Liu, JQ; Zhao, FL; Zhuo, LH; Li, HW	Meta-analysis of structural and functional brain abnormalities in early-onset schizophrenia	FRONTIERS IN PSYCHIATRY	15				1465758	10.3389/fpsyt.2024.1465758	2024	WOS:001306059700001
14	20	Zheng, HL; Tian, L; Cai, JH	Meta-analysis of the diagnostic value of functional magnetic resonance imaging for distinguishing unresponsive wakefulness syndrome/vegetative state and minimally conscious state	FRONTIERS IN NEUROSCIENCE	18				1395639	10.3389/fnins.2024.1395639	2024	WOS:001318779400001
1	3.0.2	Cauda, F; Manuello, J; Crocetta, A; Duca, S; Costa, T; Liloia, D	Meta-analytic connectivity perturbation analysis (MACPA): a new method for enhanced precision in fMRI connectivity analysis	BRAIN STRUCTURE & FUNCTION	230	1			17	10.1007/s00429-024-02867-4	2024	WOS:001392167500001
5	?	Markett S.; Boeken O.J.; Wudarczyk O.A.	Multimodal imaging investigation of structural rich club alterations in Alzheimer's disease and mild cognitive impairment: Amyloid deposition, structural atrophy, and functional activation differences	European Journal of Neuroscience	60	3	4169	4181		10.1111/ejn.16384	2024	2-s2.0-85193917984
3	?	Lyu, C; Lyu, X; Gong, QY; Gao, B; Wang, YM	Neural activation signatures in individuals with subclinical depression: A task-fMRI meta-analysis	JOURNAL OF AFFECTIVE DISORDERS	362		104	113		10.1016/j.jad.2024.06.040	2024	WOS:001264310300001
19	?	Arrigoni, E; Antoniotti, P; Bellocchio, V; Veronelli, L; Corbo, M; Pisoni, A	Neural alterations underlying executive dysfunction in Parkinson's disease: A systematic review and coordinate-based meta-analysis of functional neuroimaging studies.	AGEING RESEARCH REVIEWS	95				102207	10.1016/j.arr.2024.102207	2024	WOS:001183583600001
1,2	GingerALE: 3.0.2; Neurosynth: ?	Lee, MM; Stoodley, CJ	Neural bases of reading fluency: A systematic review and meta-analysis	NEUROPSYCHOLOGIA	202				108947	10.1016/j.neuropsychologia.2024.108947	2024	WOS:001269262300001
3	5.15	Zhong S.; Lin J.; Zhang L.; Wang S.; Kemp G.J.; Li L.; Gong Q.	Neural correlates of harm avoidance: a multimodal meta-analysis of brain structural and resting-state functional neuroimaging studies	Translational Psychiatry	14	1			384	10.1038/s41398-024-03091-8	2024	2-s2.0-85204421329
1	3.0.2	Bellmann, OT; Asano, R	Neural correlates of musical timbre: an ALE meta-analysis of neuroimaging data	FRONTIERS IN NEUROSCIENCE	18				1373232	10.3389/fnins.2024.1373232	2024	WOS:001258345600001
3	?	Pacheco-Barrios K.; Heemels R.E.; Martinez-Magallanes D.; Daibes M.; Naqui-Xicota C.; Andrade M.; Fregni F.	Neural correlates of phantom motor execution: A functional neuroimaging systematic review and meta-analysis	Cortex	181		295	304		10.1016/j.cortex.2024.09.001	2024	2-s2.0-85205142027
3	5.15	Yang X.; Song Y.; Zou Y.; Li Y.; Zeng J.	Neural correlates of prediction error in patients with schizophrenia: evidence from an fMRI meta-analysis	Cerebral Cortex	34	1			bhad471	10.1093/cercor/bhad471	2024	2-s2.0-85182754190
1	3.0.2	Wang, YW; Yao, XQ	Neural correlates of willingness to pay for items: A meta-analysis of functional magnetic resonance imaging studies	PHYSIOLOGY & BEHAVIOR	278				114481	10.1016/j.physbeh.2024.114481	2024	WOS:001220979800001
1,2	2.3.6	Zhang, Y; Fu, JJ; Zhao, X	Neural correlates of working memory training: An fMRI meta-analysis	NEUROIMAGE	301				120885	10.1016/j.neuroimage.2024.120885	2024	WOS:001336424600001
3	?	Yao, YH; Zhang, SF; Wang, BY; Lin, XY; Zhao, GF; Deng, H; Chen, Y	Neural dysfunction underlying working memory processing at different stages of the illness course in schizophrenia: a comparative meta-analysis	CEREBRAL CORTEX	34	7			bhae267	10.1093/cercor/bhae267	2024	WOS:001261029500001
1	3.0.2	Li, DX; Wang, DY; Zhou, YH; Zhang, Y; Yang, SY; Dong, X; Cai, SJ; Zhang, RT	Neural effects of acupuncture on stroke patients with motor dysfunction: an activation likelihood estimation meta-analysis	FRONTIERS IN NEUROLOGY	15				1453935	10.3389/fneur.2024.1453935	2024	WOS:001331429000001
1	3.0.2	Dai, SC; Liu, Q; Chai, H; Zhang, WJ	Neural mechanisms of different types of envy: a meta-analysis of activation likelihood estimation methods for brain imaging	FRONTIERS IN PSYCHOLOGY	15				1335548	10.3389/fpsyg.2024.1335548	2024	WOS:001194836200001
1	3.0.2	Fascher M.; Nowaczynski S.; Spindler C.; Strobach T.; Muehlhan M.	Neural underpinnings of response inhibition in substance use disorders: weak meta-analytic evidence for a widely used construct	Psychopharmacology	241	1	1	17		10.1007/s00213-023-06498-1	2024	2-s2.0-85177423917
5	?	Scarfo S.; Marsella A.M.A.; Grigoriadou L.; Moshfeghi Y.; McGeown W.J.	Neuroanatomical correlates and predictors of psychotic symptoms in Alzheimer's disease: A systematic review and meta-analysis	Neuropsychologia	204				109006	10.1016/j.neuropsychologia.2024.109006	2024	2-s2.0-85205524426
1,3	GingerALE: 3.0.2; SDM-PSI: ?	Hazelton J.L.; Carneiro F.; Maito M.; Richter F.; Legaz A.; Altschuler F.; Cubillos-Pinilla L.; Chen Y.; Doherty C.P.; Baez S.; Ibáñez A.	Neuroimaging Meta-Analyses Reveal Convergence of Interoception, Emotion, and Social Cognition Across Neurodegenerative Diseases	Biological Psychiatry	97	11	1079	1090		10.1016/j.biopsych.2024.10.013	2024	2-s2.0-85213050044
3	?	Pan N.; Ma T.; Liu Y.; Zhang S.; Hu S.; Shekara A.; Cao H.; Gong Q.; Chen Y.	Overlapping and differential neuropharmacological mechanisms of stimulants and nonstimulants for attention-deficit/hyperactivity disorder: A comparative neuroimaging analysis	Psychological Medicine	54	16	4676	4690		10.1017/S003329172400285X	2024	2-s2.0-85215964458
1	3.0.2	Boisvert, M; Dugre, JR; Potvin, S	Patterns of abnormal activations in severe mental disorders a transdiagnostic data-driven meta-analysis of task-based fMRI studies	PSYCHOLOGICAL MEDICINE	54	13	3612	3623		10.1017/S003329172400165X	2024	WOS:001330908700001
3	5.15	Wu, BL; Zhang, X; Xie, HS; Zhang, BS; Ling, YX; Gan, RQ; Qiu, LH; Roberts, N; Jia, ZY; Gong, QY	Research Review: Shared and distinct structural and functional brain alterations in adolescents with major depressive disorder' - a multimodal meta-analysis	JOURNAL OF CHILD PSYCHOLOGY AND PSYCHIATRY						10.1111/jcpp.14104	2024	WOS:001383595100001
3	6.22	Zhang, Z	Resting-state functional abnormalities in ischemic stroke: a meta-analysis of fMRI studies	BRAIN IMAGING AND BEHAVIOR	18	6	1569	1581		10.1007/s11682-024-00919-1	2024	WOS:001307295000001
2	?	Hardee, JE; Weigard, AS; Heitzeg, MM; Martz, ME; Cope, LM	Sex differences in distributed error-related neural activation in problem-drinking young adults	DRUG AND ALCOHOL DEPENDENCE	263				112421	10.1016/j.drugalcdep.2024.112421	2024	WOS:001305631600001
3	5.15	Wang, YX; Li, Q; Yao, L; He, N; Tang, YY; Chen, LZ; Long, FH; Chen, YF; Kemp, GJ; Lui, S; Li, F	Shared and differing functional connectivity abnormalities of the default mode network in mild cognitive impairment and Alzheimer's disease	CEREBRAL CORTEX	34	3			bhae094	10.1093/cercor/bhae094	2024	WOS:001273404300001
99		Tamon, H; Fujino, J; Itahashi, T; Frahm, L; Parlatini, V; Aoki, YY; Castellanos, FX; Eickhoff, SB; Cortese, S	Shared and Specific Neural Correlates of Attention Deficit Hyperactivity Disorder and Autism Spectrum Disorder: A Meta-Analysis of 243 Task-Based Functional MRI Studies	AMERICAN JOURNAL OF PSYCHIATRY	181	6	541	552		10.1176/appi.ajp.20230270	2024	WOS:001242243500013
3	?	Wang, ZX; He, DM; Yang, L; Wang, PJ; Xiao, J; Zou, ZL; Min, WJ; He, Y; Yuan, C; Zhu, HR; Robinson, OJ	Similarities and differences between post-traumatic stress disorder and major depressive disorder: Evidence from task-evoked functional magnetic resonance imaging meta-analysis	JOURNAL OF AFFECTIVE DISORDERS	361		712	719		10.1016/j.jad.2024.06.095	2024	WOS:001262699800001
1	3.0.2	Sullivan, MA; Fritch, HA; Slotnick, SD	Spatial memory encoding is associated with the anterior and posterior hippocampus: An fMRI activation likelihood estimation meta-analysis	HIPPOCAMPUS	34	11	575	582		10.1002/hipo.23632	2024	WOS:001292393500001
1	3.0.2	Wan, L; Pei, PT; Zhang, QH; Gao, WX	Specificity in the commonalities of inhibition control: using meta-analysis and regression analysis to identify the key brain regions in psychiatric disorders	EUROPEAN PSYCHIATRY	67	1			e69	10.1192/j.eurpsy.2024.1785	2024	WOS:001330523800001
1	3.0.2	Kshatriya N.; Battistella G.; Simonyan K.	Structural and functional brain alterations in laryngeal dystonia: A coordinate-based activation likelihood estimation meta-analysis	Human Brain Mapping	45	14			e70000	10.1002/hbm.70000	2024	2-s2.0-85204661474
1	3.0.2	Li, JY; Kuang, SR; Liu, Y; Wu, YD; Li, HJ	Structural and functional brain alterations in subthreshold depression: A multimodal coordinate-based meta-analysis	HUMAN BRAIN MAPPING	45	7			e26702	10.1002/hbm.26702	2024	WOS:001217312500001
14	20	Tian, L; Zheng, HL; Zhang, K; Qiu, JW; Song, XJ; Li, SW; Zeng, Z; Ran, BS; Deng, X; Cai, JH	Structural or/and functional MRI-based machine learning techniques for attention-deficit/hyperactivity disorder diagnosis: A systematic review and meta-analysis	JOURNAL OF AFFECTIVE DISORDERS	355		459	469		10.1016/j.jad.2024.03.111	2024	WOS:001224789500001
2	?	Yao G.; Pan J.; Zou T.; Li J.; Li J.; He X.; Zhang F.; Xu Y.	Structure–function coupling changes in first-episode, treatment-naïve schizophrenia correlate with cell type-specific transcriptional signature	BMC Medicine	22	1			491	10.1186/s12916-024-03714-3	2024	2-s2.0-85207394227
1	?	Zhou, JH; Huang, BK; Wang, D; Ning, BL; Liang, XS; Li, CH; Wang, ZJ; Deng, Y; Huang, XC; Zhang, DL; Fu, WB	Subregions of the fusiform gyrus are differentially involved in the attentional mechanism supporting visual mental imagery in depression	BRAIN IMAGING AND BEHAVIOR	18	5	961	978		10.1007/s11682-024-00885-8	2024	WOS:001216055600002
1	3.0.2	Fascher, M; Nowaczynski, S; Muehlhan, M	Substance use disorders are characterised by increased voxel-wise intrinsic measures in sensorimotor cortices: An ALE meta-analysis	NEUROSCIENCE AND BIOBEHAVIORAL REVIEWS	162				105712	10.1016/j.neubiorev.2024.105712	2024	WOS:001241527200001
99		Cieslik E.C.; Ullsperger M.; Gell M.; Eickhoff S.B.; Langner R.	Success versus failure in cognitive control: Meta-analytic evidence from neuroimaging studies on error processing	Neuroscience and Biobehavioral Reviews	156				105468	10.1016/j.neubiorev.2023.105468	2024	2-s2.0-85178332709
1	3.0.2	Clarke S.; Rogers R.; Wanigasekera V.; Fardo F.; Pia H.; Nochi Z.; Macian N.; Leray V.; Finnerup N.B.; Pickering G.; Mouraux A.; Truini A.; Treede R.-D.; Garcia-Larrea L.; Tracey I.	Systematic review and co-ordinate based meta-analysis to summarize the utilization of functional brain imaging in conjunction with human models of peripheral and central sensitization	European Journal of Pain	28	7	1069	1094		10.1002/ejp.2251	2024	2-s2.0-85186464806
3	?	Guo Z.; Tang X.; Xiao S.; Yan H.; Sun S.; Yang Z.; Huang L.; Chen Z.; Wang Y.	Systematic review and meta-analysis: multimodal functional and anatomical neural alterations in autism spectrum disorder	Molecular Autism	15	1			16	10.1186/s13229-024-00593-6	2024	2-s2.0-85189644642
3	5.15	Wang, LH; Han, K; Huang, Q; Hu, WJ; Mo, JY; Wang, JY; Deng, K; Zhang, RB; Tan, XL	Systemic lupus erythematosus-related brain abnormalities in the default mode network and the limbic system: A resting-state fMRI meta-analysis	JOURNAL OF AFFECTIVE DISORDERS	355		190	199		10.1016/j.jad.2024.03.121	2024	WOS:001220507700001
1	3.0.2	Wang S.; Liu T.; Du J.; Chen J.; Luo X.; Meng Y.; Zeng C.; Zhang X.; Shao B.	Taichi on the brain: an activation likelihood estimated meta-analysis of functional neuroimaging data	Frontiers in Human Neuroscience	18				1493677	10.3389/fnhum.2024.1493677	2024	2-s2.0-85216804201
3	6.22	Li Z.; Tong G.; Wang Y.; Ruan H.; Zheng Z.; Cheng J.; Wang Z.	Task fMRI studies investigating inhibitory control in patients with obsessive-compulsive disorder and eating disorders: A comparative meta-analysis	World Journal of Biological Psychiatry	25	1	26	42		10.1080/15622975.2023.2251057	2024	2-s2.0-85173979694
2	?	Amos T.J.; Guragai B.; Rao Q.; Li W.; Jin Z.; Zhang J.; Li L.	Task functional networks predict individual differences in the speed of emotional facial discrimination	NeuroImage	297				120715	10.1016/j.neuroimage.2024.120715	2024	2-s2.0-85197528941
3	6.21	Wang Y.-M.; Zhang Y.-Y.; Wang Y.; Cao Q.; Zhang M.	Task-related brain activation associated with violence in patients with schizophrenia: A meta-analysis	Asian Journal of Psychiatry	97				104080	10.1016/j.ajp.2024.104080	2024	2-s2.0-85193780813
3	5.15	Du, JY; Liu, Y; Zhu, WH	The altered functional status in vestibular migraine: A meta-analysis	BRAIN AND BEHAVIOR	14	6			e3591	10.1002/brb3.3591	2024	WOS:001242298500001
1	3.0.2	Ma, RA; Si, XY; Ma, HK; Zou, F; Wang, YF; Zhang, M; Wu, X	The brain networks of alternative use task: a meta-analytic connectivity modeling analysis	CURRENT PSYCHOLOGY	43	33	26954	26966		10.1007/s12144-024-06295-9	2024	WOS:001275430700003
18	?	Wang, MM; Deng, Y; Liu, YY; Suo, T; Guo, BW; Eickhoff, SB; Xu, J; Rao, HY	The common and distinct brain basis associated with adult and adolescent risk-taking behavior: Evidence from the neuroimaging meta-analysis	NEUROSCIENCE AND BIOBEHAVIORAL REVIEWS	160				105607	10.1016/j.neubiorev.2024.105607	2024	WOS:001218412000001
1	3.0.2	Pinto, J; Comprido, C; Moreira, V; Maccarone, MT; Cogoni, C; Faustino, R; Pignatelli, D; Cera, N	The Complex Role Played by the Default Mode Network during Sexual Stimulation: A Cluster-Based fMRI Meta-Analysis	BEHAVIORAL SCIENCES	14	7			570	10.3390/bs14070570	2024	WOS:001276741400001
3	6.23	Cui X.; Ding Q.; Yu S.; Zhang S.; Li X.	The deficit in cognitive reappraisal capacity in individuals with anxiety or depressive disorders: meta-analyses of behavioral and neuroimaging studies	Clinical Psychology Review	114				102480	10.1016/j.cpr.2024.102480	2024	2-s2.0-85203148904
3,5	SDM-PSI: 6.22; NiMARE: 0.0.11	Bortolini, T; Laport, MC; Latgé-Tovar, S; Fischer, R; Zahn, R; de Oliveira-Souza, R; Moll, J	The extended neural architecture of human attachment: An fMRI coordinate-based meta-analysis of affiliative studies	NEUROSCIENCE AND BIOBEHAVIORAL REVIEWS	159				105584	10.1016/j.neubiorev.2024.105584	2024	WOS:001203994500001
1	2.3	Zhang, ZY; Shi, P; Zhang, K; Li, CY; Feng, XS	The frontal association area: exercise-induced brain plasticity in children and adolescents and implications for cognitive intervention practice	FRONTIERS IN HUMAN NEUROSCIENCE	18				1418803	10.3389/fnhum.2024.1418803	2024	WOS:001325255600001
1	3.0.2	Testa, G; Sotgiu, I; Rusconi, ML; Cauda, F; Costa, T	The Functional Neuroimaging of Autobiographical Memory for Happy Events: A Coordinate-Based Meta-Analysis	HEALTHCARE	12	7			711	10.3390/healthcare12070711	2024	WOS:001200877100001
3	?	Yang, B; Miao, RQ; Tian, ZL; Wang, TY; Zhu, FY; Li, T; Li, WY; Wu, J	The influence of traditional Chinese exercise on brain function compared with other sports: A meta-analysis on functional neuroimaging studies	HELIYON	10	17			e36736	10.1016/j.heliyon.2024.e36736	2024	WOS:001302026800001
2,10	?	Pacella, V; Nozais, V; Talozzi, L; Abdallah, M; Wassermann, D; Forkel, SJ; de Schotten, MT	The morphospace of the brain-cognition organisation	NATURE COMMUNICATIONS	15	1			8452	10.1038/s41467-024-52186-9	2024	WOS:001325893100013
1,7	GingeraLE: 3.0.2; R: ?	Scalabrini, A; Cavicchioli, M; Benedetti, F; Mucci, C; Northoff, G	The nested hierarchical model of self and its non-relational vs relational posttraumatic manifestation: an fMRI meta-analysis of emotional processing	MOLECULAR PSYCHIATRY	29	9	2859	2872		10.1038/s41380-024-02520-w	2024	WOS:001188809900001
1	3.0.2	Metaireau M.; Osiurak F.; Seye A.; Lesourd M.	The neural correlates of limb apraxia: An anatomical likelihood estimation meta-analysis of lesion-symptom mapping studies in brain-damaged patients	Neuroscience and Biobehavioral Reviews	162				105720	10.1016/j.neubiorev.2024.105720	2024	2-s2.0-85194314419
7	?	Damiani S.; Cavicchioli M.; Guiot C.; Donadeo A.; Scalabrini A.; Grecuzzo V.; Bergamaschini I.; Provenzani U.; Politi P.; Fusar-Poli P.	The noise in our brain: A systematic review and meta-analysis of neuroimaging and signal-detection studies on source monitoring in psychosis	Journal of Psychiatric Research	169		142	151		10.1016/j.jpsychires.2023.11.036	2024	2-s2.0-85178138185
3	5.15	Zheng H.; Zhai T.; Lin X.; Dong G.; Yang Y.; Yuan T.-F.	The resting-state brain activity signatures for addictive disorders	Med	5	3	201	223.e6		10.1016/j.medj.2024.01.008	2024	2-s2.0-85186689903
1,3	GingerALE: 3.0.2; SDM-PSI: 6.21	Ren, H; Li, YZ; Bi, HY; Yang, Y	The shared neurobiological basis of developmental dyslexia and developmental stuttering: A meta-analysis of functional and structural MRI studies	INTERNATIONAL JOURNAL OF CLINICAL AND HEALTH PSYCHOLOGY	24	4			100519	10.1016/j.ijchp.2024.100519	2024	WOS:001356064300001
3	6.22	Merola, GP; Tarchi, L; Saccaro, LF; Delavari, F; Piguet, C; van de Ville, D; Castellini, G; Ricca, V	Transdiagnostic markers across the psychosis continuum: a systematic review and meta-analysis of resting state fMRI studies	FRONTIERS IN PSYCHIATRY	15				1378439	10.3389/fpsyt.2024.1378439	2024	WOS:001249585400001
24	?	Mesmoudi, S; Dégeilh, F; Cancino, W; Rodic, M; Peschanski, D; Eustache, F	Transdisciplinary method for exploration and visualization of neuroimaging papers and databases: Application to PTSD	ANNALES MEDICO-PSYCHOLOGIQUES	182	10	908	917		10.1016/j.amp.2024.06.003	2024	WOS:001386323200001
1	3.0.2	Zhao, MH; Li, R; Xiang, SJ; Liu, N	Two different mirror neuron pathways for social and non-social actions? A meta-analysis of fMRI studies	SOCIAL COGNITIVE AND AFFECTIVE NEUROSCIENCE	19	1			nsae068	10.1093/scan/nsae068	2024	WOS:001332348500001
7	?	Wang X.; Yan C.; Yang P.-Y.; Xia Z.; Cai X.-L.; Wang Y.; Kwok S.C.; Chan R.C.K.	Unveiling the potential of machine learning in schizophrenia diagnosis: A meta-analytic study of task-based neuroimaging data	Psychiatry and Clinical Neurosciences	78	3	157	168		10.1111/pcn.13625	2024	2-s2.0-85181221965
1	2.3.6	Pandey, HR; Keshri, A; Singh, A; Sinha, N; Kumar, U	Using ALE coordinate-based meta-analysis to observe resting-state brain abnormalities in subjective tinnitus	BRAIN IMAGING AND BEHAVIOR	18	3	496	509		10.1007/s11682-023-00846-7	2024	WOS:001134147800002
1	3.0.2	Ding, H; Zhang, Q; Shu, YP; Tian, B; Peng, J; Hou, YZ; Wu, G; Lin, LY; Li, JL	Vulnerable brain regions in adolescent major depressive disorder: A resting-state functional magnetic resonance imaging activation likelihood estimation meta-analysis	WORLD JOURNAL OF PSYCHIATRY	14	3				10.5498/wjp.v14.i3.456	2024	WOS:001203197100007
1	3.0.2	Muehlhan M.; Spindler C.; Nowaczynski S.; Buchner C.; Fascher M.; Trautmann S.	Where alcohol use disorder meets interoception: A meta-analytic view on structural and functional neuroimaging data	Journal of Neurochemistry	168	9	2515	2531		10.1111/jnc.16104	2024	2-s2.0-85189523860
1	3.0.2	Meda, N; Miola, A; Cattarinussi, G; Sambataro, F	Whole-brain structural and functional neuroimaging of individuals who attempted suicide and people who did not: A systematic review and exploratory coordinate-based meta-analysis	EUROPEAN NEUROPSYCHOPHARMACOLOGY	79		66	77		10.1016/j.euroneuro.2023.10.003	2024	WOS:001166295900001
8	5.3	Ding, XY; Fu, HY; Luo, LY; Wu, J	Working memory deficit in schizophrenia: a systematic review and meta-analysis of fMRI studies examining frontal and parietal brain activity	FOLIA NEUROPATHOLOGICA	62	2	136	146		10.5114/fn.2023.132329	2024	WOS:001274983200004
1	3.0.1	Kim, Sihyong J.; Tanglay, Onur; Chong, Elizabeth H. N.; Young, Isabella M.; Fonseka, Rannulu D.; Taylor, Hugh; Nicholas, Peter; Doyen, Stephane; Sughrue, Michael E.	Functional connectivity in ADHD children doing Go/No-Go tasks: An fMRI systematic review and meta-analysis	TRANSLATIONAL NEUROSCIENCE	14	1			20220299	10.1515/tnsci-2022-0299	2023	WOS:001171617900001
2	?	Antons, Stephanie; Yip, Sarah W.; Lacadie, Cheryl M.; Dadashkarimi, Javid; Scheinost, Dustin; Brand, Matthias; Potenza, Marc N.	Connectome-based prediction of craving in gambling disorder and cocaine use disorder	DIALOGUES IN CLINICAL NEUROSCIENCE	25	1	33	42		10.1080/19585969.2023.2208586	2023	WOS:000990187800001
3	6.21	Xie, Hao; Yang, Yang; Sun, Qian; Li, Ze-Yang; Ni, Min-Hua; Chen, Zhu-Hong; Li, Si-Ning; Dai, Pan; Cui, Yan-Yan; Cao, Xin-Yu; Jiang, Nan; Du, Li-Juan; Yu, Ying; Yan, Lin-Feng; Cui, Guang-Bin	Abnormalities of cerebral blood flow and the regional brain function in Parkinson's disease: a systematic review and multimodal neuroimaging meta-analysis	FRONTIERS IN NEUROLOGY	14				1289934	10.3389/fneur.2023.1289934	2023	WOS:001127829500001
3	?	Xie, Hao; Yu, Ying; Yang, Yang; Sun, Qian; Li, Ze-Yang; Ni, Min-Hua; Li, Si-Ning; Dai, Pan; Cui, Yan-Yan; Cao, Xin-Yu; Jiang, Nan; Du, Li-Juan; Gao, Wen; Bi, Jia-Jun; Yan, Lin-Feng; Cui, Guang-Bin	Commonalities and distinctions between the type 2 diabetes mellitus and Alzheimer's disease: a systematic review and multimodal neuroimaging meta-analysis	FRONTIERS IN NEUROSCIENCE	17				1301778	10.3389/fnins.2023.1301778	2023	WOS:001127332300001
1	3.0.2	Cattarinussi, Giulia; Grimaldi, David Antonio; Sambataro, Fabio	Spontaneous Brain Activity Alterations in First-Episode Psychosis: A Meta-analysis of Functional Magnetic Resonance Imaging Studies	SCHIZOPHRENIA BULLETIN	49	6	1494	1507		10.1093/schbul/sbad044	2023	WOS:001160155200002
5	?	Diveica, Veronica; Riedel, Michael C.; Salo, Taylor; Laird, Angela R.; Jackson, Rebecca L.; Binney, Richard J.	Graded functional organization in the left inferior frontal gyrus: evidence from task-free and task-based functional connectivity	CEREBRAL CORTEX	33	23	11384	11399		10.1093/cercor/bhad373	2023	WOS:001155587700007
1	3.0.2	Tang, Chan; Huang, Ting; Huang, Jipeng; Xu, Nuo; Lyu, Hui; Wang, Yuan; Cao, Yifei	Effortful and effortless training of executive functions improve brain multiple demand system activities differently: an activation likelihood estimation meta-analysis of functional neuroimaging studies	FRONTIERS IN NEUROSCIENCE	17				1243409	10.3389/fnins.2023.1243409	2023	WOS:001114895000001
1	3.0.2	Feng, Sitong; Yao, Hao; Zheng, Sisi; Feng, Zhengtian; Liu, Xinzi; Liu, Rui; Dong, Linrui; Cai, Yongli; Jia, Hongxiao; Ning, Yanzhe	Altered Functional Connectivity in Working Memory Network After Acute Sleep Deprivation	NEUROSCIENCE	535		158	167		10.1016/j.neuroscience.2023.11.003	2023	WOS:001113118100001
4	?	Hosseini-Kamkar, Niki; Farahani, Mahdieh Varvani; Nikolic, Maja; Stewart, Kaycee; Goldsmith, Samantha; Soltaninejad, Mahdie; Rajabli, Reza; Lowe, Cassandra; Nicholson, Andrew A.; Morton, J. Bruce; Leyton, Marco	Adverse Life Experiences and Brain Function: A Meta-Analysis of Functional Magnetic Resonance Imaging Findings	JAMA NETWORK OPEN	6	11			e2340018	10.1001/jamanetworkopen.2023.40018	2023	WOS:001099923100003
1	3.0.2	Chaudhary, Inder S.; Shyi, Gary Chon-Wen; Huang, Shih-Tseng Tina	A systematic review and activation likelihood estimation meta-analysis of fMRI studies on arousing or wake-promoting effects in Buddhist meditation	FRONTIERS IN PSYCHOLOGY	14				1136983	10.3389/fpsyg.2023.1136983	2023	WOS:001103633900001
1	3.0.2	Varma, Mohith M.; Chowdhury, Avijit; Yu, Rongjun	The road not taken: Common and distinct neural correlates of regret and relief	NEUROIMAGE	283				120413	10.1016/j.neuroimage.2023.120413	2023	WOS:001103607300001
1	3.0.2	El Ouardi, Loubna; Yeou, Mohamed; Faroqi-Shah, Yasmeen	Neural correlates of pronoun processing: An activation likelihood estimation meta-analysis	BRAIN AND LANGUAGE	246				105347	10.1016/j.bandl.2023.105347	2023	WOS:001149129600001
6	1.1	Denny, Bryan T.; Jungles, Mallory L.; Goodson, Pauline N.; Dicker, Eva E.; Chavez, Julia; Jones, Jenna S.; Lopez, Richard B.	Unpacking reappraisal: a systematic review of fMRI studies of distancing and reinterpretation	SOCIAL COGNITIVE AND AFFECTIVE NEUROSCIENCE	18	1			nsad050	10.1093/scan/nsad050	2023	WOS:001077577200001
1	3.0.2	Kraaijenvanger, Eline J.; Banaschewski, Tobias; Eickhoff, Simon B.; Holz, Nathalie E.	A coordinate-based meta-analysis of human amygdala connectivity alterations related to early life adversities	SCIENTIFIC REPORTS	13	1			16541	10.1038/s41598-023-43057-2	2023	WOS:001082130500057
1	3.0.2	Henderson, Jessica; Mari, Tyler; Hewitt, Danielle; Newton-Fenner, Alice; Giesbrecht, Timo; Marshall, Alan; Stancak, Andrej; Fallon, Nicholas	The neural correlates of texture perception: A systematic review and activation likelihood estimation meta-analysis of functional magnetic resonance imaging studies	BRAIN AND BEHAVIOR	13	11				10.1002/brb3.3264	2023	WOS:001071515500001
1	3.0.2	Zugman, Andre; Jett, Laura; Antonacci, Chase; Winkler, Anderson M.; Pine, Daniel S.	A systematic review and meta-analysis of resting-state fMRI in anxiety disorders: Need for data sharing to move the field forward	JOURNAL OF ANXIETY DISORDERS	99				102773	10.1016/j.janxdis.2023.102773	2023	WOS:001084676900001
1,3	GingerALE: 3.0.2; SDM-PSI: 6.21	Tse, Nga Yan; Ratheesh, Aswin; Ganesan, Saampras; Zalesky, Andrew; Cash, Robin F. H.	Functional dysconnectivity in youth depression: Systematic review, meta-analysis, and network-based integration	NEUROSCIENCE AND BIOBEHAVIORAL REVIEWS	153				105394	10.1016/j.neubiorev.2023.105394	2023	WOS:001083714300001
1	3.0.2	Duvall, Lauren; May, Kaitlyn E.; Waltz, Abby; Kana, Rajesh K.	The neurobiological map of theory of mind and pragmatic communication in autism	SOCIAL NEUROSCIENCE	18	4	191	204		10.1080/17470919.2023.2242095	2023	WOS:001068329000001
7	4.2.2	Yang, Sheng; Webb, Alastair John Stewart	Associations between neurovascular coupling and cerebral small vessel disease: A systematic review and meta-analysis	EUROPEAN STROKE JOURNAL	8	4	895	903		10.1177/23969873231196981	2023	WOS:001079168900001
2	?	Han, Ziteng; Liu, Tiantian; Shi, Zhongyan; Zhang, Jian; Suo, Dingjie; Wang, Li; Chen, Duanduan; Wu, Jinglong; Yan, Tianyi	Investigating the heterogeneity within the somatosensory-motor network and its relationship with the attention and default systems	PNAS NEXUS	2	9			pgad276	10.1093/pnasnexus/pgad276	2023	WOS:001061890400001
3	5.15	Zeng, Xinglin; Han, Xinyang; Gao, Fei; Sun, Yinghao; Yuan, Zhen	Abnormal structural alterations and disrupted functional connectivity in behavioral addiction: A meta-analysis of VBM and fMRI studies	JOURNAL OF BEHAVIORAL ADDICTIONS	12	3	599	612		10.1556/2006.2023.00025	2023	WOS:001097901000003
1	3.0.2	Hormovas, Jorge; Dadario, Nicholas B.; Tang, Si Jie; Nicholas, Peter; Dhanaraj, Vukshitha; Young, Isabella; Doyen, Stephane; Sughrue, Michael E.	Parcellation-Based Connectivity Model of the Judgement Core	JOURNAL OF PERSONALIZED MEDICINE	13	9			1384	10.3390/jpm13091384	2023	WOS:001078572800001
2	?	Zheng, Sisi; Feng, Sitong; Yao, Hao; Dong, Linrui; Feng, Zhengtian; Liu, Xinzi; Zhang, Binlong; Jia, Hongxiao; Ning, Yanzhe	Altered functional connectivity after acute sleep deprivation reveals potential locations for noninvasive brain stimulation techniques	SLEEP MEDICINE	110		212	219		10.1016/j.sleep.2023.08.019	2023	WOS:001067414700001
1	3.0.2	Solomonov, Nili; Victoria, Lindsay W.; Lyons, Krystalle; Phan, Dustin K.; Alexopoulos, George S.; Gunning, Faith M.; Flueckiger, Christoph	Social reward processing in depressed and healthy individuals across the lifespan: A systematic review and a preliminary coordinate-based meta-analysis of fMRI studies	BEHAVIOURAL BRAIN RESEARCH	454				114632	10.1016/j.bbr.2023.114632	2023	WOS:001066748000001
1	3.0.2	von Gal, Alessandro; Boccia, Maddalena; Nori, Raffaella; Verde, Paola; Giannini, Anna Maria; Piccardi, Laura	Neural networks underlying visual illusions: An activation likelihood estimation meta-analysis	NEUROIMAGE	279				120335	10.1016/j.neuroimage.2023.120335	2023	WOS:001067645000001
3	5.15	Li, Huayun; Wang, Yihe; Xi, Hongyu; Zhang, Jianxin; Zhao, Mengqi; Jia, Xize	Alterations of regional spontaneous brain activity in obsessive-compulsive disorders: A meta-analysis	JOURNAL OF PSYCHIATRIC RESEARCH	165		325	335		10.1016/j.jpsychires.2023.07.036	2023	WOS:001057916000001
3	?	Zhong, Shuming; Su, Ting; Gong, Jiaying; Huang, Li; Wang, Ying	Brain functional alterations in patients with anorexia nervosa: A meta-analysis of task-based functional MRI studies	PSYCHIATRY RESEARCH	327				115358	10.1016/j.psychres.2023.115358	2023	WOS:001052524400001
3	5.15	Huang, Xiang; Li, Boyi; Li, Yuming; Lin, Junyu; Shang, Huifang; Yang, Jing	A multimodal meta-analysis of gray matter alterations in trigeminal neuralgia	FRONTIERS IN NEUROLOGY	14				1179896	10.3389/fneur.2023.1179896	2023	WOS:001049463800001
18	R2018a	Reimann, Gerion M.; Kueppers, Vincent; Camilleri, Julia A.; Hoffstaedter, Felix; Langner, Robert; Laird, Angela R.; Fox, Peter T.; Spiegelhalder, Kai; Eickhoff, Simon B.; Tahmasian, Masoud	Convergent abnormality in the subgenual anterior cingulate cortex in insomnia disorder: A revisited neuroimaging meta-analysis of 39 studies	SLEEP MEDICINE REVIEWS	71				101821	10.1016/j.smrv.2023.101821	2023	WOS:001049533700001
1	3.0.2	Monachesi, Bianca; Grecucci, Alessandro; Ghomroudi, Parisa Ahmadi; Messina, Irene	Comparing reappraisal and acceptance strategies to understand the neural architecture of emotion regulation: a meta-analytic approach	FRONTIERS IN PSYCHOLOGY	14				1187092	10.3389/fpsyg.2023.1187092	2023	WOS:001042842900001
3	?	Ruiz-Torras, Silvia; Gudayol-Ferre, Esteve; Fernandez-Vazquez, Oscar; Canete-Masse, Cristina; Pero-Cebollero, Maribel; Guardia-Olmos, Joan	Hypoconnectivity networks in schizophrenia patients: A voxel-wise meta-analysis of Rs-fMRI	INTERNATIONAL JOURNAL OF CLINICAL AND HEALTH PSYCHOLOGY	23	4			100395	10.1016/j.ijchp.2023.100395	2023	WOS:001050445300001
1	3.0.2	Tai, Alan P. L.; Leung, Mei-Kei; Geng, Xiujuan; Lau, Way K. W.	Conceptualizing psychological resilience through resting-state functional MRI in a mentally healthy population: a systematic review	FRONTIERS IN BEHAVIORAL NEUROSCIENCE	17				1175064	10.3389/fnbeh.2023.1175064	2023	WOS:001039193000001
3	6.22	Zang, Shuhan; Chen, Ying; Chen, Haonan; Shi, Huawei; Zhou, Li	Effects of acupuncture on the brain in primary insomnia: a coordinate-based meta-analysis of fMRI studies	FRONTIERS IN NEUROLOGY	14				1180393	10.3389/fneur.2023.1180393	2023	WOS:001041156600001
1	3.0.2	Newton-Fenner, Alice; Hewitt, Danielle; Henderson, Jessica; Roberts, Hannah; Mari, Tyler; Gu, Yiquan; Gorelkina, Olga; Giesbrecht, Timo; Fallon, Nicolas; Roberts, Carl; Stancak, Andrej	Economic value in the Brain: A meta-analysis of willingness-to-pay using the Becker-DeGroot-Marschak auction	PLOS ONE	18	7			e0286969	10.1371/journal.pone.0286969	2023	WOS:001027854200040
8	5.4	Zhang, Ziqi; Chen, Yu; Zhou, Xiqiao; Liu, Su; Yu, Jiangyi	The value of functional magnetic resonance imaging in the evaluation of diabetic kidney disease: a systematic review and meta-analysis	FRONTIERS IN ENDOCRINOLOGY	14				1226830	10.3389/fendo.2023.1226830	2023	WOS:001031914300001
3	6.21	Han, Yvonne M. Y.; Chan, Melody M. Y.; Choi, Coco X. T.; Law, Maxwell C. H.; Ahorsu, Daniel Kwasi; Tsang, Hector W. H.	The neurobiological effects of mind-body exercise: a systematic review and meta-analysis of neuroimaging studies	SCIENTIFIC REPORTS	13	1			10948	10.1038/s41598-023-37309-4	2023	WOS:001026209100043
1	2.3.6	Gou, Xin-yun; Li, Yu-xi; Guo, Liu-xue; Zhao, Jing; Zhong, Dong-ling; Liu, Xiao-bo; Xia, Hai-sha; Fan, Jin; Zhang, Yue; Ai, Shuang-chun; Huang, Jia-xi; Li, Hong-ru; Li, Juan; Jin, Rong-jiang	The conscious processing of emotion in depression disorder: a meta-analysis of neuroimaging studies	FRONTIERS IN PSYCHIATRY	14				1099426	10.3389/fpsyt.2023.1099426	2023	WOS:001024990800001
1	2.3.6	Yang, Xinyi; Wu, Huimin; Song, Yu; Chen, Shanshan; Ge, Honglin; Yan, Zheng; Yuan, Qianqian; Liang, Xuhong; Lin, Xingjian; Chen, Jiu	Functional MRI-specific alterations in frontoparietal network in mild cognitive impairment: an ALE meta-analysis	FRONTIERS IN AGING NEUROSCIENCE	15				1165908	10.3389/fnagi.2023.1165908	2023	WOS:001027012400001
1	3.0.2	Oka, Nodoka; Iwai, Koichiro; Sakai, Hiroyuki	The neural substrates responsible for food odor processing: an activation likelihood estimation meta-analysis	FRONTIERS IN NEUROSCIENCE	17				1191617	10.3389/fnins.2023.1191617	2023	WOS:001020481800001
3	6.21	Wang, Tao; Yan, Shaozhen; Lu, Jie	The effects of noninvasive brain stimulation on cognitive function in patients with mild cognitive impairment and Alzheimer's disease using resting-state functional magnetic resonance imaging: A systematic review and meta-analysis	CNS NEUROSCIENCE & THERAPEUTICS	29	11	3160	3172		10.1111/cns.14314	2023	WOS:001011859900001
1	2.3.6	Gavazzi, Gioele; Giovannelli, Fabio; Noferini, Chiara; Cincotta, Massimo; Cavaliere, Carlo; Salvatore, Marco; Mascalchi, Mario; Viggiano, Maria Pia	Subregional prefrontal cortex recruitment as a function of inhibitory demand: an fMRI metanalysis	NEUROSCIENCE AND BIOBEHAVIORAL REVIEWS	152				105285	10.1016/j.neubiorev.2023.105285	2023	WOS:001029035500001
3	?	Wang, Zuxing; He, Danmei; Yang, Lin; Wang, Peijia; Zou, Zhili; Xiao, Jun; Min, Wenjiao; He, Ying; Zhu, Hongru	Common and distinct patterns of task-related neural activation abnormalities in patients with remitted and current major depressive disorder: A systematic review and coordinate-based meta-analysis	NEUROSCIENCE AND BIOBEHAVIORAL REVIEWS	152				105284	10.1016/j.neubiorev.2023.105284	2023	WOS:001024442200001
3	6.21	Shepardson, Susie; Dahlgren, Kristina; Hamann, Stephan	Neural correlates of autobiographical memory retrieval: An SDM neuroimaging meta-analysis	CORTEX	166		59	79		10.1016/j.cortex.2023.05.006	2023	WOS:001024721200001
3	6.21	Zhang, Jinhuan; Liu, Yongfeng; Li, Zihan; Hu, Qingmao; Huang, Xingxian; Lv, Hanqing; Xu, Jinping; Yu, Haibo	Functional magnetic resonance imaging studies of acupuncture at ST36: a coordinate-based meta-analysis	FRONTIERS IN NEUROSCIENCE	17				1180434	10.3389/fnins.2023.1180434	2023	WOS:001010434700001
9	?	Voon, Noor Shatirah; Manan, Hanani Abdul; Yahya, Noorazrul	Role of resting-state functional MRI in detecting brain functional changes following radiotherapy for head and neck cancer: a systematic review and meta-analysis	STRAHLENTHERAPIE UND ONKOLOGIE	199	8	706	717		10.1007/s00066-023-02089-3	2023	WOS:001005019000001
1	3.0.2	Cesari, Valentina; Frumento, Sergio; Leo, Andrea; Baroni, Marina; Rutigliano, Grazia; Gemignani, Angelo; Menicucci, Danilo	Functional correlates of subliminal stimulation in Posttraumatic Stress Disorder: Systematic review and meta-analysis	JOURNAL OF AFFECTIVE DISORDERS	337		175	185		10.1016/j.jad.2023.05.047	2023	WOS:001015334500001
1	3.0.2	Gavazzi, Gioele; Noferini, Chiara; Benedetti, Viola; Cotugno, Maria; Giovannelli, Fabio; Caldara, Roberto; Mascalchi, Mario; Viggiano, Maria Pia	Cultural Differences in Inhibitory Control: An ALE Meta-Analysis	BRAIN SCIENCES	13	6			907	10.3390/brainsci13060907	2023	WOS:001014155400001
3	5.15	Li, Meng-Ting; Sun, Jia-Wei; Zhan, Lin-Lin; Antwi, Collins Opoku; Lv, Ya-Ting; Jia, Xi-Ze; Ren, Jun	The effect of seed location on functional connectivity: evidence from an image-based meta-analysis	FRONTIERS IN NEUROSCIENCE	17				1120741	10.3389/fnins.2023.1120741	2023	WOS:001005638800001
1	3.0.2	Chaudhary, Shefali; Zhang, Sheng; Zhornitsky, Simon; Chen, Yu; Chao, Herta H.; Li, Chiang-Shan R.	Age-related reduction in trait anxiety: Behavioral and neural evidence of automaticity in negative facial emotion processing	NEUROIMAGE	276				120207	10.1016/j.neuroimage.2023.120207	2023	WOS:001014577000001
1	3.0.2	Zhang, Yueyang; Mirman, Daniel; Hoffman, Paul	Taxonomic and thematic relations rely on different types of semantic features: Evidence from an fMRI meta-analysis and a semantic priming study	BRAIN AND LANGUAGE	242				105287	10.1016/j.bandl.2023.105287	2023	WOS:001013051600001
3	5.15	Foerster, Katharina; Maliske, Lara. Z.; Schurz, Matthias; Henneberg, Paula. M.; Dannlowski, Udo; Kanske, Philipp	How do bipolar disease states affect positive and negative emotion processing? Insights from a meta-analysis on the neural fingerprints of emotional processing	BIPOLAR DISORDERS	25	7	540	553		10.1111/bdi.13341	2023	WOS:000997132700001
3	6.21	Lavalle, Layla; Brunelin, Jerome; Jardri, Renaud; Haesebaert, Frederic; Mondino, Marine	The neural signature of reality-monitoring: A meta-analysis of functional neuroimaging studies	HUMAN BRAIN MAPPING	44	11	4372	4389		10.1002/hbm.26387	2023	WOS:000996048800001
2	?	Yadav, Yasharth; Elumalai, Pavithra; Williams, Nitin; Jost, Juergen; Samal, Areejit	Discrete Ricci curvatures capture age-related changes in human brain functional connectivity networks	FRONTIERS IN AGING NEUROSCIENCE	15				1120846	10.3389/fnagi.2023.1120846	2023	WOS:001002109200001
2	0.3.7	Murray, Stuart B.; Rokicki, Jaroslav; Sartorius, Alina M.; Winterton, Adriano; Andreassen, Ole A.; Westlye, Lars T.; Nagata, Jason M.; Quintana, Daniel S.	Brain-based gene expression of putative risk genes for anorexia nervosa	MOLECULAR PSYCHIATRY	28	6	2612	2619		10.1038/s41380-023-02110-2	2023	WOS:000993342600001
1	3.0.2	Nichols, Emily S.; Blumenthal, Anna; Kuenzel, Elizabeth; Skinner, Jasmyn K.; Duerden, Emma G.	Hippocampus long-axis specialization throughout development: A meta-analysis	HUMAN BRAIN MAPPING	44	11	4211	4224		10.1002/hbm.26340	2023	WOS:000991439500001
10	?	Godefroy, Olivier; Aarabi, Ardalan; Dorchies, Flore; Barbay, Melanie; Andriuta, Daniela; Diouf, Momar; de Schotten, Michel Thiebaut; Kassir, Rania; Tasseel-Ponche, Sophie; Roussel, Martine; RECogVASC Study Grp	Functional architecture of executive processes: Evidence from verbal fluency and lesion mapping in stroke patients	CORTEX	164		129	143		10.1016/j.cortex.2023.03.013	2023	WOS:000998161400001
3	5.15	Yang, Chengmin; Gao, Xin; Liu, Naici; Sun, Hui; Gong, Qiyong; Yao, Li; Lui, Su	Convergent and distinct neural structural and functional patterns of mild cognitive impairment: a multimodal meta-analysis	CEREBRAL CORTEX	33	14	8876	8889		10.1093/cercor/bhad167	2023	WOS:000988915000001
11	3	Karamacoska, Diana; Butt, Ali; Leung, Isabella H. K.; Childs, Ryan L.; Metri, Najwa-Joelle; Uruthiran, Vithya; Tan, Tiffany; Sabag, Angelo; Steiner-Lim, Genevieve Z.	Brain function effects of exercise interventions for cognitive decline: a systematic review and meta-analysis	FRONTIERS IN NEUROSCIENCE	17				1127065	10.3389/fnins.2023.1127065	2023	WOS:001000310800001
3	6.21	Song, Wenjuan; Zhao, Liuyan; Li, Xuekun; Wu, Baolin	Altered brain activity in patients with end-stage renal disease: A meta-analysis of resting-state functional imaging	BRAIN AND BEHAVIOR	13	7				10.1002/brb3.3057	2023	WOS:000987110300001
1	3.0.2	Antoniou, Georgia; Lambourg, Emilie; Steele, J. Douglas; Colvin, Lesley A.	The effect of adverse childhood experiences on chronic pain and major depression in adulthood: a systematic review and meta-analysis	BRITISH JOURNAL OF ANAESTHESIA	130	6	729	746		10.1016/j.bja.2023.03.008	2023	WOS:001001518300001
3	5.15	Mao, Yangke; Zhang, Pan; Sun, Ruirui; Zhang, Xinyue; He, Yuqi; Li, Siyang; Yin, Tao; Zeng, Fang	Altered resting-state brain activity in functional dyspepsia patients: a coordinate-based meta-analysis	FRONTIERS IN NEUROSCIENCE	17				1174287	10.3389/fnins.2023.1174287	2023	WOS:000993942500001
3	5.15	Zeng, Jianguang; You, Lantao; Sheng, Haoxuan; Luo, Ya; Yang, Xun	The differential neural substrates for reward choice under gain-loss contexts and risk in alcohol use disorder: Evidence from a voxel-based meta-analysis	DRUG AND ALCOHOL DEPENDENCE	248				109912	10.1016/j.drugalcdep.2023.109912	2023	WOS:001002173300001
1	3.0.2	Seon, Changwoo; Lee, Dong Hyuk; Kwon, Bo-In; Yu, Jun-Sang; Park, Sang Kyun; Woo, Yeonju; Kim, Joo-Hee	Neural mechanisms of acupuncture for peripheral facial nerve palsy: A protocol for systematic review and meta analysis	MEDICINE	102	18				10.1097/MD.0000000000033642	2023	WOS:000984871600028
1	2.3	Aguiar, Rebecca J. Nelson; Vitacco, Michael J.; Staats, Megan L. Porter; Dzurny, Tess	Psychopathy and callous-unemotional traits in adolescence: A systematic review of cultural inclusion and meta-analysis of fMRI neural correlates	JOURNAL OF CRIMINAL JUSTICE	86				102067	10.1016/j.jcrimjus.2023.102067	2023	WOS:000990911400001
12	6	Hiew, Shawn; Roothans, Jonas; Eldebakey, Hazem; Volkmann, Jens; Zeller, Daniel; Reich, Martin M.	Imaging the spin: Disentangling the core processes underlying mental rotation by network mapping of data from meta-analysis	NEUROSCIENCE AND BIOBEHAVIORAL REVIEWS	150				105187	10.1016/j.neubiorev.2023.105187	2023	WOS:000989523100001
5	0.0.10	Kruithof, Eline S.; Klaus, Jana; Schutter, Dennis J. L. G.	The human cerebellum in reward anticipation and outcome processing: An activation likelihood estimation meta-analysis	NEUROSCIENCE AND BIOBEHAVIORAL REVIEWS	149				105171	10.1016/j.neubiorev.2023.105171	2023	WOS:000984454700001
1	3.0.2	Dang, Qinpu; Ma, Fengyang; Yuan, Qiming; Fu, Yongben; Chen, Keyue; Zhang, Zhaoqi; Lu, Chunming; Guo, Taomei	Processing negative emotion in two languages of bilinguals: Accommodation and assimilation of the neural pathways based on a meta-analysis	CEREBRAL CORTEX	33	13	8352	8367		10.1093/cercor/bhad121	2023	WOS:000971483600001
1	3.0.2	Lo Presti, Sara; Origlia, Sara; Gianelli, Claudia; Canessa, Nicola	Cognition, body, and mind: A three-in-one coordinate-based fMRI meta-analysis on cognitive, physical, and meditative trainings	HUMAN BRAIN MAPPING	44	9	3795	3814		10.1002/hbm.26312	2023	WOS:000973400600001
1,2	GingerALE: 3.0.2; Neurosynth: ?	MacLean, Michele W.; Hadid, Vanessa; Spreng, R. Nathan; Lepore, Franco	Revealing robust neural correlates of conscious and unconscious visual processing: Activation likelihood estimation meta-analyses	NEUROIMAGE	273				120088	10.1016/j.neuroimage.2023.120088	2023	WOS:000984571400001
3,7	?	Cavicchioli, Marco; Ogliari, Anna; Maffei, Cesare; Mucci, Clara; Northoff, Georg; Scalabrini, Andrea	Neural responses to emotional stimuli across the dissociative spectrum: Common and specific mechanisms	PSYCHIATRY AND CLINICAL NEUROSCIENCES	77	6	315	329		10.1111/pcn.13547	2023	WOS:000969566300001
1	?	Yu, Xin-ming; Lv, Wen-ming; Liu, Xiao-liang; Kang, Xi-zhi; Zhang, Liang-wen	Abnormal activation of brain regions in idiopathic trigeminal neuralgia patients by fMRI: An activation likelihood estimation meta-analysis	CLINICAL NEUROLOGY AND NEUROSURGERY	228				107710	10.1016/j.clineuro.2023.107710	2023	WOS:000981160100001
1	3.0.2	Hauptman, Miriam; Blank, Idan; Fedorenko, Evelina	Non-literal language processing is jointly supported by the language and theory of mind networks: Evidence from a novel meta-analytic fMRI approach	CORTEX	162		96	114		10.1016/j.cortex.2023.01.013	2023	WOS:000976386200001
1	3.0.2	Piretti, Luca; Pappaianni, Edoardo; Garbin, Claudia; Rumiati, Raffaella Ida; Job, Remo; Grecucci, Alessandro	The Neural Signatures of Shame, Embarrassment, and Guilt: A Voxel-Based Meta-Analysis on Functional Neuroimaging Studies	BRAIN SCIENCES	13	4			559	10.3390/brainsci13040559	2023	WOS:000977670400001
3	5.15	Wen, Jian-Jie; Gao, Yan-Yan; Li, Meng-Ting; Hu, Su; Zhao, Meng-Qi; Su, Chang; Wang, Qing; Xi, Hong-Yu; Zhan, Lin-Lin; Lv, Ya-Ting; Antwi, Collins Opoku; Ren, Jun; Jia, Xi-Ze	Regional abnormalities of spontaneous brain activity in migraine: A coordinate-based meta-analysis	JOURNAL OF NEUROSCIENCE RESEARCH	101	8	1205	1223		10.1002/jnr.25191	2023	WOS:000962255200001
3	?	Zhang, Sirui; Lin, Junyu; Cheng, Yangfan; Hou, Yanbin; Shang, Huifang	Aberrant resting-state brain activity in Huntington's disease: A voxel-based meta-analysis	FRONTIERS IN NEUROLOGY	14				1124158	10.3389/fneur.2023.1124158	2023	WOS:000969302700001
3	6.21	Berluti, Kathryn; Ploe, Montana L.; Marsh, Abigail A.	Emotion processing in youths with conduct problems: an fMRI meta-analysis	TRANSLATIONAL PSYCHIATRY	13	1			105	10.1038/s41398-023-02363-z	2023	WOS:000961046200002
7	4.1.2	Gao, Ziyang; Xiao, Yuan; Zhu, Fei; Tao, Bo; Yu, Wei; Lui, Su	The whole-brain connectome landscape in patients with schizophrenia: A systematic review and meta-analysis of graph theoretical characteristics	NEUROSCIENCE AND BIOBEHAVIORAL REVIEWS	148				105144	10.1016/j.neubiorev.2023.105144	2023	WOS:000972447000001
1	3.0.2	Mesbah, Rahele; Koenders, Manja A.; van der Wee, Nic J. A.; Giltay, Erik J.; van Hemert, Albert M.; de Leeuw, Max	Association Between the Fronto-Limbic Network and Cognitive and Emotional Functioning in Individuals With Bipolar Disorder A Systematic Review and Meta-analysis	JAMA PSYCHIATRY	80	5	432	440		10.1001/jamapsychiatry.2023.0131	2023	WOS:000961100500005
1	3.0.2	Costa, Tommaso; Liloia, Donato; Cauda, Franco; Fox, Peter T. T.; Mutta, Francesca Dalla; Duca, Sergio; Manuello, Jordi	A Minimum Bayes Factor Based Threshold for Activation Likelihood Estimation	NEUROINFORMATICS	21	2	365	374		10.1007/s12021-023-09626-6	2023	WOS:000959126800001
3	5.15	Cheng, Lulu; Xi, Hongyu; Gu, Haiyan; Gao, Yanyan; Hu, Su; Li, Mengting; Hao, Zeqi; Wen, Jianjie; Zhang, Jianxin; Lv, Yating; Zhan, Linlin; Jia, Xize	Abnormalities of regional spontaneous brain activity in poststroke aphasia: a meta-analysis	CEREBRAL CORTEX	33	12	7771	7782		10.1093/cercor/bhad078	2023	WOS:000950287200001
1	2.3.6	Dadario, Nicholas B.; Tanglay, Onur; Stafford, Jordan F.; Davis, Ethan J.; Young, Isabella M.; Fonseka, R. Dineth; Briggs, Robert G.; Yeung, Jacky T.; Teo, Charles; Sughrue, Michael E.	Topology of the lateral visual system: The fundus of the superior temporal sulcus and parietal area H connect nonvisual cerebrum to the lateral occipital lobe	BRAIN AND BEHAVIOR	13	4				10.1002/brb3.2945	2023	WOS:000948318400001
3	5.15	Zeng, Jianguang; Yan, Jiangnan; You, Lantao; Liao, Tingting; Luo, Ya; Cheng, Bochao; Yang, Xun	A Meta-Analysis of Neural Correlates of Reward Anticipation in Individuals at Clinical Risk for Schizophrenia	INTERNATIONAL JOURNAL OF NEUROPSYCHOPHARMACOLOGY	26	4	280	293		10.1093/ijnp/pyad009	2023	WOS:000966020800001
3	6.21	Li, Mengyuan; Huang, Haipeng; Yao, Lin; Yang, Hongmei; Ma, Shiqi; Zheng, Haizhu; Zhong, Zhen; Yu, Shuo; Yu, Bin; Wang, Hongfeng	Effect of acupuncture on the modulation of functional brain regions in migraine: A meta-analysis of fMRI studies	FRONTIERS IN NEUROLOGY	14				1036413	10.3389/fneur.2023.1036413	2023	WOS:000957163400001
1	3.0.2	Defendini, Ana; Jenkins, Adrianna C.	Dissociating neural sensitivity to target identity and mental state content type during inferences about other minds	SOCIAL NEUROSCIENCE	18	2	103	121		10.1080/17470919.2023.2208879	2023	WOS:001121237000001
3	6.21	Yan, Hong; Xiao, Shu; Fu, Siying; Gong, Jiaying; Qi, Zhangzhang; Chen, Guanmao; Chen, Pan; Tang, Guixian; Su, Ting; Yang, Zibin; Wang, Ying	Functional and structural brain abnormalities in substance use disorder: A multimodal meta-analysis of neuroimaging studies	ACTA PSYCHIATRICA SCANDINAVICA	147	4	345	359		10.1111/acps.13539	2023	WOS:000943282600001
13	?	Nawaz, Humma; Shah, Ismail; Ali, Sajid	The amygdala connectivity with depression and suicide ideation with suicide behavior: A meta-analysis of structural MRI, resting-state fMRI and task fMRI	PROGRESS IN NEURO-PSYCHOPHARMACOLOGY & BIOLOGICAL PSYCHIATRY	124				110736	10.1016/j.pnpbp.2023.110736	2023	WOS:001007009000001
3	5.15	Hu, Su; Hao, Zeqi; Li, Mengting; Zhao, Mengqi; Wen, Jianjie; Gao, Yanyan; Wang, Qing; Xi, Hongyu; Antwi, Collins Opoku; Jia, Xize; Ren, Jun	Resting-state abnormalities in functional connectivity of the default mode network in migraine: A meta-analysis	FRONTIERS IN NEUROSCIENCE	17				1136790	10.3389/fnins.2023.1136790	2023	WOS:000948869300001
3	5.15	Zeng, Jianguang; You, Lantao; Yang, Fan; Luo, Ya; Yu, Shuxian; Yan, Jiangnan; Liu, Mengqi; Yang, Xun	A meta-analysis of the neural substrates of monetary reward anticipation and outcome in alcohol use disorder	HUMAN BRAIN MAPPING	44	7	2841	2861		10.1002/hbm.26249	2023	WOS:000939822500001
1	3.0.2	Arioli, Maria; Cattaneo, Zaira; Parimbelli, Simone; Canessa, Nicola	Relational vs representational social cognitive processing: a coordinate-based meta-analysis of neuroimaging data	SOCIAL COGNITIVE AND AFFECTIVE NEUROSCIENCE	18	1			nsad003	10.1093/scan/nsad003	2023	WOS:000941602600003
3	6.21	Pollard, Anna A.; Hauson, Alexander O.; Lackey, Nicholas S.; Zhang, Emily; Khayat, Sarah; Carson, Bryce; Fortea, Lydia; Radua, Joaquim; Grant, Igor	Functional neuroanatomy of craving in heroin use disorder: voxel-based meta-analysis of functional magnetic resonance imaging (fMRI) drug cue reactivity studies	AMERICAN JOURNAL OF DRUG AND ALCOHOL ABUSE	49	4	418	430		10.1080/00952990.2023.2172423	2023	WOS:000945412000001
99		Maliske, Lara Z.; Schurz, Matthias; Kanske, Philipp	Interactions within the social brain: Co-activation and connectivity among networks enabling empathy and Theory of Mind	NEUROSCIENCE AND BIOBEHAVIORAL REVIEWS	147				105080	10.1016/j.neubiorev.2023.105080	2023	WOS:000965608100001
1	2.3.6	Xue, Chen; Zhang, Xulian; Cao, Ping; Yuan, Qianqian; Liang, Xuhong; Zhang, Da; Qi, Wenzhang; Hu, Jun; Xiao, Chaoyong	Evidence of functional abnormalities in the default mode network in bipolar depression: A coordinate-based activation likelihood estimation meta-analysis	JOURNAL OF AFFECTIVE DISORDERS	326		96	104		10.1016/j.jad.2023.01.088	2023	WOS:000964533500001
1	3.0.2	Musco, Margherita Adelaide; Zazzera, Elisa; Paulesu, Eraldo; Sacheli, Lucia Maria	Error observation as a window on performance monitoring in social contexts? A systematic review	NEUROSCIENCE AND BIOBEHAVIORAL REVIEWS	147				105077	10.1016/j.neubiorev.2023.105077	2023	WOS:000942345700001
18	?	Schumer, Maya C. C.; Chase, Henry W. W.; Rozovsky, Renata; Eickhoff, Simon B. B.; Phillips, Mary L. L.	Prefrontal, parietal, and limbic condition-dependent differences in bipolar disorder: a large-scale meta-analysis of functional neuroimaging studies	MOLECULAR PSYCHIATRY	28	7	2826	2838		10.1038/s41380-023-01974-8	2023	WOS:000930456900004
4	?	Schulz, Corinna; Vezzani, Cecilia; Kroemer, Nils B.	How gut hormones shape reward: A systematic review of the role of ghrelin and GLP-1 in human fMRI	PHYSIOLOGY & BEHAVIOR	263				114111	10.1016/j.physbeh.2023.114111	2023	WOS:000946697500001
1	3.0.2	Pierce, Zachary P.; Johnson, Emily R.; Kim, Isabelle A.; Lear, Brianna E.; Mast, A. Michaela; Black, Jessica M.	Therapeutic interventions impact brain function and promote post-traumatic growth in adults living with post-traumatic stress disorder: A systematic review and meta-analysis of functional magnetic resonance imaging studies	FRONTIERS IN PSYCHOLOGY	14				1074972	10.3389/fpsyg.2023.1074972	2023	WOS:001068301900001
1	3.0.2	Martinez-Lincoln, Amanda; Fotidzis, Tess S.; Cutting, Laurie E.; Price, Gavin R.; Barquero, Laura A.	Examination of common and unique brain regions for atypical reading and math: a meta-analysis	CEREBRAL CORTEX	33	11	6959	6989		10.1093/cercor/bhad013	2023	WOS:000935072400001
3	?	Morys, Filip; Garcia-Garcia, Isabel; Dagher, Alain	Is obesity related to enhanced neural reactivity to visual food cues? A review and meta-analysis	SOCIAL COGNITIVE AND AFFECTIVE NEUROSCIENCE	18	1			nsaa113	10.1093/scan/nsaa113	2023	WOS:000929583400010
1	3.0.2	Miola, Alessandro; Meda, Nicola; Perini, Giulia; Sambataro, Fabio	Structural and functional features of treatment-resistant depression: A systematic review and exploratory coordinate-based meta-analysis of neuroimaging studies	PSYCHIATRY AND CLINICAL NEUROSCIENCES	77	5				10.1111/pcn.13530	2023	WOS:000928773100001
2	?	Ge, Sheng; He, Jing; Lin, Pan; Wang, Ruimin; Iramina, Keiji; Leng, Yue; Wang, Haixian; Zheng, Wenming; Xiao, Chaoyong; Li, Zonghong	Effective Connectivity Analysis and Classification of Action Observation From Different Perspectives: An fMRI Study	IEEE TRANSACTIONS ON BIOMEDICAL ENGINEERING	70	2	723	734		10.1109/TBME.2022.3201547	2023	WOS:000967240800001
3	6.21	Neumann, Nicola; Fullana, Miquel A.; Radua, Joaquim; Brandt, Thomas; Dieterich, Marianne; Lotze, Martin	Common neural correlates of vestibular stimulation and fear learning: an fMRI meta-analysis	JOURNAL OF NEUROLOGY	270	4	1843	1856		10.1007/s00415-023-11568-7	2023	WOS:000926058700002
1	3.0.2	Luo, Jingyi; Yi, Pengcheng; Liang, Meng; Zhang, Shuyu; Tao, Qin; Li, Ni; Zhang, Han; Wen, Jialin; Xue, Xinrong; Fan, Chuan; Li, Xiaoming	Distinct brain activity alterations of treatment for bipolar disorders with psychotherapy and drug therapy: activation likelihood estimation meta-analysis	PSYCHOLOGICAL MEDICINE	53	3	625	637	PII S0033291722003889	10.1017/S0033291722003889	2023	WOS:000923964300001
1	2.3.6	Zhao, Jing; Guo, Liu-xue; Li, Hong-ru; Gou, Xin-yun; Liu, Xiao-bo; Zhang, Yue; Zhong, Dong-ling; Li, Yu-xi; Zheng, Zhong; Li, Juan; Feng, Yue; Jin, Rong-jiang	The effects of acupuncture therapy in migraine: An activation likelihood estimation meta-analysis	FRONTIERS IN NEUROSCIENCE	16				1097450	10.3389/fnins.2022.1097450	2023	WOS:000929035400001
1	3.0.2	Lee, Ka Shu; Hagan, Cheyanne N.; Hughes, Mina; Cotter, Grace; Freud, Eva McAdam; Kircanski, Katharina; Leibenluft, Ellen; Brotman, Melissa A.; Tseng, Wan-Ling	Systematic Review and Meta-analysis: Task-based fMRI Studies in Youths With Irritability	JOURNAL OF THE AMERICAN ACADEMY OF CHILD AND ADOLESCENT PSYCHIATRY	62	2	208	229		10.1016/j.jaac.2022.05.014	2023	WOS:000926334600001
2	?	Schroeter, Matthias L.; Godulla, Jannis; Thiel, Friederike; Taskin, Birol; Beutner, Frank; Dubovoy, Vladimir K.; Teren, Andrej; Camilleri, Julia; Eickhoff, Simon; Villringer, Arno; Mueller, Karsten	Heart failure decouples the precuneus in interaction with social cognition and executive functions	SCIENTIFIC REPORTS	13	1				10.1038/s41598-023-28338-0	2023	WOS:000954571900022
5	?	Lotter, Leon D.; Kohl, Simon H.; Gerloff, Christian; Bell, Laura; Niephaus, Alexandra; Kruppa, Jana A.; Dukart, Juergen; Schulte-Ruether, Martin; Reindl, Vanessa; Konrad, Kerstin	Revealing the neurobiology underlying interpersonal neural synchronization with multimodal data fusion	NEUROSCIENCE AND BIOBEHAVIORAL REVIEWS	146				105042	10.1016/j.neubiorev.2023.105042	2023	WOS:000923809300001
1	3.0.2	Qin, Yin; Tang, Yuting; Liu, Xiaoying; Qiu, Shuting	Neural basis of dysphagia in stroke: A systematic review and meta-analysis	FRONTIERS IN HUMAN NEUROSCIENCE	17				1077234	10.3389/fnhum.2023.1077234	2023	WOS:000922558600001
3	6.21	Fang, Qian; Cai, Huanhuan; Jiang, Ping; Zhao, Han; Song, Yu; Zhao, Wenming; Yu, Yongqiang; Zhu, Jiajia	Transcriptional substrates of brain structural and functional impairments in drug-naive first-episode patients with major depressive disorder	JOURNAL OF AFFECTIVE DISORDERS	325		522	533		10.1016/j.jad.2023.01.051	2023	WOS:000923562300001
1	3.0.2	Marapin, Ramesh S.; van der Horn, Harm J.; van der Stouwe, A. M. Madelein; Dalenberg, Jelle R.; de Jong, Bauke M.; Tijssen, Marina A. J.	Altered brain connectivity in hyperkinetic movement disorders: A review of resting-state fMRI	NEUROIMAGE-CLINICAL	37				103302	10.1016/j.nicl.2022.103302	2023	WOS:000975420800001
14	13.1	Zhou, Huan; Si, Yi; Sun, Jiantong; Deng, Jiaxin; Yang, Ling; Tang, Yi; Qin, Wei	Effectiveness of functional magnetic resonance imaging for early identification of chronic kidney disease: A systematic review and network meta-analysis	EUROPEAN JOURNAL OF RADIOLOGY	160				110694	10.1016/j.ejrad.2023.110694	2023	WOS:000919851500001
2	?	Noro, Yusuke; Li, Ruixiang; Matsui, Teppei; Jimura, Koji	A method for reconstruction of interpretable brain networks from transient synchronization in resting-state BOLD fluctuations	FRONTIERS IN NEUROINFORMATICS	16				960607	10.3389/fninf.2022.960607	2023	WOS:000918473200001
1	3.0.2	Goodwill, Alicia M.; Low, Li Tong; Fox, Peter T.; Fox, P. Mickle; Poon, Kenneth K.; Bhowmick, Sourav S.; Chen, S. H. Annabel	Meta-analytic connectivity modelling of functional magnetic resonance imaging studies in autism spectrum disorders	BRAIN IMAGING AND BEHAVIOR	17	2	257	269		10.1007/s11682-022-00754-2	2023	WOS:000913424400001
1	3.0.2	Strege, Marlene V. V.; Siegle, Greg J. J.; Richey, John A. A.; Krawczak, Rebecca A. A.; Young, Kymberly	Cingulate prediction of response to antidepressant and cognitive behavioral therapies for depression: Meta-analysis and empirical application	BRAIN IMAGING AND BEHAVIOR	17	4	450	460		10.1007/s11682-022-00756-0	2023	WOS:000911745800001
3	5.15	Yu, Miaomiao; Gao, Xinyu; Niu, Xiaoyu; Zhang, Mengzhe; Yang, Zhengui; Han, Shaoqiang; Cheng, Jingliang; Zhang, Yong	Meta-analysis of structural and functional alterations of brain in patients with attention-deficit/hyperactivity disorder	FRONTIERS IN PSYCHIATRY	13				1070142	10.3389/fpsyt.2022.1070142	2023	WOS:000918335700001
3	6.21	Saarinen, Aino; Keltikangas-Jarvinen, Liisa; Ravaja, Niklas	Ethnicity, minority status, and inter-group bias: A systematic meta-analysis on fMRI studies	FRONTIERS IN HUMAN NEUROSCIENCE	16				1072345	10.3389/fnhum.2022.1072345	2023	WOS:000918802500001
1	3.0.2	Zheng, Qian; Ba, Xiaojuan; Wang, Qiang; Cheng, Junying; Nan, Jiaofen; He, Taigang	Functional differentiation of the dorsal striatum: a coordinate-based neuroimaging meta-analysis	QUANTITATIVE IMAGING IN MEDICINE AND SURGERY	13	1	471	+		10.21037/qims-22-133	2023	WOS:000898516600013
7	4.2.0	Crow, Andrew J. D.; Thomas, Alisha; Rao, Yash; Beloor-Suresh, Ashithkumar; Weinstein, David; Hinds, Walter A.; Tracy, Joseph I.	Task-based functional magnetic resonance imaging prediction of postsurgical cognitive outcomes in temporal lobe epilepsy: A systematic review, meta-analysis, and new data	EPILEPSIA	64	2	266	283		10.1111/epi.17475	2023	WOS:000904956000001
1	3.0.2	Kim, Hongkeun	Neural correlates of paired associate recollection: A neuroimaging meta-analysis	BRAIN RESEARCH	1801				148200	10.1016/j.brainres.2022.148200	2023	WOS:000909018200001
1	3	Kuhnke, Philipp; Beaupain, Marie C.; Arola, Johannes; Kiefer, Markus; Hartwigsen, Gesa	Meta-analytic evidence for a novel hierarchical model of conceptual processing	NEUROSCIENCE AND BIOBEHAVIORAL REVIEWS	144				104994	10.1016/j.neubiorev.2022.104994	2023	WOS:000900837400003
3,15	SDM-PSI: 6.21; BayesFactorFMRI: ?	Fiorito, Anna M.; Aleman, Andre; Blasi, Giuseppe; Bourque, Josiane; Cao, Hengyi; Chan, Raymond C. K.; Chowdury, Asadur; Conrod, Patricia; Diwadkar, Vaibhav A.; Goghari, Vina M.; Guinjoan, Salvador; Gur, Raquel E.; Gur, Ruben C.; Kwon, Jun Soo; Lieslehto, Johannes; Lukow, Paulina B.; Meyer-Lindenberg, Andreas; Modinos, Gemma; Quarto, Tiziana; Spilka, Michael J.; Shivakumar, Venkataram; Venkatasubr…	Are Brain Responses to Emotion a Reliable Endophenotype of Schizophrenia? An Image Based Functional Magnetic Resonance Imaging Meta-analysis	BIOLOGICAL PSYCHIATRY	93	2	167	177		10.1016/j.biopsych.2022.06.013	2023	WOS:000934046300001
1	?	Ahmed, Yaman B.; Al-Bzour, Ayah N.; Alzghoul, Saja M.; Ibrahim, Ruaa B.; Al-Khalili, Anas A.; Al-Majali, Ghayda'a N.; Hamza, Ammar I.; Al-Zamer, Yazan S.; Alhayek, Kefah; Kofahi, Raed; Leffler, Alexandra; El Salem, Khalid; Al Qawasmeh, Majdi	Limbic and cortical regions as functional biomarkers associated with emotion regulation in bipolar disorder: A meta-analysis of neuroimaging studies	JOURNAL OF AFFECTIVE DISORDERS	323		506	513		10.1016/j.jad.2022.11.071	2023	WOS:000904630900001
1	3	Gray, Jodie P.; Manuello, Jordi; Alexander-Bloch, Aaron F.; Leonardo, Cassandra; Franklin, Crystal; Choi, Ki Sueng; Cauda, Franco; Costa, Tommaso; Blangero, John; Glahn, David C.; Mayberg, Helen S.; Fox, Peter T.	Co-alteration Network Architecture of Major Depressive Disorder: A Multi-modal Neuroimaging Assessment of Large-scale Disease Effects	NEUROINFORMATICS	21	2	443	455		10.1007/s12021-022-09614-2	2023	WOS:000894483300001
1	3.0.2	Huang, Haiyue; Yan, Jin; Lin, Yinghong; Lin, Jiaxin; Hu, Huimin; Wei, Linxuan; Zhang, Xiwen; Zhang, Qingqing; Liang, Shengxiang	Brain functional activity of swallowing: A meta-analysis of functional magnetic resonance imaging	JOURNAL OF ORAL REHABILITATION	50	2	165	175		10.1111/joor.13397	2023	WOS:000892753200001
5	0.0.10	Lobo, Rosario Pintos; Bottenhorn, Katherine L.; Riedel, Michael C.; Toma, Afra I.; Hare, Megan M.; Smith, Donisha D.; Moor, Alexandra C.; Cowan, Isis K.; Valdes, Javier A.; Bartley, Jessica E.; Salo, Taylor; Boeving, Emily R.; Pankey, Brianna; Sutherland, Matthew T.; Musser, Erica D.; Laird, Angela R.	Neural systems underlying RDoC social constructs: An activation likelihood estimation meta-analysis	NEUROSCIENCE AND BIOBEHAVIORAL REVIEWS	144				104971	10.1016/j.neubiorev.2022.104971	2023	WOS:000900521700006
3	?	Ma, Huibin; Cao, Yikang; Li, Mengting; Zhan, Linlin; Xie, Zhou; Huang, Lina; Gao, Yanyan; Jia, Xize	Abnormal amygdala functional connectivity and deep learning classification in multifrequency bands in autism spectrum disorder: A multisite functional magnetic resonance imaging study	HUMAN BRAIN MAPPING	44	3	1094	1104		10.1002/hbm.26141	2023	WOS:000879811500001
1	3.0.2	Gao, Chuanji; Green, Jessica J.; Yang, Xuan; Oh, Sewon; Kim, Jongwan; Shinkareva, Svetlana, V	Audiovisual integration in the human brain: a coordinate-based meta-analysis	CEREBRAL CORTEX	33	9	5574	5584		10.1093/cercor/bhac443	2023	WOS:000879207800001
2	?	Graves, William W.; Purcell, Jeremy; Rothlein, David; Bolger, Donald J.; Rosenberg-Lee, Miriam; Staples, Ryan	Correspondence between cognitive and neural representations for phonology, orthography, and semantics in supramarginal compared to angular gyrus	BRAIN STRUCTURE & FUNCTION	228	1	255	271		10.1007/s00429-022-02590-y	2023	WOS:000878478000001
3	5.15	Cai, Mengjing; Liu, Jiawei; Wang, Xuexiang; Ma, Juanwei; Ma, Lin; Liu, Mengge; Zhao, Yao; Wang, He; Fu, Dianxun; Wang, Wenqin; Xu, Qiang; Guo, Lining; Liu, Feng	Spontaneous brain activity abnormalities in migraine: A meta-analysis of functional neuroimaging	HUMAN BRAIN MAPPING	44	2	571	584		10.1002/hbm.26085	2023	WOS:000858497200001
3	5.15	Duan, Weiwei; Liu, Xia; Ping, Liangliang; Jin, Shushu; Yu, Hao; Dong, Man; Xu, Fangfang; Li, Na; Li, Ying; Xu, Yinghong; Ji, Zhe; Cheng, Yuqi; Xu, Xiufeng; Zhou, Cong	Distinct functional brain abnormalities in insomnia disorder and obstructive sleep apnea	EUROPEAN ARCHIVES OF PSYCHIATRY AND CLINICAL NEUROSCIENCE	273	2	493	509		10.1007/s00406-022-01485-7	2023	WOS:000852986000002
1	3.0.2	Pierce, Jordan E.; Thomasson, Marine; Voruz, Philippe; Selosse, Garance; Peron, Julie	Explicit and Implicit Emotion Processing in the Cerebellum: A Meta-analysis and Systematic Review	CEREBELLUM	22	5	852	864		10.1007/s12311-022-01459-4	2023	WOS:000846736400001
1	3.0.2	Mauchand, Mael; Zhang, Shuyi	Disentangling emotional signals in the brain: an ALE meta-analysis of vocal affect perception	COGNITIVE AFFECTIVE & BEHAVIORAL NEUROSCIENCE	23	1	17	29		10.3758/s13415-022-01030-y	2023	WOS:000837910300001
2	?	Wang, Yezhou; Royer, Jessica; Park, Bo-Yong; de Wael, Reinder Vos; Lariviere, Sara; Tavakol, Shahin; Rodriguez-Cruces, Raul; Paquola, Casey; Hong, Seok-Jun; Margulies, Daniel S.; Smallwood, Jonathan; Valk, Sofie L.; Evans, Alan C.; Bernhardt, Boris C.	Long-range functional connections mirror and link microarchitectural and cognitive hierarchies in the human brain	CEREBRAL CORTEX	33	5	1782	1798		10.1093/cercor/bhac172	2023	WOS:000798361900001
3	6.21	Pico-Perez, Maria; Fullana, Miquel A.; Albajes-Eizagirre, Anton; Vega, Daniel; Marco-Pallares, Josep; Vilar, Ana; Chamorro, Jacobo; Felmingham, Kim L.; Harrison, Ben J.; Radua, Joaquim; Soriano-Mas, Carles	Neural predictors of cognitive-behavior therapy outcome in anxiety-related disorders: a meta-analysis of task-based fMRI studies	PSYCHOLOGICAL MEDICINE	53	8	3387	3395	PII S0033291721005444	10.1017/S0033291721005444	2023	WOS:000741164700001
1	3.0.2	Chen Y.; Li C.-S.R.	Appetitive and aversive cue reactivities differentiate neural subtypes of alcohol drinkers	Addiction Neuroscience	7				100089	10.1016/j.addicn.2023.100089	2023	2-s2.0-85174664565
3	5.15	Cao Y.; Tian F.; Zeng J.; Gong Q.; Yang X.; Jia Z.	The brain activity pattern in alcohol-use disorders under inhibition response Task	Journal of Psychiatric Research	163		127	134		10.1016/j.jpsychires.2023.05.009	2023	2-s2.0-85159563525
1	?	Sader M.; Waiter G.D.; Williams J.H.G.	The cerebellum plays more than one role in the dysregulation of appetite: Review of structural evidence from typical and eating disorder populations	Brain and Behavior	13	12			e3286	10.1002/brb3.3286	2023	2-s2.0-85173813272
1	3.0.2	Pierce Z.P.; Black J.M.	Default mode intranetwork resting-state functional connectivity is correlated with increased symptom severity in common anxiety disorders: A systematic review and meta-analysis	Journal of Affective Disorders Reports	14				100674	10.1016/j.jadr.2023.100674	2023	2-s2.0-85173850141
1	3.0.2	Arioli M.; Segatta C.; Papagno C.; Tettamanti M.; Cattaneo Z.	Social perception in deaf individuals: A meta-analysis of neuroimaging studies	Human Brain Mapping	44	16	5402	5415		10.1002/hbm.26444	2023	2-s2.0-85168576388
1	3.0.2	Grecucci A.; Orsini C.; Lapomarda G.; Sorella S.; Messina I.	Perceiving visual negative stimuli in schizophrenia and bipolar disorder: Meta-analytic evidence of a common altered thalamic-parahippocampal-basal ganglia circuit	Neuroimage: Reports	3	2			100173	10.1016/j.ynirp.2023.100173	2023	2-s2.0-85156267514
1	3.0.2	Bedini M.; Olivetti E.; Avesani P.; Baldauf D.	Accurate localization and coactivation profiles of the frontal eye field and inferior frontal junction: an ALE and MACM fMRI meta-analysis	Brain Structure and Function	228	2024-04-03	997	1017		10.1007/s00429-023-02641-y	2023	2-s2.0-85153383210
3	6.21	Percie du Sert O.; Unrau J.; Gauthier C.J.; Chakravarty M.; Malla A.; Lepage M.; Raucher-Chéné D.	Cerebral blood flow in schizophrenia: A systematic review and meta-analysis of MRI-based studies	Progress in Neuro-Psychopharmacology and Biological Psychiatry	121				110669	10.1016/j.pnpbp.2022.110669	2023	2-s2.0-85141337008
1	3.0.2	Li Y.; Liu X.; Jia X.; Li H.; Jia X.; Yang Q.	Structural and functional alterations in cerebral small vessel disease: an ALE-based meta-analysis	Cerebral Cortex	33	9	5484	5492		10.1093/cercor/bhac435	2023	2-s2.0-85159247974
3	5.15	Lin J.; Li L.; Pan N.; Liu X.; Zhang X.; Suo X.; Kemp G.J.; Wang S.; Gong Q.	Neural correlates of neuroticism: A coordinate-based meta-analysis of resting-state functional brain imaging studies	Neuroscience and Biobehavioral Reviews	146				105055	10.1016/j.neubiorev.2023.105055	2023	2-s2.0-85147124123
3	6.22	Qin B.; Liang S.; Tang S.; Liang H.; Zhang Y.; Liang Z.	Altered Spontaneous Brain Activity in Cirrhotic Patients with Minimal Hepatic Encephalopathy: A Meta-Analysis of Resting-State Functional Imaging	Brain Sciences	13	6			960	10.3390/brainsci13060960	2023	2-s2.0-85163759213
2,3	Neurosynth: ?; SDM-PSI: 6.21	Pan N.; Wang S.; Qin K.; Li L.; Chen Y.; Zhang X.; Lai H.; Suo X.; Long Y.; Yu Y.; Ji S.; Radua J.; Sweeney J.A.; Gong Q.	Common and Distinct Neural Patterns of Attention-Deficit/Hyperactivity Disorder and Borderline Personality Disorder: A Multimodal Functional and Structural Meta-analysis	Biological Psychiatry: Cognitive Neuroscience and Neuroimaging	8	6	640	650		10.1016/j.bpsc.2022.06.003	2023	2-s2.0-85134761900
2	?	Klugah-Brown B.; Wang P.; Jiang Y.; Becker B.; Hu P.; Uddin L.Q.; Biswal B.	Structural-functional connectivity mapping of the insular cortex: A combined data-driven and meta-Analytic topic mapping	Cerebral Cortex	33	5	1726	1738		10.1093/cercor/bhac168	2023	2-s2.0-85149180625
3	6.21	Pisani S.; Gunasekera B.; Lu Y.; Vignando M.; ffytche D.; Aarsland D.; Chaudhuri K.R.; Ballard C.; Lee J.-Y.; Kim Y.K.; Velayudhan L.; Bhattacharyya S.	Grey matter volume loss in Parkinson's disease psychosis and its relationship with serotonergic gene expression: A meta-analysis	Neuroscience and Biobehavioral Reviews	147				105081	10.1016/j.neubiorev.2023.105081	2023	2-s2.0-85148365790
3	5.15	Zhao M.; Hao Z.; Li M.; Xi H.; Hu S.; Wen J.; Gao Y.; Antwi C.O.; Jia X.; Yu Y.; Ren J.	Functional changes of default mode network and structural alterations of gray matter in patients with irritable bowel syndrome: a meta-analysis of whole-brain studies	Frontiers in Neuroscience	17				1236069	10.3389/fnins.2023.1236069	2023	2-s2.0-85175786567
1	3.0.2	Yan H.; Wu H.; Cai Z.; Du S.; Li L.; Xu B.; Chang C.; Wang N.	The neural correlates of apathy in the context of aging and brain disorders: a meta-analysis of neuroimaging studies	Frontiers in Aging Neuroscience	15				1181558	10.3389/fnagi.2023.1181558	2023	2-s2.0-85164430680
1	3.0.2	Sartin S.; Ranzini M.; Scarpazza C.; Monaco S.	Cortical areas involved in grasping and reaching actions with and without visual information: An ALE meta-analysis of neuroimaging studies	Current Research in Neurobiology	4				100070	10.1016/j.crneur.2022.100070	2023	2-s2.0-85174664872
1	3.0.2	Thakral P.P.; Starkey C.C.; Devitt A.L.; Schacter D.L.	Are False Memory and Creative Thinking Mediated by Common Neural Substrates? An fMRI Meta-Analysis	Creativity Research Journal						10.1080/10400419.2023.2269356	2023	2-s2.0-85175459123
2	?	Cosme D.; Lopez R.B.	Neural indicators of food cue reactivity, regulation, and valuation and their associations with body composition and daily eating behavior	Social Cognitive and Affective Neuroscience	18	1			nsaa155	10.1093/scan/nsaa155	2023	2-s2.0-85160263413
2	?	Chan H.-Y.; Boksem M.A.S.; Venkatraman V.; Dietvorst R.C.; Scholz C.; Vo K.; Falk E.B.; Smidts A.	Neural Signals of Video Advertisement Liking: Insights into Psychological Processes and Their Temporal Dynamics	Journal of Marketing Research						10.1177/00222437231194319	2023	2-s2.0-85173460287
1	2.3.6	Young I.M.; Dadario N.B.; Tanglay O.; Chen E.; Cook B.; Taylor H.M.; Crawford L.; Yeung J.T.; Nicholas P.J.; Doyen S.; Sughrue M.E.	Connectivity model of the anatomic substrates and network abnormalities in major depressive disorder: A coordinate meta-analysis of resting-state functional connectivity	Journal of Affective Disorders Reports	11				100478	10.1016/j.jadr.2023.100478	2023	2-s2.0-85147129086
1	?	Liu, Xia; Zheng, Guowei; Wang, Xiuzhen; Li, Yongchao; Ji, Shanling; Zhang, Yu; Yao, Chaofan; Zhang, Yinghui; Hu, Bin	The brain activation of anxiety disorders with emotional stimuli-an fMRI ALE meta-analysis	NEUROCASE	28	5	448	457		10.1080/13554794.2022.2160262	2022	WOS:000901375600001
1	3.0.2	Gao, Zhen; Cui, Mengjie; Zhang, Jing; Ji, Laixi	Activation likelihood estimation identifies brain regions activated during puncturing at <i>Hegu </i>in healthy volunteers: A meta-analysis	FRONTIERS IN NEUROSCIENCE	16				1084362	10.3389/fnins.2022.1084362	2022	WOS:000908050300001
1	3.0.2	Cera, Nicoletta; Monteiro, Jessica; Esposito, Roberto; Di Francesco, Giulia; Cordes, Dietmar; Caldwell, Jessica Z. K.; Cieri, Filippo	Neural correlates of psychodynamic and non-psychodynamic therapies in different clinical populations through fMRI: A meta-analysis and systematic review	FRONTIERS IN HUMAN NEUROSCIENCE	16				1029256	10.3389/fnhum.2022.1029256	2022	WOS:000911964800001
1	3.0.2	Yeung, Andy Wai Kan	Neural correlates of food labels on brand, nature, and nutrition: An fMRI meta-analysis	FRONTIERS IN NUTRITION	9				1056692	10.3389/fnut.2022.1056692	2022	WOS:000906741600001
1	?	Yu, Zheng; Wang, Rong-Rong; Wei, Wei; Liu, Li-Ying; Wen, Chuan-Biao; Yu, Shu-Guang; Guo, Xiao-Li; Yang, Jie	A coordinate-based meta-analysis of acupuncture for chronic pain: Evidence from fMRI studies	FRONTIERS IN NEUROSCIENCE	16				1049887	10.3389/fnins.2022.1049887	2022	WOS:000904680900001
1	3.0.2	Lee, Dong Hyuk; Kwon, Bo-In; Yu, Jun-Sang; Park, Sang Kyun; Kim, Joo-Hee	Neural mechanisms underlying peripheral facial nerve palsy: A protocol for systematic review and meta-analysis of neuroimaging studies	MEDICINE	101	48				10.1097/MD.0000000000032110	2022	WOS:000895502600116
2	?	Gonsalves, Meghan A.; Beck, Quincy M.; Fukuda, Andrew M.; Tirrell, Eric; Kokdere, Fatih; Kronenberg, Eugenia F.; Iadarola, Nicolas D.; Hagberg, Sean; Carpenter, Linda L.; Barredo, Jennifer	Mechanical Affective Touch Therapy for Anxiety Disorders: Effects on Resting State Functional Connectivity	NEUROMODULATION	25	8	1431	1442		10.1016/j.neurom.2021.10.007	2022	WOS:000897987800004
1	3.0.2	Cao, Huiling; Lin, Feng; Ke, Ben; Song, Jianling; Xue, Yuting; Fang, Xiangdong; Zeng, Erming	Alterations of amplitude of low-frequency fluctuations and fractional amplitude of low-frequency fluctuations in end-stage renal disease on maintenance dialysis: An activation likelihood estimation meta-analysis	FRONTIERS IN HUMAN NEUROSCIENCE	16				1040553	10.3389/fnhum.2022.1040553	2022	WOS:000898074300001
3	6.21	Krishnamurthy, Karthikeyan; Chan, Melody M. Y.; Han, Yvonne M. Y.	Neural substrates underlying effortful control deficit in autism spectrum disorder: a meta-analysis of fMRI studies	SCIENTIFIC REPORTS	12	1				10.1038/s41598-022-25051-2	2022	WOS:000955946400074
1	3.0.2	Chen, Yu; Chaudhary, Shefali; Li, Chiang-Shan R.	Shared and distinct neural activity during anticipation and outcome of win and loss: A meta-analysis of the monetary incentive delay task	NEUROIMAGE	264				119764	10.1016/j.neuroimage.2022.119764	2022	WOS:000904088400005
2	?	Ouin, Elisa; Roussel, Martine; Aarabi, Ardalan; Arnoux, Audrey; Tasseel-Ponche, Sophie; Andriuta, Daniela; de Schotten, Michel Thiebaut; Toba, Monica N.; Makki, Malek; Godefroy, Olivier	Poststroke action slowing: Motor and attentional impairments and their imaging determinants. Evidence from lesion-symptom mapping, disconnection and fMRI activation studies	NEUROPSYCHOLOGIA	177				108401	10.1016/j.neuropsychologia.2022.108401	2022	WOS:000932424200009
2	?	Kuang, Qijie; Zhou, Sumiao; Li, Haijing; Mi, Lin; Zheng, Yingjun; She, Shenglin	Association between fractional amplitude of low-frequency fluctuation (fALFF) and facial emotion recognition ability in first-episode schizophrenia patients: a fMRI study	SCIENTIFIC REPORTS	12	1			19561	10.1038/s41598-022-24258-7	2022	WOS:000885139000014
3	6.21	Cai, Mengjing; Wang, Rui; Liu, Mengge; Du, Xiaotong; Xue, Kaizhong; Ji, Yuan; Wang, Zirui; Zhang, Yijing; Guo, Lining; Qin, Wen; Zhu, Wenshuang; Fu, Jilian; Liu, Feng	Disrupted local functional connectivity in schizophrenia: An updated and extended meta-analysis	SCHIZOPHRENIA	8	1			93	10.1038/s41537-022-00311-2	2022	WOS:000888584800001
1	?	Chen, Zhu-Hong; Cui, Yu-Ling; Sun, Jing-Ting; Li, Yu-Ting; Zhang, Chi; Zhang, Yang-Ming; Li, Ze-Yang; Shang, Yu-Xuan; Ni, Min-Hua; Hu, Bo; Yan, Lin-Feng; Wang, Wen	The brain structure and function abnormalities of migraineurs: A systematic review and neuroimaging meta-analysis	FRONTIERS IN NEUROLOGY	13				1022793	10.3389/fneur.2022.1022793	2022	WOS:000889180200001
2	?	Biel, Davina; Luan, Ying; Brendel, Matthias; Hager, Paul; Dewenter, Anna; Moscoso, Alexis; Svaldi, Diana Otero; Higgins, Ixavier A.; Pontecorvo, Michael; Roemer, Sebastian; Steward, Anna; Rubinski, Anna; Zheng, Lukai; Schoell, Michael; Shcherbinin, Sergey; Ewers, Michael; Franzmeier, Nicolai	Combining tau-PET and fMRI meta-analyses for patient-centered prediction of cognitive decline in Alzheimer's disease	ALZHEIMERS RESEARCH & THERAPY	14	1			166	10.1186/s13195-022-01105-5	2022	WOS:000879776000001
3	6.21	Monteiro, Jessica; Castelhano, Joao; Pignatelli, Duarte; Tartaro, Armando; Cera, Nicoletta	Do Psychogenic Erectile Dysfunction and Premature Ejaculation Share a Neural Circuit? Evidence from a fMRI Systematic Review and Meta-Analysis	APPLIED SCIENCES-BASEL	12	21			11249	10.3390/app122111249	2022	WOS:000880942100001
3	?	Wang, Zuxing; Zou, Zhili; Xiao, Jun; Wang, Peijia; Luo, Yuanyuan; Min, Wenjiao; He, Ying; Yuan, Cui; Su, Yihan; Yang, Chenghui; Chang, Fan; Zhu, Hongru	Task-related neural activation abnormalities in patients with remitted major depressive disorder: A coordinate-based meta-analysis	NEUROSCIENCE AND BIOBEHAVIORAL REVIEWS	143				104929	10.1016/j.neubiorev.2022.104929	2022	WOS:000883414300007
2	?	Ju, Uijong	Identifying neural correlates of multidimensional, subjective gaming experiences during active gameplay	FRONTIERS IN HUMAN NEUROSCIENCE	16				1013991	10.3389/fnhum.2022.1013991	2022	WOS:000883923600001
1	?	Al Qawasmeh, Majdi; Ahmed, Yaman B.; Al-Bzour, Ayah N.; Al-Majali, Ghayda'a N.; Alzghoul, Saja M.; Al-Khalili, Anas A.; Ibrahim, Ruaa B.; Hamza, Ammar, I; Al-Mannai, Ramaz S.; Refaie, Haneen; Alhayek, Kefah; Kofahi, Raed; Leffler, Alexandra; El Salem, Khalid	Meta-analytical evidence of functional and structural abnormalities associated with pain processing in migraine patients: An activation likelihood estimation	MEDICINE	101	43			e31206	10.1097/MD.0000000000031206	2022	WOS:000877294300032
3	5.15	Niu, Xiaoyu; Gao, Xinyu; Zhang, Mengzhe; Yang, Zhengui; Yu, Miaomiao; Wang, Weijian; Wei, Yarui; Cheng, Jingliang; Han, Shaoqiang; Zhang, Yong	Meta-analysis of structural and functional brain alterations in internet gaming disorder	FRONTIERS IN PSYCHIATRY	13				1029344	10.3389/fpsyt.2022.1029344	2022	WOS:000964516500001
1,16	GingerALE: 3.0.2; NeuRoi: ?	Ferraro, Stefania; Klugah-Brown, Benjamin; Tench, Christopher R.; Bazinet, Vincent; Bore, Mercy Chepngetich; Nigri, Anna; Demichelis, Greta; Bruzzone, Maria Grazia; Palermo, Sara; Zhao, Weihua; Yao, Shuxia; Jiang, Xi; Kendrick, Keith M.; Becker, Benjamin	The central autonomic system revisited - Convergent evidence for a regulatory role of the insular and midcingulate cortex from neuroimaging meta-analyses	NEUROSCIENCE AND BIOBEHAVIORAL REVIEWS	142				104915	10.1016/j.neubiorev.2022.104915	2022	WOS:000960965700010
2	?	Siman-Tov, Tali; Gordon, Carlos R.; Avisdris, Netanell; Shany, Ofir; Lerner, Avigail; Shuster, Omer; Granot, Roni Y.; Hendler, Talma	The rediscovered motor-related area 55b emerges as a core hub of music perception	COMMUNICATIONS BIOLOGY	5	1			1104	10.1038/s42003-022-04009-0	2022	WOS:000869848800001
3	5.15	Huang, Xiang; Zhang, Meng; Li, Boyi; Shang, Huifang; Yang, Jing	Structural and functional brain abnormalities in idiopathic cervical dystonia: A multimodal meta-analysis	PARKINSONISM & RELATED DISORDERS	103		153	165		10.1016/j.parkreldis.2022.08.029	2022	WOS:000884490700002
3	5.15	Zeng, Jianguang; Yan, Jiangnan; Cao, Hengyi; Su, Yueyue; Song, Yuan; Luo, Ya; Yang, Xun	Neural substrates of reward anticipation and outcome in schizophrenia: a meta-analysis of fMRI findings in the monetary incentive delay task	TRANSLATIONAL PSYCHIATRY	12	1			448	10.1038/s41398-022-02201-8	2022	WOS:000868459100001
2	?	Yin, Yu; Wang, Fuqin; Yang, Yang; Tian, Maoqiang; Gao, Lei; Liu, Heng	Abnormalities of hemispheric specialization in drug-na?ve and drug-receiving self-limited epilepsy with centrotemporal spikes	EPILEPSY & BEHAVIOR	136				108940	10.1016/j.yebeh.2022.108940	2022	WOS:000874579800006
3	?	Schrammen, Elisabeth; Roesmann, Kati; Rosenbaum, David; Redlich, Ronny; Harenbrock, Jana; Dannlowski, Udo; Leehr, Elisabeth J.	Functional neural changes associated with psychotherapy in anxiety disorders - A meta-analysis of longitudinal fMRI studies	NEUROSCIENCE AND BIOBEHAVIORAL REVIEWS	142				104895	10.1016/j.neubiorev.2022.104895	2022	WOS:000886542400005
1	3.0.2	Penagos-Corzo, Julio C.; Cosio van-Hasselt, Michelle; Escobar, Daniela; Vazquez-Roque, Ruben A.; Flores, Gonzalo	Mirror neurons and empathy-related regions in psychopathy: Systematic review, meta-analysis, and a working model	SOCIAL NEUROSCIENCE	17	5	462	479		10.1080/17470919.2022.2128868	2022	WOS:000863863400001
3	6.21	Hammond, Christopher J.; Allick, Aliyah; Park, Grace; Rizwan, Bushra; Kim, Kwon; Lebo, Rachael; Nanavati, Julie; Parvaz, Muhammad; Ivanov, Iliyan	A Meta-Analysis of fMRI Studies of Youth Cannabis Use: Alterations in Executive Control, Social Cognition/Emotion Processing, and Reward Processing in Cannabis Using Youth	BRAIN SCIENCES	12	10			1281	10.3390/brainsci12101281	2022	WOS:000872727500001
1	2.3.6	Yuan, Jixiang; Yu, Hua; Yu, Minglan; Liang, Xuemei; Huang, Chaohua; He, Rongfang; Lei, Wei; Chen, Jing; Chen, Jianning; Tan, Youguo; Liu, Kezhi; Zhang, Tao; Luo, Huairong; Xiang, Bo	Altered spontaneous brain activity in major depressive disorder: An activation likelihood estimation meta-analysis	JOURNAL OF AFFECTIVE DISORDERS	314		19	26		10.1016/j.jad.2022.06.014	2022	WOS:000910864800002
1	3.0.2	Feng, Shuqing; Zhang, Meng; Peng, Yunwen; Yang, Shiyan; Wang, Yufeng; Wu, Xin; Zou, Feng	Brain networks under uncertainty: A coordinate-based meta-analysis of brain imaging studies	JOURNAL OF AFFECTIVE DISORDERS	319		627	637		10.1016/j.jad.2022.09.099	2022	WOS:000870046800027
1	2.3.6	Zhu, Tingting; Wang, Zixu; Zhou, Chao; Fang, Xinyu; Huang, Chengbing; Xie, Chunming; Ge, Honglin; Yan, Zheng; Zhang, Xiangrong; Chen, Jiu	Meta-analysis of structural and functional brain abnormalities in schizophrenia with persistent negative symptoms using activation likelihood estimation	FRONTIERS IN PSYCHIATRY	13				957685	10.3389/fpsyt.2022.957685	2022	WOS:000875433300001
2	?	Zhou, Liu-Fang; Zhao, Dan; Cui, Xuan; Guo, Bingbing; Zhu, Fangwei; Feng, Chunliang; Wang, Jinhui; Meng, Ming	Separate neural subsystems support goal-directed speech listening	NEUROIMAGE	263				119613	10.1016/j.neuroimage.2022.119613	2022	WOS:000870701300009
3	6.21	Ma, Shiqi; Huang, Haipeng; Zhong, Zhen; Zheng, Haizhu; Li, Mengyuan; Yao, Lin; Yu, Bin; Wang, Hongfeng	Effect of acupuncture on brain regions modulation of mild cognitive impairment: A meta-analysis of functional magnetic resonance imaging studies	FRONTIERS IN AGING NEUROSCIENCE	14				914049	10.3389/fnagi.2022.914049	2022	WOS:000875315900001
1	3.0.2	Ganesan, Saampras; Beyer, Emillie; Moffat, Bradford; Van Dam, Nicholas T.; Lorenzetti, Valentina; Zalesky, Andrew	Focused attention meditation in healthy adults: A systematic review and meta-analysis of cross-sectional functional MRI studies	NEUROSCIENCE AND BIOBEHAVIORAL REVIEWS	141				104846	10.1016/j.neubiorev.2022.104846	2022	WOS:000861813300007
1	3.0.2	Krane, N. A.; Loyo, M.; Pollock, J.; Hill, M.; Johnson, C. Z.; Stevens, A. A.	Exploratory Study of the Brain Response in Facial Synkinesis after Bell Palsy with Systematic Review and Meta-analysis of the Literature	AMERICAN JOURNAL OF NEURORADIOLOGY	43	10	1470	1475		10.3174/ajnr.A7619	2022	WOS:000859475700001
1	?	Zapparoli, Laura; Devoto, Francantonio; Giannini, Gianluigi; Zonca, Sara; Gallo, Francesca; Paulesu, Eraldo	Neural structural abnormalities behind altered brain activation in obesity: Evidence from meta-analyses of brain activation and morphometric data	NEUROIMAGE-CLINICAL	36				103179	10.1016/j.nicl.2022.103179	2022	WOS:000859708600001
2	?	Liu, Lu; Lyu, Tian-Li; Fu, Ming-Yang; Wang, Lin-Peng; Chen, Ying; Hong, Jia-Hui; Chen, Qiu-Yi; Zhu, Yu-Pu; Tan, Zhong-Jian; Liu, Da-Peng; Chen, Zi-Wei; Kong, Ya-Zhuo; Li, Bin	Changes in brain connectivity linked to multisensory processing of pain modulation in migraine with acupuncture treatment	NEUROIMAGE-CLINICAL	36				103168	10.1016/j.nicl.2022.103168	2022	WOS:000863158500002
3	5.15	Yang, Xun; Su, Yueyue; Yang, Fan; Song, Yuan; Yan, Jiangnan; Luo, Ya; Zeng, Jianguang	Neurofunctional mapping of reward anticipation and outcome for major depressive disorder: a voxel-based meta-analysis	PSYCHOLOGICAL MEDICINE	52	15	3309	3322	PII S0033291722002707	10.1017/S0033291722002707	2022	WOS:000849220900001
3	?	Gao, Yanyan; Sun, Jiawei; Cheng, Lulu; Yang, Qihang; Li, Jing; Hao, Zeqi; Zhan, Linlin; Shi, Yuyu; Li, Mengting; Jia, Xize; Li, Huayun	Altered resting state dynamic functional connectivity of amygdala subregions in patients with autism spectrum disorder: A multi-site fMRI study	JOURNAL OF AFFECTIVE DISORDERS	312		69	77		10.1016/j.jad.2022.06.011	2022	WOS:000823045100007
1	3.0.2	Yan, Haifeng; Lau, Way K. W.; Eickhoff, Simon B.; Long, Jixin; Song, Xiaoqi; Wang, Chanyu; Zhao, Jiubo; Feng, Xiangang; Huang, Ruiwang; Wang, Maosheng; Zhang, Xiaoyuan; Zhang, Ruibin	Charting the neural circuits disruption in inhibitory control and its subcomponents across psychiatric disorders: A neuroimaging meta-analysis	PROGRESS IN NEURO-PSYCHOPHARMACOLOGY & BIOLOGICAL PSYCHIATRY	119				110618	10.1016/j.pnpbp.2022.110618	2022	WOS:000860464600005
3	6.21	Li, Ze-Yang; Ma, Teng; Yu, Ying; Hu, Bo; Han, Yu; Xie, Hao; Ni, Min-Hua; Chen, Zhu-Hong; Zhang, Yang-Ming; Huang, Yu-Xiang; Li, Wen-Hua; Wang, Wen; Yan, Lin-Feng; Cui, Guang-Bin	Changes of brain function in patients with type 2 diabetes mellitus measured by different analysis methods: A new coordinate-based meta-analysis of neuroimaging	FRONTIERS IN NEUROLOGY	13				923310	10.3389/fneur.2022.923310	2022	WOS:000850776100001
1	?	Bosulu, Juvenal; Allaire, Max-Antoine; Tremblay-Grenier, Laurence; Luo, Yi; Eickhoff, Simon; Hetu, Sebastien	Wanting versus "needing" related value: An fMRI meta-analysis	BRAIN AND BEHAVIOR	12	9			e2713	10.1002/brb3.2713	2022	WOS:000843693500001
1	3.0.2	Guida, Pasqualina; Michiels, Mario; Redgrave, Peter; Luque, David; Obeso, Ignacio	An fMRI meta-analysis of the role of the striatum in everyday-life vs laboratory-developed habits	NEUROSCIENCE AND BIOBEHAVIORAL REVIEWS	141				104826	10.1016/j.neubiorev.2022.104826	2022	WOS:000874773700013
1	3.0.2	Cattarinussi, Giulia; Kubera, Katharina M.; Hirjak, Dusan; Wolf, Robert C.; Sambataro, Fabio	Neural Correlates of the Risk for Schizophrenia and Bipolar Disorder: A Meta-analysis of Structural and Functional Neuroimaging Studies	BIOLOGICAL PSYCHIATRY	92	5	375	384		10.1016/j.biopsych.2022.02.960	2022	WOS:000885331700005
4	?	Long, Jixin; Song, Xiaoqi; Wang, You; Wang, Chanyu; Huang, Ruiwang; Zhang, Ruibin	Distinct neural activation patterns of age in subcomponents of inhibitory control: A fMRI meta-analysis	FRONTIERS IN AGING NEUROSCIENCE	14				938789	10.3389/fnagi.2022.938789	2022	WOS:000843483000001
1	?	Gombaut, Cindy; Holmes, Scott A.	Sensorimotor Integration and Pain Perception: Mechanisms Integrating Nociceptive Processing. A Systematic Review and ALE-Meta Analysis	FRONTIERS IN INTEGRATIVE NEUROSCIENCE	16				931292	10.3389/fnint.2022.931292	2022	WOS:000843184200001
4	?	Nikolic, Maja; Pezzoli, Patrizia; Jaworska, Natalia; Seto, Michael C.	Brain responses in aggression-prone individuals: A systematic review and meta-analysis of functional magnetic resonance imaging (fMRI) studies of anger- and aggression-eliciting tasks	PROGRESS IN NEURO-PSYCHOPHARMACOLOGY & BIOLOGICAL PSYCHIATRY	119				110596	10.1016/j.pnpbp.2022.110596	2022	WOS:000844864100003
3	5.15	Gunasekera, Brandon; Davies, Cathy; Blest-Hopley, Grace; Veronese, Mattia; Ramsey, Nick F.; Bossong, Matthijs G.; Radua, Joaquim; Bhattacharyya, Sagnik	Task-independent acute effects of delta-9-tetrahydrocannabinol on human brain function and its relationship with cannabinoid receptor gene expression: A neuroimaging meta-regression analysis	NEUROSCIENCE AND BIOBEHAVIORAL REVIEWS	140				104801	10.1016/j.neubiorev.2022.104801	2022	WOS:000851378200007
1	?	Qiu, Xiaolei; Zhang, Rongrong; Wen, Lu; Jiang, Fuli; Mao, Hongjun; Yan, Wei; Xie, Shiping; Pan, Xinming	Alterations in Spontaneous Brain Activity in Drug-Na?ve First-Episode Schizophrenia: An Anatomical/Activation Likelihood Estimation Meta-Analysis	PSYCHIATRY INVESTIGATION	19	8	606	+		10.30773/pi.2022.0074	2022	WOS:000848419400002
1	?	Zheng, Sisi; Song, Nan; Wang, Sici; Ning, Yanzhe; Zhu, Hong; Song, Mingkang; Jia, Yuan; Jia, Hongxiao	Potential Targets for Noninvasive Brain Stimulation on Depersonalization-Derealization Disorder	BRAIN SCIENCES	12	8			1112	10.3390/brainsci12081112	2022	WOS:000847159400001
1	3.0.2	Zhang, Ning; Yin, Yulong; Jiang, Yuchen; Huang, Chenxu	Reinvestigating the Neural Bases Involved in Speech Production of Stutterers: An ALE Meta-Analysis	BRAIN SCIENCES	12	8			1030	10.3390/brainsci12081030	2022	WOS:000846145800001
2	?	Cirillo, Sara; Battistella, Giovanni; Castellano, Antonella; Sanvito, Francesco; Iadanza, Antonella; Bailo, Michele; Barzaghi, Raffaella Lina; Acerno, Stefania; Mortini, Pietro; Gorno-Tempini, Maria Luisa; Mandelli, Maria Luisa; Falini, Andrea	Comparison between inferior frontal gyrus intrinsic connectivity network and verb-generation task fMRI network for presurgical language mapping in healthy controls and in glioma patients	BRAIN IMAGING AND BEHAVIOR	16	6	2569	2585		10.1007/s11682-022-00712-y	2022	WOS:000833449700001
1	3.0.2	Kuang, Changyi; Chen, Jun; Chen, Jiawen; Shi, Yafei; Huang, Huiyuan; Jiao, Bingqing; Lin, Qiwen; Rao, Yuyang; Liu, Wenting; Zhu, Yunpeng; Mo, Lei; Ma, Lijun; Lin, Jiabao	Uncovering neural distinctions and commodities between two creativity subsets: A meta-analysis of fMRI studies in divergent thinking and insight using activation likelihood estimation	HUMAN BRAIN MAPPING	43	16	4864	4885		10.1002/hbm.26029	2022	WOS:000832968300001
3	5.15	Long, Xipeng; Wang, Xiuli; Tian, Fangfang; Cao, Yuan; Xie, Hongsheng; Jia, Zhiyun	Altered brain activation during reward anticipation in bipolar disorder	TRANSLATIONAL PSYCHIATRY	12	1			300	10.1038/s41398-022-02075-w	2022	WOS:000832714700001
1	3.0.2	Tan, Yafei; Yan, Ranran; Gao, Yuan; Zhang, Meng; Northoff, Georg	Spatial-topographic nestedness of interoceptive regions within the networks of decision making and emotion regulation: Combining ALE meta-analysis and MACM analysis	NEUROIMAGE	260				119500	10.1016/j.neuroimage.2022.119500	2022	WOS:000868588800010
3	6.22	Huang, Haoming; Yue, Xiaomei; Huang, Xi; Long, Wenjie; Kang, Shangyu; Rao, Yawen; Zeng, Jingchun; Zuo, Junling; Wang, Lin; Li, Hongjuan; Wang, Yeqing; Qiu, Shijun; Zhao, Weixuan	Brain Activities Responding to Acupuncture at ST36 (zusanli) in Healthy Subjects: A Systematic Review and Meta-Analysis of Task-Based fMRI Studies	FRONTIERS IN NEUROLOGY	13				930753	10.3389/fneur.2022.930753	2022	WOS:000840744100001
1	3.0.2	Ha, Guodong; Tian, Zilei; Chen, Jiyao; Wang, Shuo; Luo, Aga; Liu, Yunyu; Tang, Juan; Lai, Ningyuan; Zeng, Fang; Lan, Lei	Coordinate-based (ALE) meta-analysis of acupuncture for musculoskeletal pain	FRONTIERS IN NEUROSCIENCE	16				906875	10.3389/fnins.2022.906875	2022	WOS:000837182400001
99		Zhu, Jingwen; Qiu, Anqi	Interindividual variability in functional connectivity discovers differential development of cognition and transdiagnostic dimensions of psychopathology in youth	NEUROIMAGE	260				119482	10.1016/j.neuroimage.2022.119482	2022	WOS:000843953200010
1	3.0.2	Dahlen, Amelia D.; Schofield, Aphra; Schioth, Helgi B.; Brooks, Samantha J.	Subliminal Emotional Faces Elicit Predominantly Right-Lateralized Amygdala Activation: A Systematic Meta-Analysis of fMRI Studies	FRONTIERS IN NEUROSCIENCE	16				868366	10.3389/fnins.2022.868366	2022	WOS:000834570200001
3	5.15	Hao, Zeqi; Shi, Yuyu; Huang, Lina; Sun, Jiawei; Li, Mengting; Gao, Yanyan; Li, Jing; Wang, Qianqian; Zhan, Linlin; Ding, Qingguo; Jia, Xize; Li, Huayun	The Atypical Effective Connectivity of Right Temporoparietal Junction in Autism Spectrum Disorder: A Multi-Site Study	FRONTIERS IN NEUROSCIENCE	16				927556	10.3389/fnins.2022.927556	2022	WOS:000834586500001
1	3.0.2	Gu, Lihua; Shu, Hao; Xu, Hui; Wang, Yanjuan	Functional brain changes in Parkinson's disease: a whole brain ALE study	NEUROLOGICAL SCIENCES	43	10	5909	5916		10.1007/s10072-022-06272-9	2022	WOS:000825905600004
1	3.0.2	Sacheli, Lucia Maria; Tomasetig, Giulia; Musco, Margherita Adelaide; Pizzi, Stefano; Bottini, Gabriella; Pizzamiglio, Luigi; Paulesu, Eraldo	The unexplored link between aesthetic perception and creativity: A theory-driven meta-analysis of fMRI studies in the visual domain	NEUROSCIENCE AND BIOBEHAVIORAL REVIEWS	140				104768	10.1016/j.neubiorev.2022.104768	2022	WOS:000877423000001
2	?	DeMarco, Andrew Tesla; van der Stelt, Candace; Paul, Sachi; Dvorak, Elizabeth; Lacey, Elizabeth; Snider, Sarah; Turkeltaub, Peter E.	Absence of Perilesional Neuroplastic Recruitment in Chronic Poststroke Aphasia	NEUROLOGY	99	2	E119	E128		10.1212/WNL.0000000000200382	2022	WOS:000821634500017
1	3.0.2	Hazra, Sandipan; Handa, Gita; Nayak, Prasunpriya; Sahu, Samantak; Sarkar, Kaushik; Venkataraman, Srikumar	A Dysfunctional Descending Pain Modulation System in Chronic Nonspecific Low Back Pain: A Systematic Review and ALE Meta-Analysis	NEUROLOGY INDIA	70	4	1344	1360		10.4103/0028-3886.355137	2022	WOS:000927178800005
17	?	Gamboa, Olga Lucia; Hu Chuan-Peng; Salas, Christian E.; Yuen, Kenneth S. L.	Obliviate! Reviewing Neural Fundamentals of Intentional Forgetting from a Meta-Analytic Perspective	BIOMEDICINES	10	7			1555	10.3390/biomedicines10071555	2022	WOS:000833807200001
4	?	Taebi, Arezoo; Becker, Benjamin; Klugah-Brown, Benjamin; Roecher, Erik; Biswal, Bharat; Zweerings, Jana; Mathiak, Klaus	Shared network-level functional alterations across substance use disorders: A multi-level kernel density meta-analysis of resting-state functional connectivity studies	ADDICTION BIOLOGY	27	4			e13200	10.1111/adb.13200	2022	WOS:000813422600001
3	5.15	Dang, Jinghan; Tao, Qiuying; Niu, Xiaoyu; Zhang, Mengzhe; Gao, Xinyu; Yang, Zhengui; Yu, Miaomiao; Wang, Weijian; Han, Shaoqiang; Cheng, Jingliang; Zhang, Yong	Meta-Analysis of Structural and Functional Brain Abnormalities in Cocaine Addiction	FRONTIERS IN PSYCHIATRY	13				927075	10.3389/fpsyt.2022.927075	2022	WOS:000828089100001
1	2.3.6	Wu, Jinlong; Xiao, Wen; Yip, Joanne; Peng, Li; Zheng, Kangyong; Bentil, Obed Takyi; Ren, Zhanbing	Effects of Exercise on Neural Changes in Inhibitory Control: An ALE Meta-Analysis of fMRI Studies	FRONTIERS IN HUMAN NEUROSCIENCE	16				891095	10.3389/fnhum.2022.891095	2022	WOS:000828102800001
3	6.21	Qiu, Zeguo; Lei, Xue; Becker, Stefanie, I; Pegna, Alan J.	Neural activities during the Processing of unattended and unseen emotional faces: a voxel-wise Meta-analysis	BRAIN IMAGING AND BEHAVIOR	16	5	2426	2443		10.1007/s11682-022-00697-8	2022	WOS:000814919400001
1	2.3.6	Briggs, Robert G.; Young, Isabella M.; Dadario, Nicholas B.; Fonseka, R. Dineth; Hormovas, Jorge; Allan, Parker; Larsen, Micah L.; Lin, Yueh-Hsin; Tanglay, Onur; Maxwell, B. David; Conner, Andrew K.; Stafford, Jordan F.; Glenn, Chad A.; Teo, Charles; Sughrue, Michael E.	Parcellation-based tractographic modeling of the salience network through meta-analysis	BRAIN AND BEHAVIOR	12	7			e2646	10.1002/brb3.2646	2022	WOS:000814401300001
1,3	GingerALE: 3.0.2; SDM-PSI: 6.22	Masharipov, Ruslan; Korotkov, Alexander; Medvedev, Svyatoslav; Kireev, Maxim	Evidence for non-selective response inhibition in uncertain contexts revealed by combined meta-analysis and Bayesian analysis of fMRI data	SCIENTIFIC REPORTS	12	1			10137	10.1038/s41598-022-14221-x	2022	WOS:000812562700039
1	3.0.2	Watanuki, Shinya; Akama, Hiroyuki	Neural substrates of brand equity: applying a quantitative meta-analytical method for neuroimage studies	HELIYON	8	6			e09702	10.1016/j.heliyon.2022.e09702	2022	WOS:000830779200002
3	5	Soldevila-Matias, Pau; Albajes-Eizagirre, Anton; Radua, Joaquim; Garcia-Marti, Gracian; Rubio, Jose M.; Tordesillas-Gutierrez, Diana; Fuentes-Dura, Inmaculada; Solanes, Aleix; Fortea, Lydia; Oliver, Dominic; Sanjuan, Julio	Precuneus and insular hypoactivation during cognitive processing in first-episode psychosis: Systematic review and meta-analysis of fMRI studies	REVISTA DE PSIQUIATRIA Y SALUD MENTAL	15	2	101	116		10.1016/j.rpsm.2020.08.001	2022	WOS:000840268100006
3	?	Zhang, Xiaoying; Qiu, Yidan; Li, Jinhui; Jia, Chuchu; Liao, Jiajun; Chen, Kemeng; Qiu, Lixin; Yuan, Zhen; Huang, Ruiwang	Neural correlates of transitive inference: An SDM meta-analysis on 32 fMRI studies	NEUROIMAGE	258				119354	10.1016/j.neuroimage.2022.119354	2022	WOS:000814754000006
1	?	Zheng, Lei; Miao, Miao; Gan, Yiqun	A systematic and meta-analytic review on the neural correlates of viewing high- and low-calorie foods among normal-weight adults	NEUROSCIENCE AND BIOBEHAVIORAL REVIEWS	138				104721	10.1016/j.neubiorev.2022.104721	2022	WOS:000816169400001
3	6.21	Ding, Yu-Dan; Chen, Xiao; Chen, Zuo-Bing; Li, Le; Li, Xue-Ying; Castellanos, Francisco Xavier; Bai, Tong-Jian; Bo, Qi-Jing; Cao, Jun; Chang, Zhi-Kai; Chen, Guan-Mao; Chen, Ning-Xuan; Chen, Wei; Cheng, Chang; Cheng, Yu-Qi; Cui, Xi-Long; Duan, Jia; Fang, Yi-Ru; Gong, Qi-Yong; Hou, Zheng-Hua; Hu, Lan; Kuang, Li; Li, Feng; Li, Hui-Xian; Li, Kai-Ming; Li, Tao; Liu, Yan-Song; Liu, Zhe-Ning; Long, Yi-Ch…	Reduced nucleus accumbens functional connectivity in reward network and default mode network in patients with recurrent major depressive disorder	TRANSLATIONAL PSYCHIATRY	12	1			236	10.1038/s41398-022-01995-x	2022	WOS:000806782600004
1	2.3.6	Peng, Shaoling; Xu, Pengfei; Jiang, Yaya; Gong, Gaolang	Activation network mapping for integration of heterogeneous fMRI findings	NATURE HUMAN BEHAVIOUR	6	10	1417	+		10.1038/s41562-022-01371-1	2022	WOS:000805100600005
9	?	Daigle, Katrina M.; Pietrzykowski, Malvina O.; Waters, Abigail B.; Swenson, Lance P.; Gansler, David A.	Central Executive Network and Executive Function in Patients With Alzheimer's Disease and Healthy Individuals: Meta-Analysis of Structural and Functional MRI	JOURNAL OF NEUROPSYCHIATRY AND CLINICAL NEUROSCIENCES	34	3	204	213		10.1176/appi.neuropsych.20110279	2022	WOS:000858801700003
1	3.0.2	Liu, Yuluo; Wang, Xiangyu; Gui, Shan; Tong, Fang; Liu, Zilong; Yang, Lian; Zhou, Yiwu	The Common and Different Neural Bases of Distraction and Reinterpretation: A Meta-Analysis of fMRI Studies	JOURNAL OF INTEGRATIVE NEUROSCIENCE	21	4			107	10.31083/j.jin2104107	2022	WOS:000834357700006
1	3.0.2	Jiao, Lu; Meng, Na; Wang, Zhen; Schwieter, John W.; Liu, Cong	Partially shared neural mechanisms of language control and executive control in bilinguals: Meta-analytic comparisons of language and task switching studies	NEUROPSYCHOLOGIA	172				108273	10.1016/j.neuropsychologia.2022.108273	2022	WOS:000833596500005
1	3.0.2	Martinez-Saito, Mario; Gorina, Elena	Learning under social versus nonsocial uncertainty: A meta-analytic approach	HUMAN BRAIN MAPPING	43	13	4185	4206		10.1002/hbm.25948	2022	WOS:000800465300001
10	?	Antal, Botond; McMahon, Liam P.; Sultan, Syed Fahad; Lithen, Andrew; Wexler, Deborah J.; Dickerson, Bradford; Ratai, Eva-Maria; Mujica-Parodi, Lilianne R.	Type 2 diabetes mellitus accelerates brain aging and cognitive decline: Complementary findings from UK Biobank and meta-analyses; Type 2 diabetes mellitus accelerates brain aging and cognitive decline: complementary findings from UK Biobank and meta-analyses.	ELIFE; ELIFE	11				e73138	10.7554/eLife.73138	2022	WOS:000804452700001
1	3.0.2	Wong, Nichol M. L.; Mabel-Kenzie, Sammi T. S. T.; Lin, Chemin; Huang, Chih-Mao; Liu, Ho-Ling; Lee, Shwu-Hua; Lee, Tatia M. C.	Meta-analytic evidence for the cognitive control model of loneliness in emotion processing	NEUROSCIENCE AND BIOBEHAVIORAL REVIEWS	138				104686	10.1016/j.neubiorev.2022.104686	2022	WOS:000816169400004
2	?	Xie, Yapei; Xu, Zhilei; Xia, Mingrui; Liu, Jin; Shou, Xiaojing; Cui, Zaixu; Liao, Xuhong; He, Yong	Alterations in Connectome Dynamics in Autism Spectrum Disorder: A Harmonized Mega- and Meta-analysis Study Using the Autism Brain Imaging Data Exchange Dataset; Alterations in connectome dynamics in autism spectrum disorder: A harmonized mega- and meta-analysis study using the ABIDE dataset	BIOLOGICAL PSYCHIATRY; BIOLOGICAL PSYCHIATRY	91	11	945	955		10.1016/j.biopsych.2021.12.004	2022	WOS:000830857200007
1,3	GingerALE: 3.0.2; SDM-PSI: ?	Yaple, Zachary Adam; Tolomeo, Serenella; Yu, Rongjun	Spatial and chronic differences in neural activity in medicated and unmedicated schizophrenia patients	NEUROIMAGE-CLINICAL	35				103029	10.1016/j.nicl.2022.103029	2022	WOS:000806595300003
2	?	Chang, Hyesang; Chen, Lang; Zhang, Yuan; Xie, Ye; de los Angeles, Carlo; Adair, Emma; Zanitti, Gaston; Wassermann, Demian; Rosenberg-Lee, Miriam; Menon, Vinod	Foundational Number Sense Training Gains Are Predicted by Hippocampal Parietal Circuits	JOURNAL OF NEUROSCIENCE	42	19	4000	4015		10.1523/JNEUROSCI.1005-21.2022	2022	WOS:000800567800002
3	?	Luna, Licia P.; Radua, Joaquim; Fortea, Lydia; Sugranyes, Gisela; Fortea, Adriana; Fusar-Poli, Paolo; Smith, Lee; Firth, Joseph; Shin, Jae Il; Brunoni, Andre R.; Husain, Muhammad I.; Husian, Muhammad O.; Sair, Haris I.; Mendes, Walber O.; Uchoa, Luiz Ricardo A.; Berk, Michael; Maes, Michael; Daskalakis, Zafiris J.; Frangou, Sophia; Fornaro, Michele; Vieta, Eduard; Stubbs, Brendon; Solmi, Marco; C…	A systematic review and meta-analysis of structural and functional brain alterations in individuals with genetic and clinical high-risk for psychosis and bipolar disorder	PROGRESS IN NEURO-PSYCHOPHARMACOLOGY & BIOLOGICAL PSYCHIATRY	117				110540	10.1016/j.pnpbp.2022.110540	2022	WOS:000805635900001
1	3.0.2	Zhang, Zhenyu; Huang, Pujiang; Li, Shuyu; Liu, Zhiyu; Zhang, Jiayao; Li, Ya'nan; Liu, Zhiyuan	Neural mechanisms underlying the processing of emotional stimuli in individuals with depression: An ALE meta-analysis study	PSYCHIATRY RESEARCH	313				114598	10.1016/j.psychres.2022.114598	2022	WOS:000804006800003
1	2.3.6	Shahab, Qazi S.; Young, Isabella M.; Dadario, Nicholas B.; Tanglay, Onur; Nicholas, Peter J.; Lin, Yueh-Hsin; Fonseka, R. Dineth; Yeung, Jacky T.; Bai, Michael Y.; Teo, Charles; Doyen, Stephane; Sughrue, Michael E.	A connectivity model of the anatomic substrates underlying Gerstmann syndrome	BRAIN COMMUNICATIONS	4	3			fcac140	10.1093/braincomms/fcac140	2022	WOS:000814338900003
1	3.0.2	Yeung, Andy Wai Kan	Differences in Brain Responses to Food or Tastants Delivered with and Without Swallowing: a Meta-analysis on Functional Magnetic Resonance Imaging (fMRI) Studies	CHEMOSENSORY PERCEPTION	15	2	112	123		10.1007/s12078-022-09299-6	2022	WOS:000788419700001
1	2.3.6	Wu, Huimin; Song, Yu; Chen, Shanshan; Ge, Honglin; Yan, Zheng; Qi, Wenzhang; Yuan, Qianqian; Liang, Xuhong; Lin, Xingjian; Chen, Jiu	An Activation Likelihood Estimation Meta-Analysis of Specific Functional Alterations in Dorsal Attention Network in Mild Cognitive Impairment	FRONTIERS IN NEUROSCIENCE	16				876568	10.3389/fnins.2022.876568	2022	WOS:000795683000001
1	3.0.2	Escobar-Magarino, Daniela; Turel, Ofir; He, Qinghua	Bilateral Intraparietal Activation for Number Tasks in Studies Using Adaptation Paradigm: A Meta-analysis	NEUROSCIENCE	490		296	308		10.1016/j.neuroscience.2022.02.024	2022	WOS:000797097400001
1	3.0.2	Morawetz, Carmen; Berboth, Stella; Kohn, Nils; Jackson, Philip L.; Jauniaux, Josiane	Reappraisal and empathic perspective-taking-More alike than meets the eyes	NEUROIMAGE	255				119194	10.1016/j.neuroimage.2022.119194	2022	WOS:000806408300006
1,3	GingerALE: 3.0.2; SDM-PSI: 6.21	Li, Xuqian; O'Sullivan, Michael J.; Mattingley, Jason B.	Delay activity during visual working memory: A meta-analysis of 30 fMRI experiments	NEUROIMAGE	255				119204	10.1016/j.neuroimage.2022.119204	2022	WOS:000806408300005
3	?	Peng, Wei; Hao, Qinghong; Gao, Heng; Wang, Yang; Wang, Jun; Tu, Yang; Yu, Siyi; Li, Hui; Zhu, Tianmin	Functional Neural Alterations in Pathological Internet Use: A Meta-Analysis of Neuroimaging Studies	FRONTIERS IN NEUROLOGY	13				841514	10.3389/fneur.2022.841514	2022	WOS:000809695600001
1	3.0.2	Du, Ying; He, Lingxiao; Wang, Yiyan; Liao, Dengbin	The Neural Mechanism of Long-Term Motor Training Affecting Athletes' Decision-Making Function: An Activation Likelihood Estimation Meta-Analysis	FRONTIERS IN HUMAN NEUROSCIENCE	16				854692	10.3389/fnhum.2022.854692	2022	WOS:000809694800001
1	3.0.2	Bulut, Talat	Neural correlates of morphological processing: An activation likelihood estimation meta-analysis	CORTEX	151		49	69		10.1016/j.cortex.2022.02.010	2022	WOS:000820985100004
1,3	GingerALE: 3.0.2; SDM-PSI: 5.15	Li, YiZhen; Bi, Hong-Yan	Comparative research on neural dysfunction in children with dyslexia under different writing systems: A meta-analysis study	NEUROSCIENCE AND BIOBEHAVIORAL REVIEWS	137				104650	10.1016/j.neubiorev.2022.104650	2022	WOS:000821893800017
1	2.3.6	Saward, Jacqueline B.; Ellis, Elizabeth G.; Cobden, Annalee L.; Caeyenberghs, Karen	Mapping cognitive deficits in cancer patients after chemotherapy: An Activation Likelihood Estimation meta-analysis of task-related fMRI studies	BRAIN IMAGING AND BEHAVIOR	16	5	2320	2334		10.1007/s11682-022-00655-4	2022	WOS:000777387600001
1	3.0.2	Vartanian, Oshin; Replete, Vladyslava; Saint, Sidney Ann; Lam, Quan; Forbes, Sarah; Beaudoin, Monique E.; Brunye, Tad T.; Bryant, David J.; Feltman, Kathryn A.; Heaton, Kristin J.; McKinley, Richard A.; Van Erp, Jan B. F.; Vergin, Annika; Whittaker, Annalise	What Is Targeted When We Train Working Memory? Evidence From a Meta-Analysis of the Neural Correlates of Working Memory Training Using Activation Likelihood Estimation	FRONTIERS IN PSYCHOLOGY	13				868001	10.3389/fpsyg.2022.868001	2022	WOS:000790528300001
1	3.0.2	de Voogd, Lycia D.; Hermans, Erno J.	Meta-analytic evidence for downregulation of the amygdala during working memory maintenance	HUMAN BRAIN MAPPING	43	9	2951	2971		10.1002/hbm.25828	2022	WOS:000774062300001
2	?	Xia, Mingrui; Liu, Jin; Mechelli, Andrea; Sun, Xiaoyi; Ma, Qing; Wang, Xiaoqin; Wei, Dongtao; Chen, Yuan; Liu, Bangshan; Huang, Chu-Chung; Zheng, Yanting; Wu, Yankun; Chen, Taolin; Cheng, Yuqi; Xu, Xiufeng; Gong, Qiyong; Si, Tianmei; Qiu, Shijun; Lin, Ching-Po; Cheng, Jingliang; Tang, Yanqing; Wang, Fei; Qiu, Jiang; Xie, Peng; Li, Lingjiang; He, Yong	Connectome gradient dysfunction in major depression and its association with gene expression profiles and treatment outcomes	MOLECULAR PSYCHIATRY	27	3	1384	1393		10.1038/s41380-022-01519-5	2022	WOS:000780350800004
3	6.12	Kasdan, Anna, V; Burgess, Andrea N.; Pizzagalli, Fabrizio; Scartozzi, Alyssa; Chern, Alexander; Kotz, Sonja A.; Wilson, Stephen M.; Gordon, Reyna L.	Identifying a brain network for musical rhythm: A functional neuroimaging meta-analysis and systematic review	NEUROSCIENCE AND BIOBEHAVIORAL REVIEWS	136				104588	10.1016/j.neubiorev.2022.104588	2022	WOS:000784176000003
3	?	Su, Dongning; Cui, Yusha; Liu, Zhu; Chen, Huimin; Fang, Jinping; Ma, Huizi; Zhou, Junhong; Feng, Tao	Altered Brain Activity in Depression of Parkinson's Disease: A Meta-Analysis and Validation Study	FRONTIERS IN AGING NEUROSCIENCE	14				806054	10.3389/fnagi.2022.806054	2022	WOS:000780365100001
1	2.3.6	Tan, Huixin; Duan, Qin; Liu, Yihan; Qiao, Xinyu; Luo, Siyang	Does losing money truly hurt? The shared neural bases of monetary loss and pain	HUMAN BRAIN MAPPING	43	10	3153	3163		10.1002/hbm.25840	2022	WOS:000771573800001
3	6.21	Zhang, Zheng; Peng, Peng	Reading Real Words Versus Pseudowords: A Meta-Analysis of Research in Developmental Dyslexia	DEVELOPMENTAL PSYCHOLOGY	58	6	1035	1050		10.1037/dev0001340	2022	WOS:000770422200001
1	3.0.2	Bronleigh, Madeline; Baumann, Oliver; Stapleton, Peta	Neural correlates associated with processing food stimuli in anorexia nervosa and bulimia nervosa: an activation likelihood estimation meta-analysis of fMRI studies	EATING AND WEIGHT DISORDERS-STUDIES ON ANOREXIA BULIMIA AND OBESITY	27	7	2309	2320		10.1007/s40519-022-01390-x	2022	WOS:000770498900001
3	5.15	Liu, Jing; Cao, Lingxiao; Li, Hailong; Gao, Yingxue; Bu, Xuan; Liang, Kaili; Bao, Weijie; Zhang, Suming; Qiu, Hui; Li, Xue; Hu, Xinyue; Lu, Lu; Zhang, Lianqing; Hu, Xinyu; Huang, Xiaoqi; Gong, Qiyong	Abnormal resting-state functional connectivity in patients with obsessive-compulsive disorder: A systematic review and meta-analysis	NEUROSCIENCE AND BIOBEHAVIORAL REVIEWS	135				104574	10.1016/j.neubiorev.2022.104574	2022	WOS:000762481700016
1	3.0.2	Chen, Wenjia; Li, Hui; Hou, Xiaoyan; Jia, Xize	Gray matter alteration in medication overuse headache: a coordinates-based activation likelihood estimation meta-analysis	BRAIN IMAGING AND BEHAVIOR	16	5	2307	2319		10.1007/s11682-022-00634-9	2022	WOS:000753760800001
3	6.21	Pico-Perez, Maria; Vieira, Rita; Fernandez-Rodriguez, Marcos; Pereira De Barros, Maria Antonia; Radua, Joaquim; Morgado, Pedro	Multimodal meta-analysis of structural gray matter, neurocognitive and social cognitive fMRI findings in schizophrenia patients	PSYCHOLOGICAL MEDICINE	52	4	614	624	PII S0033291721005523	10.1017/S0033291721005523	2022	WOS:000752113300001
1	3.0.2	Gan, Xianyang; Zhou, Xinqi; Li, Jialin; Jiao, Guojuan; Jiang, Xi; Biswal, Bharat; Yao, Shuxia; Klugah-Brown, Benjamin; Becker, Benjamin	Common and distinct neurofunctional representations of core and social disgust in the brain: Coordinate-based and network meta-analyses	NEUROSCIENCE AND BIOBEHAVIORAL REVIEWS; NEUROSCIENCE AND BIOBEHAVIORAL REVIEWS	135				104553	10.1016/j.neubiorev.2022.104553	2022	WOS:000763023000006
8	5.2	Boscato, Noeli; Exposto, Fernando; Nascimento, Gustavo G.; Svensson, Peter; Costa, Yuri M.	Is bruxism associated with changes in neural pathways? A systematic review and meta-analysis of clinical studies using neurophysiological techniques	BRAIN IMAGING AND BEHAVIOR	16	5	2268	2280		10.1007/s11682-021-00601-w	2022	WOS:000749062900001
3	?	Chen, Linglong; Rao, Bo; Li, Sirui; Gao, Lei; Xie, Yu; Dai, Xuan; Fu, Kai; Peng, Xu Zhi; Xu, Haibo	Altered Effective Connectivity Measured by Resting-State Functional Magnetic Resonance Imaging in Posterior Parietal-Frontal-Striatum Circuit in Patients With Disorder of Consciousness	FRONTIERS IN NEUROSCIENCE	15				766633	10.3389/fnins.2021.766633	2022	WOS:000753732800001
1	2.3.6	Zapparoli, Laura; Mariano, Marika; Paulesu, Eraldo	How the motor system copes with aging: a quantitative meta-analysis of the effect of aging on motor function control	COMMUNICATIONS BIOLOGY	5	1			79	10.1038/s42003-022-03027-2	2022	WOS:000745114000012
4	?	Brandl, Felix; Weise, Benedikt; Bratec, Satja Mulej; Jassim, Nazia; Ayala, Daniel Hoffmann; Bertram, Teresa; Ploner, Markus; Sorg, Christian	Common and specific large-scale brain changes in major depressive disorder, anxiety disorders, and chronic pain: a transdiagnostic multimodal meta-analysis of structural and functional MRI studies	NEUROPSYCHOPHARMACOLOGY	47	5	1071	1080		10.1038/s41386-022-01271-y	2022	WOS:000744788700001
3	?	Saldarini, Francesco; Gottlieb, Natalie; Stokes, Paul R. A.	Neural correlates of working memory function in euthymic people with bipolar disorder compared to healthy controls: A systematic review and meta-analysis	JOURNAL OF AFFECTIVE DISORDERS	297		610	622		10.1016/j.jad.2021.10.084	2022	WOS:000820162700020
4	?	Corlett, Philip R.; Mollick, Jessica A.; Kober, Hedy	Meta-analysis of human prediction error for incentives, perception, cognition, and action	NEUROPSYCHOPHARMACOLOGY	47	7	1339	1349		10.1038/s41386-021-01264-3	2022	WOS:000741247200002
1	2.3.6	Ji, Shanling; Zhang, Yinghui; Chen, Nan; Liu, Xia; Li, Yongchao; Shao, Xuexiao; Yang, Zhengwu; Yao, Zhijun; Hu, Bin	Shared increased entropy of brain signals across patients with different mental illnesses: A coordinate-based activation likelihood estimation meta-analysis	BRAIN IMAGING AND BEHAVIOR	16	1	336	343		10.1007/s11682-021-00507-7	2022	WOS:000740144500002
1	?	Cargnelutti, Elisa; Tomasino, Barbara; Fabbro, Franco	Effects of Linguistic Distance on Second Language Brain Activations in Bilinguals: An Exploratory Coordinate-Based Meta-Analysis	FRONTIERS IN HUMAN NEUROSCIENCE	15				744489	10.3389/fnhum.2021.744489	2022	WOS:000748433600001
1	3.0.2	Farshchi, M.	NEURAL SUBSTRATES THAT MAINTAIN PERCEIVING 3D INFORMATION: AN ALE META-ANALYSIS STUDY	PSYCHOLOGY-JOURNAL OF THE HIGHER SCHOOL OF ECONOMICS	19	4	663	683		10.17323/1813-8918-2022-4-663-683	2022	WOS:000915943900001
18	?	Uhre, Valdemar Funch; Larsen, Kit Melissa; Herz, Damian Marc; Baare, William; Pagsberg, Anne Katrine; Siebner, Hartwig Roman	Inhibitory control in obsessive compulsive disorder: A systematic review and activation likelihood estimation <i>meta</i>-analysis of functional magnetic resonance imaging studies	NEUROIMAGE-CLINICAL	36				103268	10.1016/j.nicl.2022.103268	2022	WOS:000892218700008
1	3.0.2	Ponticorvo, Sara; Prinster, Anna; Cantone, Elena; Di Salle, Francesco; Esposito, Fabrizio; Canna, Antonietta	Sex differences in the taste-evoked functional connectivity network	CHEMICAL SENSES	47				bjac015	10.1093/chemse/bjac015	2022	WOS:000815539200001
1	2.3.6	Del Maschio, Nicola; Fedeli, Davide; Garofalo, Gioacchino; Buccino, Giovanni	Evidence for the Concreteness of Abstract Language: A Meta-Analysis of Neuroimaging Studies	BRAIN SCIENCES	12	1			32	10.3390/brainsci12010032	2022	WOS:000747071300001
3	?	Jiang, Sisi; Li, Hechun; Liu, Linli; Yao, Dezhong; Luo, Cheng	Voxel-wise Functional Connectivity of the Default Mode Network in Epilepsies: A Systematic Review and Meta-Analysis	CURRENT NEUROPHARMACOLOGY	20	1	254	266		10.2174/1570159X19666210325130624	2022	WOS:000754266900007
3	?	Perdue, Meaghan, V; Mahaffy, Kelly; Vlahcevic, Katherine; Wolfman, Emma; Erbeli, Florina; Richlan, Fabio; Landi, Nicole	Reading intervention and neuroplasticity: A systematic review and meta-analysis of brain changes associated with reading intervention	NEUROSCIENCE AND BIOBEHAVIORAL REVIEWS	132		465	494		10.1016/j.neubiorev.2021.11.011	2022	WOS:000761982300017
1	3.0.2	Qiu, Yidan; Fan, Zhiling; Miao Zhong; Yang, Jinlong; Kun Wu; Hu Huiqing; Zhang, Ruibin; Yu Guo; Lee, Tatia M. C.; Huang, Ruiwang	Brain activation elicited by acute stress: An ALE meta-analysis	NEUROSCIENCE AND BIOBEHAVIORAL REVIEWS	132		706	724		10.1016/j.neubiorev.2021.11.020	2022	WOS:000762014700014
1	3.0.2	Yu, Jianping; Zhou, Ping; Yuan, Shiting; Wu, Yun; Wang, Chun; Zhang, Ning; Li, Chiang-Shan R.; Liu, Na	Symptom provocation in obsessive-compulsive disorder: A voxel-based meta-analysis and meta-analytic connectivity modeling	JOURNAL OF PSYCHIATRIC RESEARCH	146		125	134		10.1016/j.jpsychires.2021.12.029	2022	WOS:000743089800003
1	2.3	Burke, Matthew J.; Romanella, Sara M.; Mencarelli, Lucia; Greben, Rachel; Fox, Michael D.; Kaptchuk, Ted J.; Pascual-Leone, Alvaro; Santarnecchi, Emiliano	Placebo effects and neuromodulation for depression: a meta-analysis and evaluation of shared mechanisms	MOLECULAR PSYCHIATRY	27	3	1658	1666		10.1038/s41380-021-01397-3	2022	WOS:000729639900001
1	3.0.2	Zhao, Dongfang; Ding, Rui; Zhang, Huijuan; Zhang, Nan; Hu, Li; Luo, Wenbo	Individualized Prediction of Females' Empathic Concern from Intrinsic Brain Activity within General Network of State Empathy	COGNITIVE AFFECTIVE & BEHAVIORAL NEUROSCIENCE	22	2	403	413		10.3758/s13415-021-00964-z	2022	WOS:000715666800001
1,16	GingerALE: 3.0.2; NeuRoi: ?	Ferraro, Stefania; Klugah-Brown, Benjamin; Tench, Christopher R.; Yao, Shuxia; Nigri, Anna; Demichelis, Greta; Pinardi, Chiara; Bruzzone, Maria Grazia; Becker, Benjamin	Dysregulated anterior insula reactivity as robust functional biomarker for chronic pain-Meta-analytic evidence from neuroimaging studies; Dysregulated anterior insula reactivity as robust functional biomarker for chronic pain: convergent evidence from neuroimaging meta-analyses	HUMAN BRAIN MAPPING; HUMAN BRAIN MAPPING	43	3	998	1010		10.1002/hbm.25702	2022	WOS:000714253300001
3	?	Chan, Melody M. Y.; Han, Yvonne M. Y.	The Functional Brain Networks Activated by Music Listening: A Neuroimaging Meta-Analysis and Implications for Treatment	NEUROPSYCHOLOGY	36	1	4	22		10.1037/neu0000777	2022	WOS:000733111400001
3	5.15	Wang, Qianqian; Wang, Chunjie; Deng, Qiuyue; Zhan, Linlin; Tang, Yingying; Li, Huayun; Antwi, Collins Opoku; Xiang, Anfeng; Lv, Yating; Jia, Xize; Ren, Jun	Alterations of regional spontaneous brain activities in anxiety disorders: A meta-analysis	JOURNAL OF AFFECTIVE DISORDERS	296		233	240		10.1016/j.jad.2021.09.062	2022	WOS:000729968500029
1	3	Zhen, Shanshan; Yaple, Zachary A.; Eickhoff, Simon B.; Yu, Rongjun	To learn or to gain: neural signatures of exploration in human decision-making	BRAIN STRUCTURE & FUNCTION	227	1	63	76		10.1007/s00429-021-02389-3	2022	WOS:000702603600003
1	2.3.6	van Dun, Kim; Brinkmann, Pia; Depestele, Siel; Verstraelen, Stefanie; Meesen, Raf	Cerebellar Activation During Simple and Complex Bimanual Coordination: an Activation Likelihood Estimation (ALE) Meta-analysis	CEREBELLUM	21	6	987	1013		10.1007/s12311-021-01261-8	2022	WOS:000702233800001
19	?	Devoto, F.; Carioti, D.; Danelli, L.; Berlingeri, M.	A meta-analysis of functional neuroimaging studies on developmental dyslexia across European orthographies: the ADOD model	LANGUAGE COGNITION AND NEUROSCIENCE	37	3	285	314		10.1080/23273798.2021.1970200	2022	WOS:000692911600001
3	5.15	Chen, Cheng-feng; Chen, Wang-ni; Zhang, Bin	Functional alterations of the suicidal brain: a coordinate-based meta-analysis of functional imaging studies	BRAIN IMAGING AND BEHAVIOR	16	1	291	304		10.1007/s11682-021-00503-x	2022	WOS:000681545000001
18	?	Saberi, Amin; Mohammadi, Esmaeil; Zarei, Mojtaba; Eickhoff, Simon B.; Tahmasian, Masoud	Structural and functional neuroimaging of late-life depression: a coordinate-based meta-analysis	BRAIN IMAGING AND BEHAVIOR	16	1	518	531		10.1007/s11682-021-00494-9	2022	WOS:000679777400001
3	5.141	Rhoads, Shawn A.; Cutler, Jo; Marsh, Abigail A.	A feature-based network analysis and fMRI meta-analysis reveal three distinct types of prosocial decisions	SOCIAL COGNITIVE AND AFFECTIVE NEUROSCIENCE; SOCIAL COGNITIVE AND AFFECTIVE NEUROSCIENCE	16	12	1214	1233		10.1093/scan/nsab079	2022	WOS:000743949700002
2	?	Eckstrand K.L.; Silk J.S.; Nance M.; Wallace M.L.; Buckley N.; Lindenmuth M.; Flores L.; Alarcón G.; Quevedo K.; Phillips M.L.; Lenniger C.J.; McLean Sammon M.; Brostowin A.; Ryan N.; Jones N.; Forbes E.E.	Medial Prefrontal Cortex Activity to Reward Outcome Moderates the Association Between Victimization Due to Sexual Orientation and Depression in Youth	Biological Psychiatry: Cognitive Neuroscience and Neuroimaging	7	12	1289	1297		10.1016/j.bpsc.2022.08.009	2022	2-s2.0-85143510264
3	?	Liloia D.; Crocetta A.; Cauda F.; Duca S.; Costa T.; Manuello J.	Seeking Overlapping Neuroanatomical Alterations between Dyslexia and Attention-Deficit/Hyperactivity Disorder: A Meta-Analytic Replication Study	Brain Sciences	12	10			1367	10.3390/brainsci12101367	2022	2-s2.0-85140613964
99		Fouche J.-P.; Groenewold N.A.; Sevenoaks T.; Heany S.; Lochner C.; Alonso P.; Batistuzzo M.C.; Cardoner N.; Ching C.R.K.; de Wit S.J.; Gutman B.; Hoexter M.Q.; Jahanshad N.; Kim M.; Kwon J.S.; Mataix-Cols D.; Menchon J.M.; Miguel E.C.; Nakamae T.; Phillips M.L.; Pujol J.; Sakai Y.; Yun J.-Y.; Soriano-Mas C.; Thompson P.M.; Yamada K.; Veltman D.J.; van den Heuvel O.A.; Stein D.J.	Shape analysis of subcortical structures in obsessive-compulsive disorder and the relationship with comorbid anxiety, depression, and medication use: A meta-analysis by the OCD Brain Imaging Consortium	Brain and Behavior	12	10			e2755	10.1002/brb3.2755	2022	2-s2.0-85137930937
1	?	Li J.Y.; Wu H.; Yuan S.; Wang C.; Wang Q.; Zhong Y.; Zhang N.; Heffner K.; Fox P.T.	A meta-analysis on neural changes of cognitive training for mental disorders in executive function tasks: increase or decrease brain activation?	BMC Psychiatry	22	1			155	10.1186/s12888-022-03796-4	2022	2-s2.0-85125586486
1	3.0.2	Zheng C.J.; Van Drunen S.; Egorova-Brumley N.	Neural correlates of co-occurring pain and depression: an activation-likelihood estimation (ALE) meta-analysis and systematic review	Translational Psychiatry	12	1			196	10.1038/s41398-022-01949-3	2022	2-s2.0-85129782257
1	3.0.2	Gu L.; Shu H.; Wang Y.; Xu H.	Exploring brain changes of impulse control disorders in Parkinson's disease: An ALE study	Frontiers in Aging Neuroscience	14				966525	10.3389/fnagi.2022.966525	2022	2-s2.0-85138270838
2	?	Hunt C.A.; Letzen J.E.; Krimmel S.R.; Burrowes S.A.B.; Haythornthwaite J.A.; Finan P.H.; Vetter M.; Seminowicz D.A.	Is Mindfulness Associated With Lower Pain Reactivity and Connectivity of the Default Mode Network? A Replication and Extension Study in Healthy and Episodic Migraine Participants	Journal of Pain	23	12	2110	2120		10.1016/j.jpain.2022.07.011	2022	2-s2.0-85137400212
1	3.0.2	Zhang Z.	Functionally similar yet distinct neural mechanisms underlie different choice behaviors: ALE meta-analyses of decision-making under risk in adolescents and adults	Developmental Review	66				101052	10.1016/j.dr.2022.101052	2022	2-s2.0-85141306293
5	0.0.3	Hill-Bowen L.D.; Riedel M.C.; Salo T.; Flannery J.S.; Poudel R.; Laird A.R.; Sutherland M.T.	Convergent gray matter alterations across drugs of abuse and network-level implications: A meta-analysis of structural MRI studies	Drug and Alcohol Dependence	240				109625	10.1016/j.drugalcdep.2022.109625	2022	2-s2.0-85138080199
3	?	Zhang M.; Huang X.; Li B.; Shang H.; Yang J.	Gray Matter Structural and Functional Alterations in Idiopathic Blepharospasm: A Multimodal Meta-Analysis of VBM and Functional Neuroimaging Studies	Frontiers in Neurology	13				889714	10.3389/fneur.2022.889714	2022	2-s2.0-85133385481
3	5.15	Su C.; Liu W.; Wang Q.; Qiu S.; Li M.; Lv Y.; Yu Y.; Jia X.; Li H.	Abnormal resting-state local spontaneous functional activity in irritable bowel syndrome patients: A meta-analysis	Journal of Affective Disorders	302		177	184		10.1016/j.jad.2022.01.075	2022	2-s2.0-85123676201
3	5.15	Qi Z.; Wang J.; Gong J.; Su T.; Fu S.; Huang L.; Wang Y.	Common and specific patterns of functional and structural brain alterations in schizophrenia and bipolar disorder: A multimodal voxel-based meta-analysis	Journal of Psychiatry and Neuroscience	47	1	E32	E47		10.1503/jpn.210111	2022	2-s2.0-85123973295
3	6.21	Weng Y.; Lin J.; Ahorsu D.K.; Tsang H.W.H.	Neuropathways of theory of mind in schizophrenia: A systematic review and meta-analysis	Neuroscience and Biobehavioral Reviews	137				104625	10.1016/j.neubiorev.2022.104625	2022	2-s2.0-85128190702
3	6.21	Tang S.; Wang Y.; Liu Y.; Chau S.W.; Chan J.W.; Chu W.C.; Abrigo J.M.; Mok V.C.; Wing Y.K.	Large-scale network dysfunction in α-Synucleinopathy: A meta-analysis of resting-state functional connectivity	eBioMedicine	77				103915	10.1016/j.ebiom.2022.103915	2022	2-s2.0-85125673313
1	3.0.2	Pollok T.M.; Kaiser A.; Kraaijenvanger E.J.; Monninger M.; Brandeis D.; Banaschewski T.; Eickhoff S.B.; Holz N.E.	Neurostructural traces of early life adversities: A meta-analysis exploring age- and adversity-specific effects	Neuroscience and Biobehavioral Reviews	135				104589	10.1016/j.neubiorev.2022.104589	2022	2-s2.0-85125483215
2	?	Palmucci M.; Tagliazucchi E.	Divergences Between Resting State Networks and Meta-Analytic Maps Of Task-Evoked Brain Activity	Open Neuroimaging Journal	15	1			e187444002206270	10.2174/18744400-v15-e2206270	2022	2-s2.0-85137070779
99		Kamalian A.; Khodadadifar T.; Saberi A.; Masoudi M.; Camilleri J.A.; Eickhoff C.R.; Zarei M.; Pasquini L.; Laird A.R.; Fox P.T.; Eickhoff S.B.; Tahmasian M.	Convergent regional brain abnormalities in behavioral variant frontotemporal dementia: A neuroimaging meta-analysis of 73 studies	Alzheimer's and Dementia: Diagnosis, Assessment and Disease Monitoring	14	1			e12318	10.1002/dad2.12318	2022	2-s2.0-85137033637
1	3.0.2	Asano R.; Lo V.; Brown S.	The Neural Basis of Tonal Processing in Music: An ALE Meta-Analysis	Music and Science	5					10.1177/20592043221109958	2022	2-s2.0-85135253367
1	3.0.2	Dedry M.; Maryn Y.; Szmalec A.; Lith-Bijl J.V.; Dricot L.; Desuter G.	Neural Correlates of Healthy Sustained Vowel Phonation Tasks: A Systematic Review and Meta-Analysis of Neuroimaging Studies	Journal of Voice						10.1016/j.jvoice.2022.02.008	2022	2-s2.0-85128494091
1	3.0.2	Arioli M.; Cattaneo Z.; Rusconi M.L.; Blandini F.; Tettamanti M.	Action and emotion perception in Parkinson's disease: A neuroimaging meta-analysis	NeuroImage: Clinical	35				103031	10.1016/j.nicl.2022.103031	2022	2-s2.0-85130227810
1	3.0.2	Ma W.-Y.; Tian M.-J.; Yao Q.; Li Q.; Tang F.-Y.; Xiao C.-Y.; Shi J.-P.; Chen J.	Neuroimaging alterations in dementia with Lewy bodies and neuroimaging differences between dementia with Lewy bodies and Alzheimer's disease: An activation likelihood estimation meta-analysis	CNS Neuroscience and Therapeutics	28	2	183	205		10.1111/cns.13775	2022	2-s2.0-85121377065
3	6.21	Garces, Maria Sol; Alustiza, Irene; Albajes-Eizagirre, Anton; Goena, Javier; Molero, Patricio; Radua, Joaquim; Ortuno, Felipe	An fMRI Study Using a Combined Task of Interval Discrimination and Oddball Could Reveal Common Brain Circuits of Cognitive Change	FRONTIERS IN PSYCHIATRY	12				786113	10.3389/fpsyt.2021.786113	2021	WOS:000738858400001
2	?	Xu, Shan; Kong, Xiangzhen; Liu, Jia	Expression of CRY2 Gene in the Brain Is Related to Human Navigation	FRONTIERS IN RADIOLOGY	1				731070	10.3389/fradi.2021.731070	2021	WOS:001215561400001
2	?	Ning, Yanzhe; Zheng, Sisi; Feng, Sitong; Zhang, Binlong; Jia, Hongxiao	Potential Locations for Non-Invasive Brain Stimulation in Treating Schizophrenia: A Resting-State Functional Connectivity Analysis	FRONTIERS IN NEUROLOGY	12				766736	10.3389/fneur.2021.766736	2021	WOS:000738747200001
1	3.0.2	Yang, Yingkai; Wu, Qian; Morys, Filip	Brain Responses to High-Calorie Visual Food Cues in Individuals with Normal-Weight or Obesity: An Activation Likelihood Estimation Meta-Analysis	BRAIN SCIENCES	11	12			1587	10.3390/brainsci11121587	2021	WOS:000736158700001
18	?	Wong, Ting Yat; Zhang, Han; White, Tonya; Xu, Liyuan; Qiu, Anqi	Common functional brain networks between attention deficit and disruptive behaviors in youth	NEUROIMAGE	245				118732	10.1016/j.neuroimage.2021.118732	2021	WOS:000736962700009
1	3.0.2	Li, Jingjing; Liu, Zheng; Du, Zhongquan; Zhu, Ningning; Qiu, Xueqing; Xu, Xia	Cortical Activation During Finger Tapping Task Performance in Parkinson's Disease Is Influenced by Priming Conditions: An ALE Meta-Analysis	FRONTIERS IN HUMAN NEUROSCIENCE	15				774656	10.3389/fnhum.2021.774656	2021	WOS:000729970100001
1	3.0.2	Nilsson, Martin; Kalckert, Andreas	Region-of-interest analysis approaches in neuroimaging studies of body ownership: An activation likelihood estimation meta-analysis	EUROPEAN JOURNAL OF NEUROSCIENCE	54	11	7974	7988		10.1111/ejn.15534	2021	WOS:000722367500001
3	6.21	Lopez-Gamundi, Paula; Yao, Yuan-Wei; Chong, Trevor T-J.; Heekeren, Hauke R.; Mas-Herrero, Ernest; Marco-Pallar, Josep	The neural basis of effort valuation: A meta-analysis of functional magnetic resonance imaging studies	NEUROSCIENCE AND BIOBEHAVIORAL REVIEWS; NEUROSCIENCE AND BIOBEHAVIORAL REVIEWS	131		1275	1287		10.1016/j.neubiorev.2021.10.024	2021	WOS:000719235200005
3	6.21	Saarinen, Aino; Jaaskelainen, Iiro P.; Harjunen, Ville; Keltikangas-Jarvinen, Liisa; Jasinskaja-Lahti, Inga; Ravaja, Niklas	Neural basis of in-group bias and prejudices: A systematic meta-analysis	NEUROSCIENCE AND BIOBEHAVIORAL REVIEWS	131		1214	1227		10.1016/j.neubiorev.2021.10.027	2021	WOS:000719235200001
1	3.0.2	Boukrina, Olga; Chen, Peii	Neural Mechanisms of Prism Adaptation in Healthy Adults and Individuals with Spatial Neglect after Unilateral Stroke: A Review of fMRI Studies	BRAIN SCIENCES	11	11			1468	10.3390/brainsci11111468	2021	WOS:000727421600001
3	5.15	Bao, Weijie; Gao, Yingxue; Cao, Lingxiao; Li, Hailong; Liu, Jing; Liang, Kaili; Hu, Xinyue; Zhang, Lianqing; Hu, Xinyu; Gong, Qiyong; Huang, Xiaoqi	Alterations in large-scale functional networks in adult posttraumatic stress disorder: A systematic review and meta-analysis of resting-state functional connectivity studies	NEUROSCIENCE AND BIOBEHAVIORAL REVIEWS	131		1027	1036		10.1016/j.neubiorev.2021.10.017	2021	WOS:000715066900002
1	3.0.2	LaCroix, Arianna N.; James, Eltonnelle; Rogalsky, Corianne	Neural Resources Supporting Language Production vs. Comprehension in Chronic Post-stroke Aphasia: A Meta-Analysis Using Activation Likelihood Estimates	FRONTIERS IN HUMAN NEUROSCIENCE	15				680933	10.3389/fnhum.2021.680933	2021	WOS:000717102500001
18	?	Wu, Yan; Veerareddy, Apoorva; Lee, Mary R.; Bellucci, Gabriele; Camilleri, Julia A.; Eickhoff, Simon B.; Krueger, Frank	Understanding identification-based trust in the light of affiliative bonding: Meta-analytic neuroimaging evidence	NEUROSCIENCE AND BIOBEHAVIORAL REVIEWS	131		627	641		10.1016/j.neubiorev.2021.09.053	2021	WOS:000707474200006
7	?	Srirangarajan, Tara; Mortazavi, Leili; Bortolini, Tiago; Moll, Jorge; Knutson, Brian	Multi -band FMRI compromises detection of mesolimbic reward responses	NEUROIMAGE	244				118617	10.1016/j.neuroimage.2021.118617	2021	WOS:000709972900013
1	?	Yuan, Qianqian; Qi, Wenzhang; Xue, Chen; Ge, Honglin; Hu, Guanjie; Chen, Shanshan; Xu, Wenwen; Song, Yu; Zhang, XuLian; Xiao, Chaoyong; Chen, Jiu	Convergent Functional Changes of Default Mode Network in Mild Cognitive Impairment Using Activation Likelihood Estimation	FRONTIERS IN AGING NEUROSCIENCE	13				708687	10.3389/fnagi.2021.708687	2021	WOS:000710730800001
1	3.0.2	Spets, Dylan S.; Slotnick, Scott D.	Are there sex differences in brain activity during long-term memory? A systematic review and fMRI activation likelihood estimation meta-analysis	COGNITIVE NEUROSCIENCE	12	2024-04-03	163	173		10.1080/17588928.2020.1806810	2021	WOS:000703372000007
1	3.0.2	Castelhano, Joao; Lima, Gisela; Teixeira, Marta; Soares, Carla; Pais, Marta; Castelo-Branco, Miguel	The Effects of Tryptamine Psychedelics in the Brain: A meta-Analysis of Functional and Review of Molecular Imaging Studies	FRONTIERS IN PHARMACOLOGY	12				739053	10.3389/fphar.2021.739053	2021	WOS:000717219700001
1	3.0.2	Liu, Mingtong; Liu, Chang Hong; Zheng, Shuang; Zhao, Ke; Fu, Xiaolan	Reexamining the neural network involved in perception of facial expression: A meta-analysis	NEUROSCIENCE AND BIOBEHAVIORAL REVIEWS	131		179	191		10.1016/j.neubiorev.2021.09.024	2021	WOS:000709405300011
1	2.3.6	Xu, Wenwen; Song, Yu; Chen, Shanshan; Xue, Chen; Hu, Guanjie; Qi, Wenzhang; Ma, Wenying; Lin, Xingjian; Chen, Jiu	An ALE Meta-Analysis of Specific Functional MRI Studies on Subcortical Vascular Cognitive Impairment	FRONTIERS IN NEUROLOGY	12				649233	10.3389/fneur.2021.649233	2021	WOS:000703773400001
3	?	Qing, Xiuli; Gu, Li; Li, Dehua	Abnormalities of Localized Connectivity in Obsessive-Compulsive Disorder: A Voxel-Wise Meta-Analysis	FRONTIERS IN HUMAN NEUROSCIENCE	15				739175	10.3389/fnhum.2021.739175	2021	WOS:000754590200001
7	3.6.2	Mehta, Urvakhsh Meherwan; Ibrahim, Ferose Azeez; Sharma, Manu S.; Venkatasubramanian, Ganesan; Thirthalli, Jagadisha; Bharath, Rose Dawn; Bolo, Nicolas R.; Gangadhar, Bangalore N.; Keshavan, Matcheri S.	Resting-state functional connectivity predictors of treatment response in schizophrenia-A systematic review and meta-analysis	SCHIZOPHRENIA RESEARCH	237		153	165		10.1016/j.schres.2021.09.004	2021	WOS:000704336800022
7	3.6.2	Xu, Shu-xian; Deng, Wen-feng; Qu, Ying-ying; Lai, Wen-tao; Huang, Tan-yu; Rong, Han; Xie, Xin-hui	The integrated understanding of structural and functional connectomes in depression: A multimodal meta-analysis of graph metrics	JOURNAL OF AFFECTIVE DISORDERS	295		759	770		10.1016/j.jad.2021.08.120	2021	WOS:000730128900021
1	3.0.2	Bernstein, Lori J.; Edelstein, Kim; Sharma, Alisha; Alain, Claude	Chemo-brain: An activation likelihood estimation meta-analysis of functional magnetic resonance imaging studies	NEUROSCIENCE AND BIOBEHAVIORAL REVIEWS	130		314	325		10.1016/j.neubiorev.2021.08.024	2021	WOS:000709411900010
3	5.15	Wang, Xiuli; Cheng, Bochao; Roberts, Neil; Wang, Song; Luo, Ya; Tian, Fangfang; Yue, Suping	Shared and distinct brain fMRI response during performance of working memory tasks in adult patients with schizophrenia and major depressive disorder	HUMAN BRAIN MAPPING	42	16	5458	5476		10.1002/hbm.25618	2021	WOS:000688084700001
1	3.0.2	Pastrnak, Martin; Simkova, Eva; Novak, Tomas	Insula activity in resting-state differentiates bipolar from unipolar depression: a systematic review and meta-analysis	SCIENTIFIC REPORTS	11	1			16930	10.1038/s41598-021-96319-2	2021	WOS:000687326500056
1	3.0.2	Boccadoro, Sara; Wagels, Lisa; Puiu, Andrei A.; Votinov, Mikhail; Weidler, Carmen; Veselinovic, Tanja; Demko, Zachary; Raine, Adrian; Neuner, Irene	A meta-analysis on shared and distinct neural correlates of the decision-making underlying altruistic and retaliatory punishment	HUMAN BRAIN MAPPING	42	17	5547	5562		10.1002/hbm.25635	2021	WOS:000686574200001
2	?	Li, Lei; He, Changchun; Jian, Taorong; Guo, Xiaonan; Xiao, Jinming; Li, Ya; Chen, Heng; Kang, Xiaodong; Chen, Huafu; Duan, Xujun	Attenuated link between the medial prefrontal cortex and the amygdala in children with autism spectrum disorder: Evidence from effective connectivity within the "social brain"	PROGRESS IN NEURO-PSYCHOPHARMACOLOGY & BIOLOGICAL PSYCHIATRY	111				110147	10.1016/j.pnpbp.2020.110147	2021	WOS:000685636400011
1	3.0.2	Si, Ruoguang; Rowe, James B.; Zhang, Jiaxiang	Functional localization and categorization of intentional decisions in humans: A meta-analysis of brain imaging studies; Functional localization and categorization of intentional decisions in humans: a meta-analysis of brain imaging studies	NEUROIMAGE; NEUROIMAGE	242				118468	10.1016/j.neuroimage.2021.118468	2021	WOS:000693332400002
5	0.0.5	Isherwood, S. J. S.; Keuken, M. G.; Bazin, P. L.; Forstmann, B. U.	Cortical and subcortical contributions to interference resolution and inhibition - An fMRI ALE meta-analysis	NEUROSCIENCE AND BIOBEHAVIORAL REVIEWS	129		245	260		10.1016/j.neubiorev.2021.07.021	2021	WOS:000692239200001
3	?	Jauhar, S.; Fortea, L.; Solanes, A.; Albajes-Eizagirre, A.; McKenna, P. J.; Radua, J.	Brain activations associated with anticipation and delivery of monetary reward: A systematic review and meta-analysis of fMRI studies	PLOS ONE	16	8			e0255292	10.1371/journal.pone.0255292	2021	WOS:000685265700074
1	3.0.2	Tannou, Thomas; Magnin, Eloi; Comte, Alexandre; Aubry, Regis; Joubert, Sven	Neural Activation in Risky Decision-Making Tasks in Healthy Older Adults: A Meta-Analysis of fMRI Data	BRAIN SCIENCES	11	8			1043	10.3390/brainsci11081043	2021	WOS:000689001800001
1	?	Qiu, Xiaolei; Xu, Wenwen; Zhang, Rongrong; Yan, Wei; Ma, Wenying; Xie, Shiping; Zhou, Min	Regional Homogeneity Brain Alterations in Schizophrenia: An Activation Likelihood Estimation Meta-Analysis	PSYCHIATRY INVESTIGATION	18	8	709	+		10.30773/pi.2021.0062	2021	WOS:000691872800001
18	?	Heckner, Marisa K.; Cieslik, Edna C.; Eickhoff, Simon B.; Camilleri, Julia A.; Hoffstaedter, Felix; Langner, Robert	The Aging Brain and Executive Functions Revisited: Implications from Meta-analytic and Functional-Connectivity Evidence	JOURNAL OF COGNITIVE NEUROSCIENCE; JOURNAL OF COGNITIVE NEUROSCIENCE	33	9	1716	1752		10.1162/jocn_a_01616	2021	WOS:000684225300006
3,5	SDM-PSI: 6.21; NiMARE: 0.0.9	Enge, Alexander; Rahman, Rasha Abdel; Skeide, Michael A.	A meta-analysis of fMRI studies of semantic cognition in children	NEUROIMAGE	241				118436	10.1016/j.neuroimage.2021.118436	2021	WOS:000693400400004
3	6.21	Lukow, P. B.; Kiemes, A.; Kempton, M. J.; Turkheimer, F. E.; McGuire, P.; Modinos, G.	Neural correlates of emotional processing in psychosis risk and onset-A systematic review and meta-analysis of fMRI studies	NEUROSCIENCE AND BIOBEHAVIORAL REVIEWS	128		780	788		10.1016/j.neubiorev.2021.03.010	2021	WOS:000680162000004
1	2.3.6	Song, Yu; Xu, Wenwen; Chen, Shanshan; Hu, Guanjie; Ge, Honglin; Xue, Chen; Qi, Wenzhang; Lin, Xingjian; Chen, Jiu	Functional MRI-Specific Alterations in Salience Network in Mild Cognitive Impairment: An ALE Meta-Analysis	FRONTIERS IN AGING NEUROSCIENCE	13				695210	10.3389/fnagi.2021.695210	2021	WOS:000682897700001
3	6.21	Su, Ting; Gong, Jiaying; Tang, Guixian; Qiu, Shaojuan; Chen, Pan; Chen, Guanmao; Wang, Junjing; Huang, Li; Wang, Ying	Structural and functional brain alterations in anorexia nervosa:A multimodal meta-analysis of neuroimaging studies	HUMAN BRAIN MAPPING	42	15	5154	5169		10.1002/hbm.25602	2021	WOS:000676090800001
2	?	Goldin, Philippe R.; Thurston, Matthew; Allende, Santiago; Moodie, Craig; Dixon, Matthew L.; Heimberg, Richard G.; Gross, James J.	Evaluation of Cognitive Behavioral Therapy vs Mindfulness Meditation in Brain Changes During Reappraisal and Acceptance Among Patients With Social Anxiety Disorder A Randomized Clinical Trial	JAMA PSYCHIATRY	78	10	1134	1142		10.1001/jamapsychiatry.2021.1862	2021	WOS:000676017600002
2	?	Eslinger, Paul J.; Anders, Silke; Ballarini, Tommaso; Boutros, Sydney; Krach, Soren; Mayer, Annalina V.; Moll, Jorge; Newton, Tamara L.; Schroeter, Matthias L.; de Oliveira-Souza, Ricardo; Raber, Jacob; Sullivan, Gavin B.; Swain, James E.; Lowe, Leroy; Zahn, Roland	The neuroscience of social feelings: mechanisms of adaptive social functioning	NEUROSCIENCE AND BIOBEHAVIORAL REVIEWS	128		592	620		10.1016/j.neubiorev.2021.05.028	2021	WOS:000681166400001
1	2.3.6	Yaple, Zachary Adam; Tolomeo, Serenella; Yu, Rongjun	Mapping working memory-specific dysfunction using a transdiagnostic approach	NEUROIMAGE-CLINICAL	31				102747	10.1016/j.nicl.2021.102747	2021	WOS:000689552600011
3	?	Webler, Ryan D.; Berg, Hannah; Fhong, Kimberly; Tuominen, Lauri; Holt, Daphne J.; Morey, Rajendra A.; Lange, Iris; Burton, Philip C.; Fullana, Miquel Angel; Radua, Joaquim; Lissek, Shmuel	The neurobiology of human fear generalization: meta-analysis and working neural model	NEUROSCIENCE AND BIOBEHAVIORAL REVIEWS	128		421	436		10.1016/j.neubiorev.2021.06.035	2021	WOS:000681663100014
7	3.6.1	Saarinen, Aino; Keltikangas-Jarvinen, Liisa; Jaaskelainen, Erika; Huhtaniska, Sanna; Pudas, Juho; Tovar-Perdomo, Santiago; Penttila, Matti; Miettunen, Jouko; Lieslehto, Johannes	Early Adversity and Emotion Processing From Faces: A Meta-analysis on Behavioral and Neurophysiological Responses	BIOLOGICAL PSYCHIATRY-COGNITIVE NEUROSCIENCE AND NEUROIMAGING	6	7	692	705		10.1016/j.bpsc.2021.01.002	2021	WOS:000672808000006
1	3.0.2	Kim, Dongwon; Chae, Younbyoung; Park, Hi-Joon; Lee, In-Seon	Effects of Chronic Pain Treatment on Altered Functional and Metabolic Activities in the Brain: A Systematic Review and Meta-Analysis of Functional Neuroimaging Studies	FRONTIERS IN NEUROSCIENCE	15				684926	10.3389/fnins.2021.684926	2021	WOS:000674267000001
1	2.3.6	O'Neal, Christen M.; Ahsan, Syed A.; Dadario, Nicholas B.; Fonseka, R. Dineth; Young, Isabella M.; Parker, Allan; Maxwell, B. David; Yeung, Jacky T.; Briggs, Robert G.; Teo, Charles; Sughrue, Michael E.	A connectivity model of the anatomic substrates underlying ideomotor apraxia: A meta-analysis of functional neuroimaging studies	CLINICAL NEUROLOGY AND NEUROSURGERY	207				106765	10.1016/j.clineuro.2021.106765	2021	WOS:000715561900004
1	3.0.2	Yang Hui; Qin Qing; Jiang Jize; Xiang Hui; Yang Zhenggui; Zhou Yu; Wu Yong; Zhang Maolan	Explore functional brain changes in bipolar disorder: A whole brain ALE meta-analysis	ARCHIVES OF CLINICAL PSYCHIATRY	48	4	208	215		10.15761/0101-60830000000309	2021	WOS:000724860600005
3	5.15	Gao, Xinyu; Zhang, Mengzhe; Yang, Zhengui; Wen, Mengmeng; Huang, Huiyu; Zheng, Ruiping; Wang, Weijian; Wei, Yarui; Cheng, Jingliang; Han, Shaoqiang; Zhang, Yong	Structural and Functional Brain Abnormalities in Internet Gaming Disorder and Attention-Deficit/Hyperactivity Disorder: A Comparative Meta-Analysis	FRONTIERS IN PSYCHIATRY	12				679437	10.3389/fpsyt.2021.679437	2021	WOS:000673464100001
2	?	Peng, Xiaolong; Wu, Xiaoping; Gong, Ruxue; Yang, Rui; Wang, Xiang; Zhu, Wenzhen; Lin, Pan	Sub-regional anterior cingulate cortex functional connectivity revealed default network subsystem dysfunction in patients with major depressive disorder	PSYCHOLOGICAL MEDICINE	51	10	1687	1695	PII S0033291720000434	10.1017/S0033291720000434	2021	WOS:000680087700010
3	5.15	Zeng, Jianguang; Yu, Shuxian; Cao, Hengyi; Su, Yueyue; Dong, Zaiquan; Yang, Xun	Neurobiological correlates of cue-reactivity in alcohol-use disorders: A voxel-wise meta-analysis of fMRI studies	NEUROSCIENCE AND BIOBEHAVIORAL REVIEWS	128		294	310		10.1016/j.neubiorev.2021.06.031	2021	WOS:000681663100004
4,20	MKDA: ?; BMACS: ?	Shin, Minho; Jeon, Hyeon-Ae	A Cortical Surface-Based Meta-Analysis of Human Reasoning	CEREBRAL CORTEX	31	12	5497	5510		10.1093/cercor/bhab174	2021	WOS:000733367300016
3	5.12	Delgado-Herrera, Maribel; Reyes-Aguilar, Azalea; Giordano, Magda	What Deception Tasks Used in the Lab Really Do: Systematic Review and Meta-analysis of Ecological Validity of fMRI Deception Tasks	NEUROSCIENCE	468		88	109		10.1016/j.neuroscience.2021.06.005	2021	WOS:000677487600008
99		Janouschek, Hildegard; Chase, Henry W.; Sharkey, Rachel J.; Peterson, Zeru J.; Camilleri, Julia A.; Abel, Ted; Eickhoff, Simon B.; Nickl-Jockschat, Thomas	The functional neural architecture of dysfunctional reward processing in autism	NEUROIMAGE-CLINICAL	31				102700	10.1016/j.nicl.2021.102700	2021	WOS:000689516300001
1	3	Li, Jinhui; Zhang, Ruibin; Liu, Siqi; Liang, Qunjun; Zheng, Senning; He, Xianyou; Huang, Ruiwang	Human spatial navigation: Neural representations of spatial scales and reference frames obtained from an ALE meta-analysis	NEUROIMAGE	238				118264	10.1016/j.neuroimage.2021.118264	2021	WOS:000677954600008
3	6.21	Liu, Jieke; Li, Yong; Yang, Xi; Xu, Hao; Ren, Jing; Zhou, Peng	Regional Spontaneous Neural Activity Alterations in Type 2 Diabetes Mellitus: A Meta-Analysis of Resting-State Functional MRI Studies	FRONTIERS IN AGING NEUROSCIENCE	13				678359	10.3389/fnagi.2021.678359	2021	WOS:000668340700001
3	?	Del Fabro, Lorenzo; Schmidt, Andre; Fortea, Lydia; Delvecchio, Giuseppe; D'Agostino, Armando; Radua, Joaquim; Borgwardt, Stefan; Brambilla, Paolo	Functional brain network dysfunctions in subjects at high-risk for psychosis: A meta-analysis of resting-state functional connectivity	NEUROSCIENCE AND BIOBEHAVIORAL REVIEWS	128		90	101		10.1016/j.neubiorev.2021.06.020	2021	WOS:000735326300009
4	?	Gong, Jiaying; Wang, Junjing; Chen, Pan; Qi, Zhangzhang; Luo, Zhenye; Wang, Jurong; Huang, Li; Wang, Ying	Large-scale network abnormality in bipolar disorder: A multimodal meta-analysis of resting-state functional and structural magnetic resonance imaging studies	JOURNAL OF AFFECTIVE DISORDERS	292		9	20		10.1016/j.jad.2021.05.052	2021	WOS:000672805500002
2	?	Barnett, Alexander J.; Reilly, Walter; Dimsdale-Zucker, Halle R.; Mizrak, Eda; Reagh, Zachariah; Ranganath, Charan	Intrinsic connectivity reveals functionally distinct cortico-hippocampal networks in the human brain; Organization of cortico-hippocampal networks in the human brain	PLOS BIOLOGY; PLOS BIOLOGY	19	6			e3001275	10.1371/journal.pbio.3001275	2021	WOS:000664238400002
1	3.0.2	Yu, Xianglian; Ruan, Yijun; Zhang, Yawen; Wang, Jiayi; Liu, Yuting; Zhang, Jibiao; Zhang, Lin	Cognitive Neural Mechanism of Social Anxiety Disorder: A Meta-Analysis Based on fMRI Studies	INTERNATIONAL JOURNAL OF ENVIRONMENTAL RESEARCH AND PUBLIC HEALTH	18	11			5556	10.3390/ijerph18115556	2021	WOS:000659988900001
1	3.0.2	Dugre, Jules Roger; Potvin, Stephane	Impaired attentional and socio-affective networks in subjects with antisocial behaviors: a meta-analysis of resting-state functional connectivity studies	PSYCHOLOGICAL MEDICINE	51	8	1249	1259	PII S0033291721001525	10.1017/S0033291721001525	2021	WOS:000664673100002
1	3.0.2	Yeung, Andy Wai Kan	Brain responses to watching food commercials compared with nonfood commercials: a meta-analysis on neuroimaging studies	PUBLIC HEALTH NUTRITION	24	8	2153	2160	PII S1368980020003122	10.1017/S1368980020003122	2021	WOS:000653328500015
1	3.0.2	Degasperi, Giorgia; Cristea, Ioana Alina; Di Rosa, Elisa; Costa, Cristiano; Gentili, Claudio	Parsing variability in borderline personality disorder: a meta-analysis of neuroimaging studies	TRANSLATIONAL PSYCHIATRY	11	1			314	10.1038/s41398-021-01446-z	2021	WOS:000658515100005
8	5.3	Yao, Lin; Li, Mengyuan; Cao, Jiazhen; Liu, Yanze; Zheng, Haizhu; Huang, Haipeng; Wang, Hongfeng	Study on acupuncture improving insomnia comorbid with depression and anxiety based on rs-fMRI A protocol for systematic review and meta-analysis	MEDICINE	100	20			e25988	10.1097/MD.0000000000025988	2021	WOS:000658953300071
1	3.0.2	Heckner, Marisa K.; Cieslik, Edna C.; Kuppers, Vincent; Fox, Peter T.; Eickhoff, Simon B.; Langner, Robert	Delineating visual, auditory and motor regions in the human brain with functional neuroimaging: a BrainMap-based meta-analytic synthesis	SCIENTIFIC REPORTS	11	1			9942	10.1038/s41598-021-88773-9	2021	WOS:000658755000019
5	?	Witt, Suzanne T.; van Ettinger-Veenstra, Helene; Salo, Taylor; Riedel, Michael C.; Laird, Angela R.	What Executive Function Network is that? An Image-Based Meta-Analysis of Network Labels	BRAIN TOPOGRAPHY; BRAIN TOPOGRAPHY	34	5	598	607		10.1007/s10548-021-00847-z	2021	WOS:000648852000001
1	3.0.2	Derbie, Abiot Y.; Chau, Bolton K. H.; Wong, Clive H. Y.; Chen, Li-Dian; Ting, Kin-hung; Lam, Bess Y. H.; Lee, Tatia M. C.; Chan, Chetwyn C. H.	Common and distinct neural trends of allocentric and egocentric spatial coding: An ALE meta-analysis	EUROPEAN JOURNAL OF NEUROSCIENCE	53	11	3672	3687		10.1111/ejn.15240	2021	WOS:000648696000001
3	?	Yaple, Zachary Adam; Tolomeo, Serenella; Yu, Rongjun	Abnormal prediction error processing in schizophrenia and depression	HUMAN BRAIN MAPPING	42	11	3547	3560		10.1002/hbm.25453	2021	WOS:000647407900001
1	3.0.2	Martin-Luengo, Beatriz; Zinchenko, Oksana; Dolgoarshinnaia, Aleksandra; Leminen, Alina	Retrospective confidence judgments: Meta-analysis of functional magnetic resonance imaging studies	HUMAN BRAIN MAPPING	42	10	3005	3022		10.1002/hbm.25397	2021	WOS:000647207700001
3	6.21	Le, Thang M.; Potvin, Stephane; Zhornitsky, Simon; Li, Chiang-Shan R.	Distinct patterns of prefrontal cortical disengagement during inhibitory control in addiction: A meta-analysis based on population characteristics	NEUROSCIENCE AND BIOBEHAVIORAL REVIEWS	127		255	269		10.1016/j.neubiorev.2021.04.028	2021	WOS:000677478200014
1	2.3.6	Li, Hehui; Zhang, Jia; Ding, Guosheng	Reading across writing systems: A meta-analysis of the neural correlates for first and second language reading	BILINGUALISM-LANGUAGE AND COGNITION	24	3	537	548	PII S136672892000070X	10.1017/S136672892000070X	2021	WOS:000636755700010
1	3.0.2	Jassim, Nazia; Baron-Cohen, Simon; Suckling, John	Meta-analytic evidence of differential prefrontal and early sensory cortex activity during non-social sensory perception in autism	NEUROSCIENCE AND BIOBEHAVIORAL REVIEWS	127		146	157		10.1016/j.neubiorev.2021.04.014	2021	WOS:000677478200007
1	2.3.2	Santarnecchi, Emiliano; Momi, Davide; Mencarelli, Lucia; Plessow, Franziska; Saxena, Sadhvi; Rossi, Simone; Rossi, Alessandro; Mathan, Santosh; Pascual-Leone, Alvaro	Overlapping and dissociable brain activations for fluid intelligence and executive functions	COGNITIVE AFFECTIVE & BEHAVIORAL NEUROSCIENCE	21	2	327	346		10.3758/s13415-021-00870-4	2021	WOS:000644264500001
3	5.15	Yao, Li; Yang, Chengmin; Zhang, Wenjing; Li, Siyi; Li, Qian; Chen, Lizhou; Lui, Su; Kemp, Graham J.; Biswal, Bharat B.; Shah, Nadim J.; Li, Fei; Gong, Qiyong	A multimodal meta-analysis of regional structural and functional brain alterations in type 2 diabetes	FRONTIERS IN NEUROENDOCRINOLOGY	62				100915	10.1016/j.yfrne.2021.100915	2021	WOS:000701618700009
2	0.4	Suzuki, Keita; Yamashita, Okito	MEG current source reconstruction using a meta-analysis fMRI prior	NEUROIMAGE	236				118034	10.1016/j.neuroimage.2021.118034	2021	WOS:000668961100003
1	2.3.6	Vucurovic, Ksenija; Caillies, Stephanie; Kaladjian, Arthur	Neural Correlates of Mentalizing in Individuals With Clinical High Risk for Schizophrenia: ALE Meta-Analysis	FRONTIERS IN PSYCHIATRY	12				634015	10.3389/fpsyt.2021.634015	2021	WOS:000646602100001
2	?	Zhang, Zhaoqi; Yuan, Qiming; Liu, Zeping; Zhang, Man; Wu, Junjie; Lu, Chunming; Ding, Guosheng; Guo, Taomei	The cortical organization of writing sequence: evidence from observing Chinese characters in motion	BRAIN STRUCTURE & FUNCTION	226	5	1627	1639		10.1007/s00429-021-02276-x	2021	WOS:000640957900001
1	3.0.2	Kim, Hongkeun	Imaging recollection, familiarity, and novelty in the frontoparietal control and default mode networks and the anterior-posterior medial temporal lobe: An integrated view and meta-analysis	NEUROSCIENCE AND BIOBEHAVIORAL REVIEWS	126		491	508		10.1016/j.neubiorev.2021.04.007	2021	WOS:000656710800006
1	2.3.6	Huang, Kexin; Kang, Yafei; Wu, Zhongcheng; Wang, Yubo; Cai, Suping; Huang, Liyu	Asymmetrical alterations of grey matter among psychiatric disorders: A systematic analysis by voxel-based activation likelihood estimation	PROGRESS IN NEURO-PSYCHOPHARMACOLOGY & BIOLOGICAL PSYCHIATRY	110				110322	10.1016/j.pnpbp.2021.110322	2021	WOS:000670371100009
1	3.0.3	Farkas, Andrew H.; Trotti, Rebekah L.; Edge, Elizabeth A.; Huang, Ling-Yu; Kasowski, Aviva; Thomas, Olivia F.; Chlan, Eli; Granros, Maria P.; Patel, Kajol K.; Sabatinelli, Dean	Humor and emotion: Quantitative meta analyses of functional neuroimaging studies	CORTEX	139		60	72		10.1016/j.cortex.2021.02.023	2021	WOS:000651764500005
2,18	?	Feng, Chunliang; Eickhoff, Simon B.; Li, Ting; Wang, Li; Becker, Benjamin; Camilleri, Julia A.; Hetu, Sebastien; Luo, Yi	Common brain networks underlying human social interactions: Evidence from large-scale neuroimaging meta-analysis	NEUROSCIENCE AND BIOBEHAVIORAL REVIEWS	126		289	303		10.1016/j.neubiorev.2021.03.025	2021	WOS:000656249400007
1	3.0.2	Zhang, Zheng; Peng, Peng; Eickhoff, Simon B.; Lin, Xin; Zhang, Delong; Wang, Yingying	Neural substrates of the executive function construct, age-related changes, and task materials in adolescents and adults: ALE meta-analyses of 408 fMRI studies	DEVELOPMENTAL SCIENCE	24	6				10.1111/desc.13111	2021	WOS:000636595800001
2	?	Bystritsky, Alexander; Spivak, Norman M.; Dang, Bianca H.; Becerra, Sergio A.; Distler, Margaret G.; Jordan, Sheldon E.; Kuhn, Taylor P.	Brain circuitry underlying the ABC model of anxiety	JOURNAL OF PSYCHIATRIC RESEARCH	138		3	14		10.1016/j.jpsychires.2021.03.030	2021	WOS:000658539100002
2	?	Olaru, Maria; Nillo, Ryan M.; Mukherjee, Pratik; Sugrue, Leo P.	A quantitative approach for measuring laterality in clinical fMRI for preoperative language mapping	NEURORADIOLOGY	63	9	1489	1500		10.1007/s00234-021-02685-z	2021	WOS:000633351600001
3	?	Lan, Huan; Suo, Xueling; Li, Wenbin; Li, Nannan; Li, Junying; Peng, Jiaxin; Lei, Du; Sweeney, John A.; Kemp, Graham J.; Peng, Rong; Gong, Qiyong	Abnormalities of intrinsic brain activity in essential tremor: A meta-analysis of resting-state functional imaging	HUMAN BRAIN MAPPING	42	10	3156	3167		10.1002/hbm.25425	2021	WOS:000632926300001
1	3.0.2	Stefaniak, James D.; Alyahya, Reem S. W.; Ralph, Matthew A. Lambon	Language networks in aphasia and health: A 1000 participant activation likelihood estimation meta-analysis; Language networks in aphasia and health: a 1000 participant Activation Likelihood Estimate analysis	NEUROIMAGE; NEUROIMAGE	233				117960	10.1016/j.neuroimage.2021.117960	2021	WOS:000647590900005
6	?	Merritt, Carrington C.; MacCormack, Jennifer K.; Stein, Andrea G.; Lindquist, Kristen A.; Muscatell, Keely A.	The neural underpinnings of intergroup social cognition: an fMRI meta-analysis	SOCIAL COGNITIVE AND AFFECTIVE NEUROSCIENCE	16	9	903	914		10.1093/scan/nsab034	2021	WOS:000746178200001
1	3.0.2	Raimo, Simona; Santangelo, Gabriella; Trojano, Luigi	The Neural Bases of Drawing. A Meta-analysis and a Systematic Literature Review of Neurofunctional Studies in Healthy Individuals	NEUROPSYCHOLOGY REVIEW	31	4	689	702		10.1007/s11065-021-09494-4	2021	WOS:000629555200001
1	2.3.6	Costa, Cristiano; Cristea, Ioana Alina; Dal Bo, Elisa; Melloni, Caterina; Gentili, Claudio	Brain activity during facial processing in autism spectrum disorder: an activation likelihood estimation (ALE) meta-analysis of neuroimaging studies	JOURNAL OF CHILD PSYCHOLOGY AND PSYCHIATRY	62	12	1412	1424		10.1111/jcpp.13412	2021	WOS:000628986100001
1	3.0.2	Ashworth, Emma; Brooks, Samantha J.; Schioth, Helgi B.	Neural activation of anxiety and depression in children and young people: A systematic meta-analysis of fMRI studies	PSYCHIATRY RESEARCH-NEUROIMAGING	311				111272	10.1016/j.pscychresns.2021.111272	2021	WOS:000641360100001
3	?	Chan, Melody M. Y.; Yau, Sonata S. Y.; Han, Yvonne M. Y.	The neurobiology of prefrontal transcranial direct current stimulation (tDCS) in promoting brain plasticity: A systematic review and meta-analyses of human and rodent studies	NEUROSCIENCE AND BIOBEHAVIORAL REVIEWS	125		392	416		10.1016/j.neubiorev.2021.02.035	2021	WOS:000646733700014
3	5.15	Wang, Qing; Li, Hua-Yun; Li, Yun-Da; Lv, Ya-Ting; Ma, Hui-Bin; Xiang, An-Feng; Jia, Xi-Ze; Liu, Dong-Qiang	Resting-state abnormalities in functional connectivity of the default mode network in autism spectrum disorder: a meta-analysis	BRAIN IMAGING AND BEHAVIOR	15	5	2583	2592		10.1007/s11682-021-00460-5	2021	WOS:000626450200001
1	3.0.2	Yu, Qian; Herold, Fabian; Becker, Benjamin; Klugah-Brown, Ben; Zhang, Yanjie; Perrey, Stephane; Veronese, Nicola; Mueller, Notger G.; Kramer, Arthur F.; Zou, Liye	Cognitive benefits of exercise interventions: an fMRI activation likelihood estimation meta-analysis	BRAIN STRUCTURE & FUNCTION	226	3	601	619		10.1007/s00429-021-02247-2	2021	WOS:000625735800002
1	3.0.2	Spindler, Carolin; Trautmann, Sebastian; Alexander, Nina; Broening, Sonja; Bartscher, Sarah; Stuppe, Markus; Muehlhan, Markus	Meta-analysis of grey matter changes and their behavioral characterization in patients with alcohol use disorder	SCIENTIFIC REPORTS	11	1			5238	10.1038/s41598-021-84804-7	2021	WOS:000626140000066
18	2016b	Zunhammer, Matthias; Spisak, Tamas; Wager, Tor D.; Bingel, Ulrike	Meta-analysis of neural systems underlying placebo analgesia from individual participant fMRI data	NATURE COMMUNICATIONS	12	1			1391	10.1038/s41467-021-21179-3	2021	WOS:000626586700010
1	3.0.2	Ortiz-Teran, Elena; Diez, Ibai; Lopez-Pascual, Joaquin	An ALE Meta-Analysis on Investment Decision-Making	BRAIN SCIENCES	11	3			399	10.3390/brainsci11030399	2021	WOS:000633404900001
1	2.3.6	Meekings, Sophie; Scott, Sophie K.	Error in the Superior Temporal Gyrus? A Systematic Review and Activation Likelihood Estimation Meta-Analysis of Speech Production Studies	JOURNAL OF COGNITIVE NEUROSCIENCE	33	3	422	444		10.1162/jocn_a_01661	2021	WOS:000613461300006
3	?	Martins, D.; Rademacher, L.; Gabay, A. S.; Taylor, R.; Richey, J. A.; Smith, D., V; Goerlich, K. S.; Nawijn, L.; Cremers, H. R.; Wilson, R.; Bhattacharyya, S.; Paloyelis, Y.	Mapping social reward and punishment processing in the human brain: A voxel-based meta-analysis of neuroimaging findings using the social incentive delay task	NEUROSCIENCE AND BIOBEHAVIORAL REVIEWS	122		1	17		10.1016/j.neubiorev.2020.12.034	2021	WOS:000618527100001
2	?	Tavakol, Shahin; Li, Qiongling; Royer, Jessica; de Wael, Reinder Vos; Lariviere, Sara; Lowe, Alex; Paquola, Casey; Jefferies, Elizabeth; Hartley, Tom; Bernasconi, Andrea; Bernasconi, Neda; Smallwood, Jonathan; Bohbot, Veronique; Caciagli, Lorenzo; Bernhardt, Boris	A Structure-Function Substrate of Memory for Spatial Configurations in Medial and Lateral Temporal Cortices	CEREBRAL CORTEX	31	7	3213	3225		10.1093/cercor/bhab001	2021	WOS:000670805500005
3	5.1	Sun, Jia-Wei; Fan, Rui; Wang, Qing; Wang, Qian-Qian; Jia, Xi-Ze; Ma, Hui-Bin	Identify abnormal functional connectivity of resting state networks in Autism spectrum disorder and apply to machine learning-based classification	BRAIN RESEARCH	1757				147299	10.1016/j.brainres.2021.147299	2021	WOS:000620268900006
1	2.3	Tao, Di; He, Zonglin; Lin, Yuchen; Liu, Chang; Tao, Qian	Where does fear originate in the brain? A coordinate-based meta-analysis of explicit and implicit fear processing	NEUROIMAGE	227				117686	10.1016/j.neuroimage.2020.117686	2021	WOS:000617281900047
1	3.0.2	Mwilambwe-Tshilobo, Laetitia; Spreng, R. Nathan	Social exclusion reliably engages the default network: A meta-analysis of Cyberball	NEUROIMAGE	227				117666	10.1016/j.neuroimage.2020.117666	2021	WOS:000617281900035
3	6.21	Cao, Yuan; Wu, Baolin; Chen, Taolin; Diao, Wei; Jia, Zhiyun	Altered intrinsic brain activity in patients with hepatic encephalopathy	JOURNAL OF NEUROSCIENCE RESEARCH	99	5	1337	1353		10.1002/jnr.24788	2021	WOS:000617610100001
1	?	Berretz, Gesa; Packheiser, Julian; Kumsta, Robert; Wolf, Oliver T.; Ocklenburg, Sebastian	The brain under stress-A systematic review and activation likelihood estimation meta-analysis of changes in BOLD signal associated with acute stress exposure	NEUROSCIENCE AND BIOBEHAVIORAL REVIEWS	124		89	99		10.1016/j.neubiorev.2021.01.001	2021	WOS:000632006600006
1	3.0.2	Berboth, Stella; Morawetz, Carmen	Amygdala-prefrontal connectivity during emotion regulation: A meta-analysis of psychophysiological interactions	NEUROPSYCHOLOGIA	153				107767	10.1016/j.neuropsychologia.2021.107767	2021	WOS:000621714000002
3	5.15	Antonucci, Linda A.; Penzel, Nora; Pigoni, Alessandro; Dominke, Clara; Kambeitz, Joseph; Pergola, Giulio	Flexible and specific contributions of thalamic subdivisions to human cognition	NEUROSCIENCE AND BIOBEHAVIORAL REVIEWS	124		35	53		10.1016/j.neubiorev.2021.01.014	2021	WOS:000632006600003
1	2.3.6	Groenendijk, Ilse M.; Mehnert, Ulrich; Groen, Jan; Clarkson, Becky D.; Scheepe, Jeroen R.; Blok, Bertil F. M.	A systematic review and activation likelihood estimation meta-analysis of the central innervation of the lower urinary tract: Pelvic floor motor control and micturition	PLOS ONE	16	2			e0246042	10.1371/journal.pone.0246042	2021	WOS:000616739700058
3	5.15	Qiu, Zeguo; Wang, Junjing	Altered neural activities during response inhibition in adults with addiction: a voxel-wise meta-analysis	PSYCHOLOGICAL MEDICINE	51	3	387	399	PII S0033291721000362	10.1017/S0033291721000362	2021	WOS:000627866800004
7	3.6.3	Tozzi, Leonardo; Zhang, Xue; Chesnut, Megan; Holt-Gosselin, Bailey; Ramirez, Carolina A.; Williams, Leanne M.	Reduced functional connectivity of default mode network subsystems in depression: Meta-analytic evidence and relationship with trait rumination	NEUROIMAGE-CLINICAL	30				102570	10.1016/j.nicl.2021.102570	2021	WOS:000661170900008
3	6.12	Chavanne, Alice, V; Robinson, Oliver J.	The Overlapping Neurobiology of Induced and Pathological Anxiety: A Meta-Analysis of Functional Neural Activation	AMERICAN JOURNAL OF PSYCHIATRY	178	2	156	164		10.1176/appi.ajp.2020.19111153	2021	WOS:000614609700010
5	0.0.3	Klaus, Jana; Schutter, Dennis J. L. G.	Functional topography of anger and aggression in the human cerebellum	NEUROIMAGE	226				117582	10.1016/j.neuroimage.2020.117582	2021	WOS:000608035900056
1	2.3.2	Messina, Irene; Grecucci, Alessandro; Viviani, Roberto	Neurobiological models of emotion regulation: a meta-analysis of neuroimaging studies of acceptance as an emotion regulation strategy	SOCIAL COGNITIVE AND AFFECTIVE NEUROSCIENCE	16	3	257	267		10.1093/scan/nsab007	2021	WOS:000649383300001
1	3.0.2	Sinha, Preeti; Joshi, Himanshu; Ithal, Dhruva	Resting State Functional Connectivity of Brain With Electroconvulsive Therapy in Depression: Meta-Analysis to Understand Its Mechanisms	FRONTIERS IN HUMAN NEUROSCIENCE	14				616054	10.3389/fnhum.2020.616054	2021	WOS:000614390400001
1	?	Spagna, Alfredo; Hajhajate, Dounia; Liu, Jianghao; Bartolomeo, Paolo	Visual mental imagery engages the left fusiform gyrus, but not the early visual cortex: A meta-analysis of neuroimaging evidence	NEUROSCIENCE AND BIOBEHAVIORAL REVIEWS; NEUROSCIENCE AND BIOBEHAVIORAL REVIEWS	122		201	217		10.1016/j.neubiorev.2020.12.029	2021	WOS:000694856000001
1	3.0.2	Pozzi, Elena; Vijayakumar, Nandita; Rakesh, Divyangana; Whittle, Sarah	Neural Correlates of Emotion Regulation in Adolescents and Emerging Adults: A Meta-analytic Study	BIOLOGICAL PSYCHIATRY	89	2	194	204		10.1016/j.biopsych.2020.08.006	2021	WOS:000601301200012
1	3.0.2	Zhang, Guangyao; Xu, Yangwen; Zhang, Meimei; Wang, Shaonan; Lin, Nan	The brain network in support of social semantic accumulation	SOCIAL COGNITIVE AND AFFECTIVE NEUROSCIENCE	16	4	393	405		10.1093/scan/nsab003	2021	WOS:000649383800004
99		Klugah-Brown, Benjamin; Zhou, Xinqi; Pradhan, Basant K.; Zweerings, Jana; Mathiak, Klaus; Biswal, Bharat; Becker, Benjamin	Common neurofunctional dysregulations characterize obsessive-compulsive, substance use, and gaming disorders-An activation likelihood meta-analysis of functional imaging studies	ADDICTION BIOLOGY; ADDICTION BIOLOGY	26	4			e12997	10.1111/adb.12997	2021	WOS:000606777400001
99		Herz, Damian M.; Meder, David; Camilleri, Julia A.; Eickhoff, Simon B.; Siebner, Hartwig R.	Brain Motor Network Changes in Parkinson's Disease: Evidence from Meta-Analytic Modeling	MOVEMENT DISORDERS	36	5	1180	1190		10.1002/mds.28468	2021	WOS:000606519800001
1	2.3	Ammons, Carla J.; Winslett, Mary-Elizabeth; Kana, Rajesh K.	Neural responses to viewing human faces in autism spectrum disorder: A quantitative meta-analysis of two decades of research	NEUROPSYCHOLOGIA	150				107694	10.1016/j.neuropsychologia.2020.107694	2021	WOS:000620272000006
1	3.0.2	van't Hooft, Jochum J.; Pijnenburg, Yolande A. L.; Sikkes, Sietske A. M.; Scheltens, Philip; Spikman, Jacoba M.; Jaschke, Artur C.; Warren, Jason D.; Tijms, Betty M.	Frontotemporal dementia, music perception and social cognition share neurobiological circuits: A meta-analysis	BRAIN AND COGNITION	148				105660	10.1016/j.bandc.2020.105660	2021	WOS:000674211800002
99		Xu, Anna; Larsen, Bart; Henn, Alina; Baller, Erica B.; Scott, J. Cobb; Sharma, Vaishnavi; Adebimpe, Azeez; Basbaum, Allan I.; Corder, Gregory; Dworkin, Robert H.; Edwards, Robert R.; Woolf, Clifford J.; Eickhoff, Simon B.; Eickhoff, Claudia R.; Satterthwaite, Theodore D.	Brain Responses to Noxious Stimuli in Patients With Chronic Pain A Systematic Review and Meta-analysis	JAMA NETWORK OPEN	4	1			e2032236	10.1001/jamanetworkopen.2020.32236	2021	WOS:000610371800003
3	?	Yang, Liqiong; Xu, Fan; He, Yi; Li, Yanzhang; Chen, Zi; Wang, Shuai	Association Between ZNF804A Gene rs1344706 Polymorphism and Brain Functions in Healthy Individuals: A Systematic Review and Voxel-Based Meta-Analysis	NEUROPSYCHIATRIC DISEASE AND TREATMENT	17		2925	2935		10.2147/NDT.S322114	2021	WOS:000696996300003
1	3.0.2	Yeung, Andy Wai Kan	Neural Correlates of Anti-appetite Medications: An fMRI Meta-analysis	CURRENT NEUROPHARMACOLOGY	19	11	2049	2056		10.2174/1570159X19666210914142227	2021	WOS:000720316400008
1	3.0.2	Meier, Sarah K.; Ray, Kimberly L.; Mastan, Juliana C.; Salvage, Savannah R.; Robin, Donald A.	Meta-analytic connectivity modelling of deception-related brain regions	PLOS ONE	16	8			e0248909	10.1371/journal.pone.0248909	2021	WOS:000729171700003
1	3.0.2	Cortese, Samuele; Aoki, Yuta Y.; Itahashi, Takashi; Castellanos, F. Xavier; Eickhoff, Simon B.	Systematic Review and Meta-analysis: Resting-State Functional Magnetic Resonance Imaging Studies of Attention-Deficit/Hyperactivity Disorder	JOURNAL OF THE AMERICAN ACADEMY OF CHILD AND ADOLESCENT PSYCHIATRY	60	1	61	75		10.1016/j.jaac.2020.08.014	2021	WOS:000600656300018
3	5.15	Qiu, Zeguo; Wang, Junjing	A voxel-wise meta-analysis of task-based functional MRI studies on impaired gain and loss processing in adults with addiction	JOURNAL OF PSYCHIATRY & NEUROSCIENCE	46	1	E128	E146		10.1503/jpn.200047	2021	WOS:000674966900012
1	3.0.2	Cona, Giorgia; Wiener, Martin; Scarpazza, Cristina	From <i>ATOM</i> to <i>GradiATOM</i>: Cortical gradients support time and space processing as revealed by a meta-analysis of neuroimaging studies	NEUROIMAGE	224				117407	10.1016/j.neuroimage.2020.117407	2021	WOS:000600796800029
1	?	Arioli, Maria; Ricciardi, Emiliano; Cattaneo, Zaira	Social cognition in the blind brain: A coordinate-based meta-analysis	HUMAN BRAIN MAPPING	42	5	1243	1256		10.1002/hbm.25289	2021	WOS:000598626500001
1	3.0.2	Tolomeo, Serenella; Yaple, Zachary A.; Yu, Rongjun	Neural representation of prediction error signals in substance users	ADDICTION BIOLOGY	26	3			e12976	10.1111/adb.12976	2021	WOS:000591851000001
1	3.0.2	Phan, Lee; Tariq, Alina; Lam, Garbo; Pang, Elizabeth W.; Alain, Claude	The Neurobiology of Semantic Processing in Autism Spectrum Disorder: An Activation Likelihood Estimation Analysis	JOURNAL OF AUTISM AND DEVELOPMENTAL DISORDERS	51	9	3266	3279		10.1007/s10803-020-04794-9	2021	WOS:000591828300001
1	3.0.2	Fischer, Manda; Moscovitch, Morris; Alain, Claude	A systematic review and meta-analysis of memory-guided attention: Frontal and parietal activation suggests involvement of fronto-parietal networks	WILEY INTERDISCIPLINARY REVIEWS-COGNITIVE SCIENCE	12	1			e1546	10.1002/wcs.1546	2021	WOS:000582301600001
7	?	Bekkali, Soukayna; Youssef, George J.; Donaldson, Peter H.; Albein-Urios, Natalia; Hyde, Christian; Enticott, Peter G.	Is the Putative Mirror Neuron System Associated with Empathy? A Systematic Review and Meta-Analysis	NEUROPSYCHOLOGY REVIEW	31	1	14	57		10.1007/s11065-020-09452-6	2021	WOS:000565472000001
1	2.3.6	Gavazzi, Gioele; Giovannelli, Fabio; Curro, Tommaso; Mascalchi, Mario; Viggiano, Maria Pia	Contiguity of proactive and reactive inhibitory brain areas: a cognitive model based on ALE meta-analyses	BRAIN IMAGING AND BEHAVIOR	15	4	2199	2214		10.1007/s11682-020-00369-5	2021	WOS:000555383800009
3	5.15	Li, Xuqian; Wang, Junjing	Abnormal neural activities in adults and youths with major depressive disorder during emotional processing: a meta-analysis	BRAIN IMAGING AND BEHAVIOR	15	2	1134	1154		10.1007/s11682-020-00299-2	2021	WOS:000552194000001
1	2.3.6	Lee, Moon-Soo; Anumagalla, Purnima; Pavuluri, Mani N.	Individuals with the post-traumatic stress disorder process emotions in subcortical regions irrespective of cognitive engagement: a meta-analysis of cognitive and emotional interface	BRAIN IMAGING AND BEHAVIOR	15	2	941	957		10.1007/s11682-020-00303-9	2021	WOS:000552181000009
1	3.0.2	Yeung, Andy Wai Kan	Structural and functional changes in the brain of patients with Crohn's disease: an activation likelihood estimation meta-analysis	BRAIN IMAGING AND BEHAVIOR	15	2	807	818		10.1007/s11682-020-00291-w	2021	WOS:000528445600002
1	3.0.2	Diveica V.; Koldewyn K.; Binney R.J.	Establishing a role of the semantic control network in social cognitive processing: A meta-analysis of functional neuroimaging studies	NeuroImage	245				118702	10.1016/j.neuroimage.2021.118702	2021	2-s2.0-85118823804
1	3.0.2	Lai M.; Jiang P.; Xu J.; Luo D.; Hao X.; Li J.	Abnormal brain activity in nonsuicidal self-injury: a coordinate-based activation likelihood meta-analysis of functional neuroimaging studies	Psychoradiology	1	4	249	256		10.1093/psyrad/kkab020	2021	2-s2.0-85144675685
1	?	Arioli M.; Gianelli C.; Canessa N.	Neural representation of social concepts: a coordinate-based meta-analysis of fMRI studies	Brain Imaging and Behavior	15	4	1912	1921		10.1007/s11682-020-00384-6	2021	2-s2.0-85090450999
2	?	Sha Z.; Schijven D.; Francks C.	Patterns of brain asymmetry associated with polygenic risks for autism and schizophrenia implicate language and executive functions but not brain masculinization	Molecular Psychiatry	26	12	7652	7660		10.1038/s41380-021-01204-z	2021	2-s2.0-85109351636
3	5.15	Liu X.; Lai H.; Li J.; Becker B.; Zhao Y.; Cheng B.; Wang S.	Gray matter structures associated with neuroticism: A meta-analysis of whole-brain voxel-based morphometry studies	Human Brain Mapping	42	9	2706	2721		10.1002/hbm.25395	2021	2-s2.0-85102275790
1,3	GingerALE: 3.0.2; SDM-PSI: ?	Raimo S.; Cropano M.; Trojano L.; Santangelo G.	The neural basis of gambling disorder: An activation likelihood estimation meta-analysis	Neuroscience and Biobehavioral Reviews	120		279	302		10.1016/j.neubiorev.2020.11.027	2021	2-s2.0-85098772512
4	?	Lau, Way K. W.; Leung, Mei-Kei; Zhang, Ruibin	Hypofunctional connectivity between the posterior cingulate cortex and ventromedial prefrontal cortex in autism: Evidence from coordinate-based meta	PROGRESS IN NEURO-PSYCHOPHARMACOLOGY & BIOLOGICAL PSYCHIATRY	103				109986	10.1016/j.pnpbp.2020.109986	2020	WOS:000541704700017
3	6.11	Dugre, Jules R.; Radua, Joaquim; Carignan-Allard, Matthieu; Dumais, Alexandre; Rubia, Katya; Potvin, Stephane	Neurofunctional abnormalities in antisocial spectrum: A meta-analysis of fMRI studies on Five distinct neurocognitive research domains	NEUROSCIENCE AND BIOBEHAVIORAL REVIEWS	119		168	183		10.1016/j.neubiorev.2020.09.013	2020	WOS:000600573400011
1	3.0.2	Koelsch, Stefan	A coordinate-based meta-analysis of music-evoked emotions	NEUROIMAGE	223				117350	10.1016/j.neuroimage.2020.117350	2020	WOS:000582799600060
1	3.0.2	Kim, Hongkeun	An integrative model of network activity during episodic memory retrieval and a meta-analysis of fMRI studies on source memory retrieval	BRAIN RESEARCH	1747				147049	10.1016/j.brainres.2020.147049	2020	WOS:000572952300007
1	?	Griffith, Frances J.; Bingman, Verner P.	Drawing on the brain: An ALE meta-analysis of functional brain activation during drawing	ARTS IN PSYCHOTHERAPY	71				101690	10.1016/j.aip.2020.101690	2020	WOS:000596851800011
3	5.15	Najafi, Peyman; Carre, Jean-Luc; Ben Salem, Douraied; Brenaut, Emilie; Misery, Laurent; Dufor, Olivier	Central mechanisms of itch: A systematic literature review and meta-analysis	JOURNAL OF NEURORADIOLOGY	47	6	450	457		10.1016/j.neurad.2019.11.005	2020	WOS:000579901200011
1	3.0.2	Morandini, Hugo A. E.; Silk, Timothy J.; Griffiths, Kristi; Rao, Pradeep; Hood, Sean D.; Zepf, Florian D.	Meta-analysis of the neural correlates of vigilant attention in children and adolescents	CORTEX	132		374	385		10.1016/j.cortex.2020.08.008	2020	WOS:000588059000028
2	?	Guedj, Carole; Vuilleumier, Patrik	Functional connectivity fingerprints of the human pulvinar: Decoding its role in cognition	NEUROIMAGE	221				117162	10.1016/j.neuroimage.2020.117162	2020	WOS:000600795000027
18	?	Chuan-Peng, Hu; Huang, Yi; Eickhoff, Simon B.; Peng, Kaiping; Sui, Jie	Seeking the "Beauty Center" in the Brain: A Meta-Analysis of fMRI Studies of Beautiful Human Faces and Visual Art; Shared neural basis for experiencing the beauty of human faces and visual art: Evidence from a meta-analyses of fMRI studies	COGNITIVE AFFECTIVE & BEHAVIORAL NEUROSCIENCE; COGNITIVE AFFECTIVE & BEHAVIORAL NEUROSCIENCE	20	6	1200	1215		10.3758/s13415-020-00827-z	2020	WOS:000580955700001
3	5.15	Gong, Jiaying; Wang, Junjing; Qiu, Shaojuan; Chen, Pan; Luo, Zhenye; Wang, Jurong; Huang, Li; Wang, Ying	Common and distinct patterns of intrinsic brain activity alterations in major depression and bipolar disorder: voxel-based meta-analysis	TRANSLATIONAL PSYCHIATRY	10	1			353	10.1038/s41398-020-01036-5	2020	WOS:000583364200002
1	3.0.2	Baetens, Kris; Firouzi, Mahyar; Van Overwalle, Frank; Deroost, Natacha	Involvement of the cerebellum in the serial reaction time task (SRT) (Response to Janacsek et al.)	NEUROIMAGE	220				117114	10.1016/j.neuroimage.2020.117114	2020	WOS:000579184700061
2	?	McDermott, Timothy J.; Kirlic, Namik; Akeman, Elisabeth; Touthang, James; Cosgrove, Kelly T.; DeVille, Danielle C.; Clausen, Ashley N.; White, Evan J.; Kuplicki, Rayus; Aupperle, Robin L.	Visual cortical regions show sufficient test-retest reliability while salience regions are unreliable during emotional face processing	NEUROIMAGE	220				117077	10.1016/j.neuroimage.2020.117077	2020	WOS:000579184700034
1	2.3.6	Xu, Wenwen; Chen, Shanshan; Xue, Chen; Hui, Guanjie; Ma, Wenying; Qi, Wenzhang; Lin, Xingjian; Chen, Jiu	Functional MRI-Specific Alterations in Executive Control Network in Mild Cognitive Impairment: An ALE Meta-Analysis	FRONTIERS IN AGING NEUROSCIENCE	12				578863	10.3389/fnagi.2020.578863	2020	WOS:000581112800001
1	?	Du, Ying; Lee, Yujun; He, Chuan; Peng, Lihan; Yong, Qian; Cen, Zhiyi; Chen, Yuqin; Liu, Xin; Wang, Xiaoming	The changed functional status of the brain was involved in patients with poststroke aphasia: Coordinate-based (activation likelihood estimation) meta-analysis	BRAIN AND BEHAVIOR	10	12			e01867	10.1002/brb3.1867	2020	WOS:000575293700001
1	2.3.6	May, Kaitlyn E.; Kana, Rajesh K.	Frontoparietal Network in Executive Functioning in Autism Spectrum Disorder	AUTISM RESEARCH	13	10	1762	1777		10.1002/aur.2403	2020	WOS:000574898800001
2	?	Chiou, Rocco; Humphreys, Gina F.; Ralph, Matthew A. Lambon	Bipartite Functional Fractionation within the Default Network Supports Disparate Forms of Internally Oriented Cognition	CEREBRAL CORTEX	30	10	5484	5501		10.1093/cercor/bhaa130	2020	WOS:000580998000024
3	?	Chan, Melody M. Y.; Han, Yvonne M. Y.	Differential mirror neuron system (MNS) activation during action observation with and without social-emotional components in autism: a meta-analysis of neuroimaging studies	MOLECULAR AUTISM	11	1			72	10.1186/s13229-020-00374-x	2020	WOS:000576903500002
1	2.3.6	Lee, Sung-Mu; Henson, Richard N.; Lin, Chun-Yu	Neural Correlates of Repetition Priming: A Coordinate-Based Meta-Analysis of fMRI Studies	FRONTIERS IN HUMAN NEUROSCIENCE	14				565114	10.3389/fnhum.2020.565114	2020	WOS:000576439100001
7	?	Gray, Oliver; Fry, Lewis; Montaldi, Daniela	Information content best characterises the hemispheric selectivity of the inferior parietal lobe: a meta-analysis	SCIENTIFIC REPORTS	10	1			15112	10.1038/s41598-020-72228-8	2020	WOS:000573754300004
1	3.0.2	Klugah-Brown, Benjamin; Di, Xin; Zweerings, Jana; Mathiak, Klaus; Becker, Benjamin; Biswal, Bharat	Common and separable neural alterations in substance use disorders: A coordinate-based meta-analyses of functional neuroimaging studies in humans; Common and separable neural alterations in substance use disorders: evidence from coordinate-based meta-analyses of functional neuroimaging studies in human	HUMAN BRAIN MAPPING; HUMAN BRAIN MAPPING	41	16	4459	4477		10.1002/hbm.25085	2020	WOS:000567993800001
2	?	Van Overwalle, Frank; Ma, Qianying; Heleven, Elien	The posterior crus II cerebellum is specialized for social mentalizing and emotional self-experiences: a meta-analysis	SOCIAL COGNITIVE AND AFFECTIVE NEUROSCIENCE	15	9	905	+		10.1093/scan/nsaa124	2020	WOS:000593183400001
1	2.3.5	Morawetz, Carmen; Riedel, Michael C.; Salo, Taylor; Berboth, Stella; Eickhoff, Simon B.; Laird, Angela R.; Kohn, Nils	Multiple large-scale neural networks underlying emotion regulation	NEUROSCIENCE AND BIOBEHAVIORAL REVIEWS	116		382	395		10.1016/j.neubiorev.2020.07.001	2020	WOS:000557868200028
3	4.31	Schurz, Matthias; Maliske, Lara; Kanske, Philipp	Cross-network interactions in social cognition: A review of findings on task related brain activation and connectivity	CORTEX	130		142	157		10.1016/j.cortex.2020.05.006	2020	WOS:000561935500011
1	2.3.6	Courson, Melody; Tremblay, Pascale	Neural correlates of manual action language: Comparative review, ALE meta-analysis and ROI meta-analysis	NEUROSCIENCE AND BIOBEHAVIORAL REVIEWS	116		221	238		10.1016/j.neubiorev.2020.06.025	2020	WOS:000557868200019
2	?	Prado, Jerome; Leone, Jessica; Epinat-Duclos, Justine; Trouche, Emmanuel; Mercier, Hugo	The neural bases of argumentative reasoning	BRAIN AND LANGUAGE	208				104827	10.1016/j.bandl.2020.104827	2020	WOS:000556838300003
1	3.0.2	Cogdell-Brooke, Lucy S.; Sowden, Paul T.; Violante, Ines R.; Thompson, Hannah E.	A meta-analysis of functional magnetic resonance imaging studies of divergent thinking using activation likelihood estimation	HUMAN BRAIN MAPPING	41	17	5057	5077		10.1002/hbm.25170	2020	WOS:000562511400001
1	2.3.6	Sheets, John R.; Briggs, Robert G.; Bai, Michael Y.; Poologaindran, Anujan; Young, Isabella M.; Conner, Andrew K.; Baker, Cordell M.; Glenn, Chad A.; Sughrue, Michael E.	Parcellation-based modeling of the dorsal premotor area	JOURNAL OF THE NEUROLOGICAL SCIENCES	415				116907	10.1016/j.jns.2020.116907	2020	WOS:000549390100023
2	?	Luckett, Patrick; Lee, John J.; Park, Ki Yun; Dierker, Donna; Daniel, Andy G. S.; Seitzman, Benjamin A.; Hacker, Carl D.; Ances, Beau M.; Leuthardt, Eric C.; Snyder, Abraham Z.; Shimony, Joshua S.	Mapping of the Language Network With Deep Learning	FRONTIERS IN NEUROLOGY	11				819	10.3389/fneur.2020.00819	2020	WOS:000563210600001
21	?	Kocar, Thomas Derya; Mueller, Hans-Peter; Kassubek, Jan	Differential functional connectivity in thalamic and dopaminergic pathways in restless legs syndrome: a meta-analysis	THERAPEUTIC ADVANCES IN NEUROLOGICAL DISORDERS	13				1756286420941670	10.1177/1756286420941670	2020	WOS:000559049700001
2	?	Cao, Jin; Huang, Yiting; Meshberg, Nathaniel; Hodges, Sierra A.; Kong, Jian	Neuroimaging-Based Scalp Acupuncture Locations for Dementia	JOURNAL OF CLINICAL MEDICINE	9	8			2477	10.3390/jcm9082477	2020	WOS:000564686500001
1,2	GingerALE: 3.0.2; Neurosynth: ?	Hung, Jinyi; Wang, Xiaoying; Wang, Xiaosha; Bi, Yanchao	Functional subdivisions in the anterior temporal lobes: a large scale meta-analytic investigation	NEUROSCIENCE AND BIOBEHAVIORAL REVIEWS	115		134	145		10.1016/j.neubiorev.2020.05.008	2020	WOS:000579731200014
1	?	Wu, Dongya; Jiang, Tianzi	Schizophrenia-related abnormalities in the triple network: a meta-analysis of working memory studies	BRAIN IMAGING AND BEHAVIOR	14	4	971	980		10.1007/s11682-019-00071-1	2020	WOS:000552051500003
3	?	Li, Huiru; Chen, Ziqi; Gong, Qiyong; Jia, Zhiyun	Voxel-wise meta-analysis of task-related brain activation abnormalities in major depressive disorder with suicide behavior	BRAIN IMAGING AND BEHAVIOR	14	4	1298	1308		10.1007/s11682-019-00045-3	2020	WOS:000552051500029
3	6.21	Lin, XiaoGuang; Zhen, Dan; Li, HuaLiang; Zhong, JianGuo; Dai, ZhenYu; Yuan, CongHu; Pan, PingLei	Altered local connectivity in chronic pain A voxel-wise meta-analysis of resting-state functional magnetic resonance imaging studies	MEDICINE	99	31				10.1097/MD.0000000000021378	2020	WOS:000562693800057
1	3	Zhang, Han; Hao, Shuji; Lee, Annie; Eickhoff, Simon B.; Pecheva, Diliana; Cai, Shirong; Meaney, Michael; Chong, Yap-Seng; Broekman, Birit F. P.; Fortier, Marielle V.; Qiu, Anqi	Do intrinsic brain functional networks predict working memory from childhood to adulthood?	HUMAN BRAIN MAPPING	41	16	4574	4586		10.1002/hbm.25143	2020	WOS:000553581400001
3	?	Yaple, Zachary A.; Yu, Rongjun	Upward and downward comparisons across monetary and status domains	HUMAN BRAIN MAPPING	41	16	4662	4675		10.1002/hbm.25148	2020	WOS:000551282600001
1	3.0.2	Enge, Alexander; Friederici, Angela D.; Skeide, Michael A.	A meta-analysis of fMRI studies of language comprehension in children	NEUROIMAGE	215				116858	10.1016/j.neuroimage.2020.116858	2020	WOS:000539990400023
1	2.3.6	Yaple, Zachary A.; Yu, Rongjun; Arsalidou, Marie	Spatial migration of human reward processing with functional development: Evidence from quantitative meta-analyses	HUMAN BRAIN MAPPING	41	14	3993	4009		10.1002/hbm.25103	2020	WOS:000545948000001
1	2.3.6	Fallon, Nicholas; Roberts, Carl; Stancak, Andrej	Shared and distinct functional networks for empathy and pain processing: a systematic review and meta-analysis of fMRI studies	SOCIAL COGNITIVE AND AFFECTIVE NEUROSCIENCE	15	7	709	723		10.1093/scan/nsaa090	2020	WOS:000593186300001
3	?	Arsalidou, Marie; Yaple, Zachary; Jurcik, Tomas; Ushakov, Vadim	Cognitive Brain Signatures of Youth With Early Onset and Relatives With Schizophrenia: Evidence From fMRI Meta-analyses	SCHIZOPHRENIA BULLETIN	46	4	857	868		10.1093/schbul/sbz130	2020	WOS:000593171600018
1	3.0.2	Long, Xipeng; Tian, Fangfang; Zhou, Yushan; Cheng, Bochao; Jia, Zhiyun	Different Neural Correlates of Sexually Preferred and Sexually Stimuli	JOURNAL OF SEXUAL MEDICINE	17	7	1254	1267		10.1016/j.jsxm.2020.03.007	2020	WOS:000547841000012
3	5.141	Suarez-Jimenez, Benjamin; Albajes-Eizagirre, Anton; Lazarov, Amit; Zhu, Xi; Harrison, Ben J.; Radua, Joaquim; Neria, Yuval; Fullana, Miquel A.	Neural signatures of conditioning, extinction learning, and extinction recall in posttraumatic stress disorder: a meta-analysis of functional magnetic resonance imaging studies	PSYCHOLOGICAL MEDICINE	50	9	1442	1451	PII S0033291719001387	10.1017/S0033291719001387	2020	WOS:000553814400004
2	?	Gamboa, Olga Lucia; Brito, Alexandra; Abzug, Zachary; D'Arbeloff, Tracy; Beynel, Lysianne; Wing, Erik A.; Dannhauer, Moritz; Palmer, Hannah; Hilbig, Susan A.; Crowell, Courtney A.; Liu, Sicong; Donaldson, Rachel; Cabeza, Roberto; Davis, Simon W.; Peterchev, Angel, V; Sommer, Marc A.; Appelbaum, Lawrence G.	Application of long-interval paired-pulse transcranial magnetic stimulation to motion-sensitive visual cortex does not lead to changes in motion discrimination	NEUROSCIENCE LETTERS	730				135022	10.1016/j.neulet.2020.135022	2020	WOS:000539450500006
1,3	GingerALE: 2.3.6; SDM-PSI: 5.141	Chen, Eunice Y.; Zeffiro, Thomas A.	Hunger and BMI modulate neural responses to sweet stimuli: fMRI meta-analysis	INTERNATIONAL JOURNAL OF OBESITY	44	8	1636	1652		10.1038/s41366-020-0608-5	2020	WOS:000541222600001
1	3.0.2	Zito, Giuseppe A.; Wiest, Roland; Aybek, Selma	Neural correlates of sense of agency in motor control: A neuroimaging meta-analysis	PLOS ONE	15	6			e0234321	10.1371/journal.pone.0234321	2020	WOS:000542035700029
3	6.21	Dahlgren, Kristina; Ferris, Charles; Hamann, Stephan	Neural correlates of successful emotional episodic encoding and retrieval: An SDM meta-analysis of neuroimaging studies	NEUROPSYCHOLOGIA	143				107495	10.1016/j.neuropsychologia.2020.107495	2020	WOS:000541000900020
3	5.15	Jiang, Binghu; He, Dongmei; Guo, Zhiwei; Gao, Zhanhui	Effect-size seed-based <i>d</i> mapping of resting-state fMRI for persistent insomnia disorder	SLEEP AND BREATHING	24	2	653	659		10.1007/s11325-019-02001-3	2020	WOS:000540152400029
1	3.0.2	Quaglieri, Alessandro; Mari, Emanuela; Boccia, Maddalena; Piccardi, Laura; Guariglia, Cecilia; Giannini, Anna Maria	Brain Network Underlying Executive Functions in Gambling and Alcohol Use Disorders: An Activation Likelihood Estimation Meta-Analysis of fMRI Studies	BRAIN SCIENCES	10	6			353	10.3390/brainsci10060353	2020	WOS:000551573700001
1	2.3.6	Roberts, Carl A.; Giesbrecht, Timo; Fallon, Nicholas; Thomas, Anna; Mela, David J.; Kirkham, Tim C.	A Systematic Review and Activation Likelihood Estimation Meta-Analysis of fMRI Studies on Sweet Taste in Humans	JOURNAL OF NUTRITION	150	6	1619	1630		10.1093/jn/nxaa071	2020	WOS:000556185000032
2	?	Stefanova, Elka; Dubljevic, Olga; Herbert, Cornelia; Fairfield, Beth; Schroeter, Matthias L.; Stern, Emily R.; Urben, Sebastien; Derntl, Birgit; Wiebking, Christine; Brown, Carina; Drach-Zahavy, Anat; Loeffler, Leonie Anne Kathrin; Albrecht, Franziska; Palumbo, Rocco; Boutros, Sydney Weber; Raber, Jacob; Lowe, Leroy	Anticipatory feelings: Neural correlates and linguistic markers	NEUROSCIENCE AND BIOBEHAVIORAL REVIEWS	113		308	324		10.1016/j.neubiorev.2020.02.015	2020	WOS:000531531100022
2	?	Zhang, Binlong; Liu, Jiao; Bao, Tuya; Wilson, Georgia; Park, Joel; Zhao, Bingcong; Kong, Jian	Locations for noninvasive brain stimulation in treating depressive disorders: A combination of meta-analysis and resting-state functional connectivity analysis	AUSTRALIAN AND NEW ZEALAND JOURNAL OF PSYCHIATRY	54	6	582	590	4867420920372	10.1177/0004867420920372	2020	WOS:000533942200001
2	?	Huang, Yiting; Zhang, Binlong; Cao, Jin; Yu, Siyi; Wilson, Georgia; Park, Joel; Kong, Jian	Potential Locations for Noninvasive Brain Stimulation in Treating Autism Spectrum Disorders-A Functional Connectivity Study	FRONTIERS IN PSYCHIATRY	11				388	10.3389/fpsyt.2020.00388	2020	WOS:000536689100001
4	?	Deming, Philip; Koenigs, Michael	Functional neural correlates of psychopathy: a meta-analysis of MRI data	TRANSLATIONAL PSYCHIATRY	10	1			133	10.1038/s41398-020-0816-8	2020	WOS:000533977600003
1	3.0.2	Liu, Wei; Peeters, Nancy; Fernandez, Guillen; Kohn, Nils	Common neural and transcriptional correlates of inhibitory control underlie emotion regulation and memory control	SOCIAL COGNITIVE AND AFFECTIVE NEUROSCIENCE; SOCIAL COGNITIVE AND AFFECTIVE NEUROSCIENCE	15	5	523	536		10.1093/scan/nsaa073	2020	WOS:000562476300002
1	3.0.2	Griffa, Alessandra; Van De Ville, Dimitri; Herrmann, Francois R.; Allali, Gilles	Neural circuits of idiopathic Normal Pressure Hydrocephalus: A perspective review of brain connectivity and symptoms meta-analysis	NEUROSCIENCE AND BIOBEHAVIORAL REVIEWS	112		452	471		10.1016/j.neubiorev.2020.02.023	2020	WOS:000531016100032
99		Xu, Anna; Larsen, Bart; Baller, Erica B.; Scott, J. Cobb; Sharma, Vaishnavi; Adebimpe, Azeez; Basbaum, Allan I.; Dworkin, Robert H.; Edwards, Robert R.; Woolf, Clifford J.; Eickhoff, Simon B.; Eickhoff, Claudia R.; Satterthwaite, Theodore D.	Convergent neural representations of experimentally-induced acute pain in healthy volunteers: A large-scale fMRI meta-analysis	NEUROSCIENCE AND BIOBEHAVIORAL REVIEWS	112		300	323		10.1016/j.neubiorev.2020.01.004	2020	WOS:000531016100019
3	5.141	Pico-Perez, Maria; Moreira, Pedro Silva; Ferreira, Vanessa de Melo; Radua, Joaquim; Mataix-Cols, David; Sousa, Nuno; Soriano-Mas, Carles; Morgado, Pedro	Modality-specific overlaps in brain structure and function in obsessive-compulsive disorder: Multimodal meta-analysis of case-control MRI studies	NEUROSCIENCE AND BIOBEHAVIORAL REVIEWS	112		83	94		10.1016/j.neubiorev.2020.01.033	2020	WOS:000531016100006
2	?	Grady, Cheryl L.	Meta-analytic and functional connectivity evidence from functional magnetic resonance imaging for an anterior to posterior gradient of function along the hippocampal axis	HIPPOCAMPUS	30	5	456	471		10.1002/hipo.23164	2020	WOS:000526060000002
1	2.3.6	Peng, Ziwen; Chen, Jierong; Jin, Lili; Han, Hongying; Dong, Chenjie; Guo, Ya; Kong, Xuejun; Wan, Guobin; Wei, Zhen	Social brain dysfunctionality in individuals with autism spectrum disorder and their first-degree relatives: An activation likelihood estimation meta-analysis	PSYCHIATRY RESEARCH-NEUROIMAGING	298				111063	10.1016/j.pscychresns.2020.111063	2020	WOS:000522636000004
99		Chase, Henry W.; Grace, Anthony A.; Fox, Peter T.; Phillips, Mary L.; Eickhoff, Simon B.	Functional differentiation in the human ventromedial frontal lobe: A data-driven parcellation	HUMAN BRAIN MAPPING	41	12	3266	3283		10.1002/hbm.25014	2020	WOS:000527202000001
1	?	Jiang, Yihan; Li, Zheng; Zhao, Yang; Xiao, Xiang; Zhang, Wei; Sun, Peipei; Yang, Yihong; Zhu, Chaozhe	Targeting brain functions from the scalp: Transcranial brain atlas based on large-scale fMRI data synthesis	NEUROIMAGE	210				116550	10.1016/j.neuroimage.2020.116550	2020	WOS:000517885300038
3	?	Lukito, Steve; Norman, Luke; Carlisi, Christina; Radua, Joaquim; Hart, Heledd; Simonoff, Emily; Rubia, Katya	Comparative meta-analyses of brain structural and functional abnormalities during cognitive control in attention-deficit/hyperactivity disorder and autism spectrum disorder	PSYCHOLOGICAL MEDICINE	50	6	894	919	PII S0033291720000574	10.1017/S0033291720000574	2020	WOS:000529554900002
4	?	Tervo-Clemmens, Brenden; Quach, Alina; Calabro, Finnegan J.; Foran, William; Luna, Beatriz	Meta-analysis and review of functional neuroimaging differences underlying adolescent vulnerability to substance use	NEUROIMAGE	209				116476	10.1016/j.neuroimage.2019.116476	2020	WOS:000517885100024
4	?	Fede, Samantha J.; Kiehl, Kent A.	Meta-analysis of the moral brain: patterns of neural engagement assessed using multilevel kernel density analysis	BRAIN IMAGING AND BEHAVIOR	14	2	534	547		10.1007/s11682-019-00035-5	2020	WOS:000526064200023
1	3	Zhang, Zheng; Peng, Peng; Zhang, Delong	Executive Function in High-Functioning Autism Spectrum Disorder: A Meta-analysis of fMRI Studies	JOURNAL OF AUTISM AND DEVELOPMENTAL DISORDERS	50	11	4022	4038		10.1007/s10803-020-04461-z	2020	WOS:000565699600001
1	3	Clark, Sarah V.; King, Tricia Z.; Turner, Jessica A.	Cerebellar Contributions to Proactive and Reactive Control in the Stop Signal Task: A Systematic Review and Meta-Analysis of Functional Magnetic Resonance Imaging Studies	NEUROPSYCHOLOGY REVIEW	30	3	362	385		10.1007/s11065-020-09432-w	2020	WOS:000520821100001
3	5.14	Lin, Xiao; Deng, Jiahui; Shi, Le; Wang, Qiandong; Li, Peng; Li, Hui; Liu, Jiajia; Que, Jianyu; Chang, Suhua; Bao, Yanping; Shi, Jie; Weinberger, Daniel R.; Wu, Ping; Lu, Lin	Neural substrates of smoking and reward cue reactivity in smokers: a meta-analysis of fMRI studies	TRANSLATIONAL PSYCHIATRY	10	1			97	10.1038/s41398-020-0775-0	2020	WOS:000522202800002
1	2.3.6	Sato, Marc	The neurobiology of sex differences during language processing in healthy adults: A systematic review and a meta-analysis	NEUROPSYCHOLOGIA	140				107404	10.1016/j.neuropsychologia.2020.107404	2020	WOS:000522136500013
1	2.3.6	Meng, Xia; Huang, Duo; Ao, Hua; Wang, Xinyu; Gao, Xiao	Food cue recruits increased reward processing and decreased inhibitory control processing in the obese/overweight: An activation likelihood estimation meta-analysis of fMRI studies	OBESITY RESEARCH & CLINICAL PRACTICE	14	2	127	135		10.1016/j.orcp.2020.02.004	2020	WOS:000535748900004
1	3	Mencarelli, Lucia; Biagi, Maria Chiara; Salvador, Ricardo; Romanella, Sara; Ruffini, Giulio; Rossi, Simone; Santarnecchi, Emiliano	Network Mapping of Connectivity Alterations in Disorder of Consciousness: Towards Targeted Neuromodulation	JOURNAL OF CLINICAL MEDICINE	9	3			828	10.3390/jcm9030828	2020	WOS:000527278800217
1	2.3.6	Liu, Anli; Friedman, Daniel; Barron, Daniel S.; Wang, Xiuyuan; Thesen, Thomas; Dugan, Patricia	Forced conceptual thought induced by electrical stimulation of the left prefrontal gyrus involves widespread neural networks	EPILEPSY & BEHAVIOR	104				106644	10.1016/j.yebeh.2019.106644	2020	WOS:000518223500010
1	2.3.6	Wang, Qiang; Zhang, Han; Poh, Joann S.; Pecheva, Diliana; Broekman, Birit F. P.; Chong, Yap-Seng; Shek, Lynette P.; Gluckman, Peter D.; Fortier, Marielle V.; Meaney, Michael J.; Qiu, Anqi	Sex-Dependent Associations among Maternal Depressive Symptoms, Child Reward Network, and Behaviors in Early Childhood	CEREBRAL CORTEX	30	3	901	912		10.1093/cercor/bhz135	2020	WOS:000535899500005
3	5.14	Tian, Fangfang; Diao, Wei; Yang, Xun; Wang, Xiuli; Roberts, Neil; Feng, Can; Jia, Zhiyun	Failure of activation of striatum during the performance of executive function tasks in adult patients with bipolar disorder	PSYCHOLOGICAL MEDICINE	50	4	653	665		10.1017/S0033291719000473	2020	WOS:000529434200013
3	?	Dahlberg, Linda Solstrand; Lungu, Ovidiu; Doyon, Julien	Cerebellar Contribution to Motor and Non-motor Functions in Parkinson's Disease: A Meta-Analysis of fMRI Findings	FRONTIERS IN NEUROLOGY	11				127	10.3389/fneur.2020.00127	2020	WOS:000524573600001
1	2.3.6	Janacsek, Karolina; Shattuck, Kyle F.; Tagarelli, Kaitlyn M.; Lum, Jarrad A. G.; Turkeltaub, Peter E.; Ullman, Michael T.	Sequence learning in the human brain: A functional neuroanatomical meta-analysis of serial reaction time studies	NEUROIMAGE	207				116387	10.1016/j.neuroimage.2019.116387	2020	WOS:000509662600046
2	?	Votinov, Mikhail; Wagels, Lisa; Hoffstaedter, Felix; Kellermann, Thilo; Goerlich, Katharina S.; Eickhoff, Simon B.; Habel, Ute	Effects of exogenous testosterone application on network connectivity within emotion regulation systems	SCIENTIFIC REPORTS	10	1			2352	10.1038/s41598-020-59329-0	2020	WOS:000562858200003
2	?	Wang, Kai; Banich, Marie T.; Reineberg, Andrew E.; Leopold, Daniel R.; Willcutt, Erik G.; Cutting, Laurie E.; Del Tufo, Stephanie N.; Thompson, Lee A.; Opfer, John; Kanayet, Frank J.; Lu, Zhong-Lin; Petrill, Stephen A.	Left posterior prefrontal regions support domain-general executive processes needed for both reading and math	JOURNAL OF NEUROPSYCHOLOGY	14	3	467	495		10.1111/jnp.12201	2020	WOS:000511655300001
2	?	Battistella, Giovanni; Borghesani, Valentina; Henry, Maya; Shwe, Wendy; Lauricella, Michael; Miller, Zachary; Deleon, Jessica; Miller, Bruce L.; Dronkers, Nina; Brambati, Simona M.; Seeley, William W.; Mandelli, Maria Luisa; Gorno-Tempini, Maria Luisa	Task-Free Functional Language Networks: Reproducibility and Clinical Application	JOURNAL OF NEUROSCIENCE	40	6	1311	1320		10.1523/JNEUROSCI.1485-19.2019	2020	WOS:000512880800013
1	3.0.2	Ding, Rui; Ren, Jie; Li, Shuaixia; Zhu, Xiaowen; Zhang, Keye; Luo, Wenbo	Domain-general and domain-preferential neural correlates underlying empathy towards physical pain, emotional situation and emotional faces: An ALE meta-analysis	NEUROPSYCHOLOGIA	137				107286	10.1016/j.neuropsychologia.2019.107286	2020	WOS:000509751200005
1	2.3.6	Heard, Matthew; Lee, Yune S.	Shared neural resources of rhythm and syntax: An ALE meta-analysis	NEUROPSYCHOLOGIA	137				107284	10.1016/j.neuropsychologia.2019.107284	2020	WOS:000509751200004
3	5.141	Saarinen, Aino I. L.; Huhtaniska, Sanna; Pudas, Juho; Bjornholm, Lassi; Jukuri, Tuomas; Tohka, Jussi; Grano, Niklas; Barnett, Jennifer H.; Kiviniemi, Vesa; Veijola, Juha; Hintsanen, Mirka; Lieslehto, Johannes	Structural and functional alterations in the brain gray matter among first-degree relatives of schizophrenia patients: A multimodal meta-analysis of fMRI and VBM studies	SCHIZOPHRENIA RESEARCH	216		14	23		10.1016/j.schres.2019.12.023	2020	WOS:000535701000006
1	?	Saarinen, Aino; Lieslehto, Johannes; Kiviniemi, Vesa; Hakli, Jani; Tuovinen, Timo; Hintsanen, Mirka; Veijola, Juha	Symptomatic psychosis risk and physiological fluctuation in functional MRI data	SCHIZOPHRENIA RESEARCH	216		339	346		10.1016/j.schres.2019.11.029	2020	WOS:000535699400004
3	?	Zhou, Hui-Xia; Chen, Xiao; Shen, Yang-Qian; Li, Le; Chen, Ning-Xuan; Zhu, Zhi-Chen; Castellanos, Francisco Xavier; Yan, Chao-Gan	Rumination and the default mode network: Meta-analysis of brain imaging studies and implications for depression	NEUROIMAGE	206				116287	10.1016/j.neuroimage.2019.116287	2020	WOS:000507987000038
18	?	Janiri, Delfina; Moser, Dominik A.; Doucet, Gaelle E.; Luber, Maxwell J.; Rasgon, Alexander; Lee, Won Hee; Murrough, James W.; Sani, Gabriele; Eickhoff, Simon B.; Frangou, Sophia	Shared Neural Phenotypes for Mood and Anxiety Disorders A Meta-analysis of 226 Task-Related Functional Imaging Studies	JAMA PSYCHIATRY	77	2	172	179		10.1001/jamapsychiatry.2019.3351	2020	WOS:000512049000012
1	?	Makovac, Elena; Fagioli, Sabrina; Rae, Charlotte L.; Critchley, Hugo D.; Ottaviani, Cristina	Can't get it off my brain: Meta-analysis of neuroimaging studies on perseverative cognition	PSYCHIATRY RESEARCH-NEUROIMAGING	295				111020	10.1016/j.pscychresns.2019.111020	2020	WOS:000504338100004
99		Schnellbaecher, Gereon J.; Hoffstaedter, Felix; Eickhoff, Simon B.; Caspers, Svenja; Nickl-Jockschat, Thomas; Fox, Peter T.; Laird, Angela R.; Schulz, Joerg B.; Reetz, Kathrin; Dogan, Imis	Functional Characterization of Atrophy Patterns Related to Cognitive Impairment	FRONTIERS IN NEUROLOGY	11				18	10.3389/fneur.2020.00018	2020	WOS:000529929300001
1	2.3.6	Huang, Yujing; Su, Li; Ma, Qingguo	The Stroop effect: An activation likelihood estimation meta-analysis in healthy young adults	NEUROSCIENCE LETTERS	716				134683	10.1016/j.neulet.2019.134683	2020	WOS:000509614400005
22		Toro-Serey, Claudio; Tobyne, Sean M.; McGuire, Joseph T.	Spectral partitioning identifies individual heterogeneity in the functional network topography of ventral and anterior medial prefrontal cortex	NEUROIMAGE; NEUROIMAGE	205				116305	10.1016/j.neuroimage.2019.116305	2020	WOS:000502357600019
16	?	Tench, C. R.; Tanasescu, Radu; Constantinescu, C. S.; Cottam, W. J.; Auer, D. P.	Coordinate based meta-analysis of networks in neuroimaging studies	NEUROIMAGE	205				116259	10.1016/j.neuroimage.2019.116259	2020	WOS:000502357600007
1	3.0.2	Arsalidou, Marie; Vijayarajah, Sagana; Sharaev, Maksim	Basal ganglia lateralization in different types of reward	BRAIN IMAGING AND BEHAVIOR	14	6	2618	2646		10.1007/s11682-019-00215-3	2020	WOS:000574093200001
2	?	Kang, Yafei; Zhang, Wei; Lv, Yahui; Xu, Hanxiao; Lin, Yanyan; Cai, Suping; Wang, Jijun; Huang, Liyu	Genetic polymorphism in catechol-O-methyltransferase associated with the functional connectivity of frontostriatal circuits in first episode schizophrenia patients	EUROPEAN JOURNAL OF NEUROSCIENCE	51	10	2134	2142		10.1111/ejn.14659	2020	WOS:000506024100001
1	3.0.2	Zhang, Jun; Wang, Runpei; Wang, Haili; Li, Yuping; Zhang, Hongying; Dong, Lun; Zhang, Hengzhu	Activation of brain regions using task-state FMRI in patients with mild traumatic brain injury: a meta-analysis	INTERNATIONAL JOURNAL OF CLINICAL AND EXPERIMENTAL PATHOLOGY	13	12	2918	2926			2020	WOS:000605584900002
2	?	Kong, Xiang-Zhen; Tzourio-Mazoyer, Nathalie; Joliot, Marc; Fedorenko, Evelina; Liu, Jia; Fisher, Simon E.; Francks, Clyde	Gene Expression Correlates of the Cortical Network Underlying Sentence Processing	NEUROBIOLOGY OF LANGUAGE	1	1	77	103		10.1162/nol_a_00004	2020	WOS:000911608500005
18	?	Doucet, Gaelle E.; Janiri, Delfina; Howard, Rebecca; O'Brien, Madeline; Andrews-Hanna, Jessica R.; Frangou, Sophia	Transdiagnostic and disease-specific abnormalities in the default-mode network hubs in psychiatric disorders: A meta-analysis of resting-state functional imaging studies	EUROPEAN PSYCHIATRY	63	1			e57	10.1192/j.eurpsy.2020.57	2020	WOS:000544522600001
1	3.0.2	Snyder, William; Troiani, Vanessa	Behavioural profiling of autism connectivity abnormalities	BJPSYCH OPEN	6	1			e11	10.1192/bjo.2019.102	2020	WOS:000508431200001
1	2.3.6	Cook, Michael J.; Gardner, Andrew J.; Wojtowicz, Magdalena; Williams, W. Huw; Iverson, Grant L.; Stanwell, Peter	Task-related functional magnetic resonance imaging activations in patients with acute and subacute mild traumatic brain injury: A coordinate-based meta-analysis	NEUROIMAGE-CLINICAL	25				102129	10.1016/j.nicl.2019.102129	2020	WOS:000519535200086
1	2.3.6	Sulpizio, Simone; Del Maschio, Nicola; Fedeli, Davide; Abutalebi, Jubin	Bilingual language processing: A meta-analysis of functional neuroimaging studies	NEUROSCIENCE AND BIOBEHAVIORAL REVIEWS	108		834	853		10.1016/j.neubiorev.2019.12.014	2020	WOS:000505535400054
3	5.141	Gong, Jiaying; Wang, Junjing; Luo, Xiaomei; Chen, Guanmao; Huang, Huiyuan; Huang, Ruiwang; Huang, Li; Wang, Ying	Abnormalities of intrinsic regional brain activity in first-episode and chronic schizophrenia: a meta-analysis of resting-state functional MRI	JOURNAL OF PSYCHIATRY & NEUROSCIENCE	45	1	55	68		10.1503/jpn.180245	2020	WOS:000507582900007
1	2.3.6	Kim, Jeffrey J.; Cunnington, Ross; Kirby, James N.	The neurophysiological basis of compassion: An fMRI meta-analysis of compassion and its related neural processes	NEUROSCIENCE AND BIOBEHAVIORAL REVIEWS	108		112	123		10.1016/j.neubiorev.2019.10.023	2020	WOS:000505535400008
1	2.3.6	Vucurovic, Ksenija; Caillies, Stephanie; Kaladjian, Arthur	Neural correlates of theory of mind and empathy in schizophrenia: An activation likelihood estimation meta-analysis	JOURNAL OF PSYCHIATRIC RESEARCH	120		163	174		10.1016/j.jpsychires.2019.10.018	2020	WOS:000500381100019
3	?	Yaple, Zachary A.; Yu, Rongjun	Functional and Structural Brain Correlates of Socioeconomic Status	CEREBRAL CORTEX	30	1	181	196		10.1093/cercor/bhz080	2020	WOS:000515101400014
1	2.3.6	Dricu, Mihai; Fruhholz, Sascha	A neurocognitive model of perceptual decision-making on emotional signals	HUMAN BRAIN MAPPING	41	6	1532	1556		10.1002/hbm.24893	2020	WOS:000503977000001
1	3	Yang, Mo; Tsai, Shang-Jui; Li, Chiang-Shan R.	Concurrent amygdalar and ventromedial prefrontal cortical responses during emotion processing: a meta-analysis of the effects of valence of emotion and passive exposure versus active regulation	BRAIN STRUCTURE & FUNCTION	225	1	345	363		10.1007/s00429-019-02007-3	2020	WOS:000503676500002
1	2.3.6	Halani, Priyanka Kadam; Andy, Uduak U.; Rao, Hengyi; Arya, Lily A.	Regions of the brain activated in bladder filling vs rectal distention in healthy adults: A meta-analysis of neuroimaging studies	NEUROUROLOGY AND URODYNAMICS	39	1	58	65		10.1002/nau.24221	2020	WOS:000501413100001
1,3	GingerALE: 2.3.6; SDM-PSI: 5.142	Thome, Janine; Terpou, Braeden A.; McKinnon, Margaret C.; Lanius, Ruth A.	The neural correlates of trauma-related autobiographical memory in posttraumatic stress disorder: A meta-analysis	DEPRESSION AND ANXIETY	37	4	321	345		10.1002/da.22977	2020	WOS:000501366100001
1	3	Wu, Tingting; Chen, Caiqi; Spagna, Alfredo; Wu, Xia; Mackie, Melissa-Ann; Russell-Giller, Shira; Xu, Pengfei; Luo, Yue-jia; Liu, Xun; Hof, Patrick R.; Fan, Jin	The functional anatomy of cognitive control: A domain-general brain network for uncertainty processing	JOURNAL OF COMPARATIVE NEUROLOGY	528	8	1265	1292		10.1002/cne.24804	2020	WOS:000501483100001
1	?	Tanzer, Joshua Ray; Weyandt, Lisa	Imaging Happiness: Meta Analysis and Review	JOURNAL OF HAPPINESS STUDIES	21	7	2693	2734		10.1007/s10902-019-00195-7	2020	WOS:000493490900002
1	2.3.6	Bagnis A.; Celeghin A.; Diano M.; Mendez C.A.; Spadaro G.; Mosso C.O.; Avenanti A.; Tamietto M.	Functional neuroanatomy of racial categorization from visual perception: A meta-analytic study	NeuroImage	217				116939	10.1016/j.neuroimage.2020.116939	2020	2-s2.0-85084956887
1	3.0.2	Long Z.; Du L.; Zhao J.; Wu S.; Zheng Q.; Lei X.	Prediction on treatment improvement in depression with resting state connectivity: A coordinate-based meta-analysis	Journal of Affective Disorders	276		62	68		10.1016/j.jad.2020.06.072	2020	2-s2.0-85088103775
1	3.0.2	Devoto F.; Zapparoli L.; Spinelli G.; Scotti G.; Paulesu E.	How the harm of drugs and their availability affect brain reactions to drug cues: a meta-analysis of 64 neuroimaging activation studies	Translational Psychiatry	10	1			429	10.1038/s41398-020-01115-7	2020	2-s2.0-85098475879
3	?	Leroy A.; Amad A.; D'Hondt F.; Pins D.; Jaafari N.; Thomas P.; Jardri R.	Reward anticipation in schizophrenia: A coordinate-based meta-analysis	Schizophrenia Research	218		2	6		10.1016/j.schres.2019.12.041	2020	2-s2.0-85077733477
3	4.31	Qin B.; Yang M.X.; Gao W.; Zhang J.D.; Zhao L.B.; Qin H.X.; Chen H.	Voxel-wise meta-analysis of structural changes in gray matter of parkinson’s disease patients with mild cognitive impairment	Brazilian Journal of Medical and Biological Research	53	6			e9275	10.1590/1414-431x20209275	2020	2-s2.0-85084961650
1	3.0.2	Todorova, Greta Krasimirova; Hatton, Rosalind Elizabeth Mcbean; Pollick, Frank Earl	Biological motion perception in autism spectrum disorder: a meta-analysis	MOLECULAR AUTISM	10	1			49	10.1186/s13229-019-0299-8	2019	WOS:000512087300001
1	2.3.2	Yang, XiaoHong; Li, HuiJie; Lin, Nan; Zhang, XiuPing; Wang, YinShan; Zhang, Ying; Zhang, Qian; Zuo, XiNian; Yang, YuFang	Uncovering cortical activations of discourse comprehension and their overlaps with common large-scale neural networks	NEUROIMAGE	203				116200	10.1016/j.neuroimage.2019.116200	2019	WOS:000496900900009
1,2	GingerALE: 2.3.6; Neurosynth: ?	Andrzejewski, Jeremy A.; Greenberg, Tsafrir; Carlson, Joshua M.	Neural correlates of aversive anticipation: An activation likelihood estimate meta-analysis across multiple sensory modalities	COGNITIVE AFFECTIVE & BEHAVIORAL NEUROSCIENCE	19	6	1379	1390		10.3758/s13415-019-00747-7	2019	WOS:000511620000003
1	2.3.6	Boccia, Maddalena; Teghil, Alice; Guariglia, Cecilia	Looking into recent and remote past: Meta-analytic evidence for cortical reorganization of episodic autobiographical memories	NEUROSCIENCE AND BIOBEHAVIORAL REVIEWS	107		84	95		10.1016/j.neubiorev.2019.09.003	2019	WOS:000501388000009
1	2.3.6	Scarpazza, Cristina; Lattanzi, Guido Maria; Antoniades, Mathilde; Di Fabio, Fabio; Sartori, Giuseppe; Eickhoff, Simon B.; McGuire, Philip; Tognin, Stefania	Systematic review and multi-modal meta-analysis of magnetic resonance imaging findings in 22q11.2 deletion syndrome: Is more evidence needed?	NEUROSCIENCE AND BIOBEHAVIORAL REVIEWS	107		143	153		10.1016/j.neubiorev.2019.09.004	2019	WOS:000501388000014
1	2.3.6	Chen, Yu; Kumfor, Fiona; Landin-Romero, Ramon; Irish, Muireann; Piguet, Olivier	The Cerebellum in Frontotemporal Dementia: a Meta-Analysis of Neuroimaging Studies	NEUROPSYCHOLOGY REVIEW	29	4	450	464		10.1007/s11065-019-09414-7	2019	WOS:000519674700003
1	2.3.6	Yeung, Andy W. K.	Morphometric and functional connectivity changes in the brain of patients with obstructive sleep apnea: A meta-analysis	JOURNAL OF SLEEP RESEARCH	28	6			e12857	10.1111/jsr.12857	2019	WOS:000495679200029
2	?	Alam, Tirso Rene del Jesus Gonzalez; Karapanagiotidis, Theodoros; Smallwood, Jonathan; Jefferies, Elizabeth	Degrees of lateralisation in semantic cognition: Evidence from intrinsic connectivity	NEUROIMAGE	202				116089	10.1016/j.neuroimage.2019.116089	2019	WOS:000491861000027
3	?	Wang, Wenzhao; Xie, Wei; Zhang, Qianqian; Liu, Lei; Liu, Jian; Zhou, Song; Shi, Jixue; Chen, Jianan; Ning, Bin	Reorganization of the brain in spinal cord injury: a meta-analysis of functional MRI studies	NEURORADIOLOGY	61	11	1309	1318		10.1007/s00234-019-02272-3	2019	WOS:000503025800011
1,19	GingerALE: 2.3.6; CluB: ?	Berlingeri, Manuela; Devoto, Francantonio; Gasparini, Francesca; Saibene, Aurora; Corchs, Silvia E.; Clemente, Lucia; Danelli, Laura; Gallucci, Marcello; Borgoni, Riccardo; Borghese, Nunzio Alberto; Paulesu, Eraldo	Clustering the Brain With "CluB": A New Toolbox for Quantitative Meta-Analysis of Neuroimaging Data	FRONTIERS IN NEUROSCIENCE	13				1037	10.3389/fnins.2019.01037	2019	WOS:000496458100001
4	?	Brandl, Felix; Corbi, Zarah Le Houcq; Bratec, Satja Mulej; Sorg, Christian	Cognitive reward control recruits medial and lateral frontal cortices, which are also involved in cognitive emotion regulation: A coordinate-based meta-analysis of fMRI studies	NEUROIMAGE	200		659	673		10.1016/j.neuroimage.2019.07.008	2019	WOS:000481579300057
1	2.3.6	Siman-Tov, Tali; Granot, Roni Y.; Shany, Ofir; Singer, Neomi; Hendler, Talma; Gordon, Carlos R.	Is there a <i>prediction network</i>? Meta-analytic evidence for a cortical-subcortical network likely subserving prediction	NEUROSCIENCE AND BIOBEHAVIORAL REVIEWS	105		262	275		10.1016/j.neubiorev.2019.08.012	2019	WOS:000487573500024
3	?	Potvin, Stephan; Gamache, Lydia; Lungu, Ovidiu	A Functional Neuroimaging Meta-Analysis of Self-Related Processing in Schizophrenia	FRONTIERS IN NEUROLOGY	10				990	10.3389/fneur.2019.00990	2019	WOS:000485185800001
1	2.3.6	Zinchenko, Oksana	Brain responses to social punishment: a meta-analysis	SCIENTIFIC REPORTS	9				12800	10.1038/s41598-019-49239-1	2019	WOS:000483920000012
1	2.3.6	Yang, Zhong; Zheng, Ya; Yang, Guochun; Li, Qi; Liu, Xun	Neural signatures of cooperation enforcement and violation: a coordinate-based meta-analysis	SOCIAL COGNITIVE AND AFFECTIVE NEUROSCIENCE	14	9	919	931		10.1093/scan/nsz073	2019	WOS:000517167200001
1	2.3.6	Busler, Jessica N.; Yanes, Julio A.; Bird, Ryan T.; Reid, Meredith A.; Robinson, Jennifer L.	Differential functional patterns of the human posterior cingulate cortex during activation and deactivation: a meta-analytic connectivity model	EXPERIMENTAL BRAIN RESEARCH	237	9	2367	2385		10.1007/s00221-019-05595-y	2019	WOS:000478671900020
1	2.3.6	King, Michael; Carnahan, Heather	Revisiting the brain activity associated with innocuous and noxious cold exposure	NEUROSCIENCE AND BIOBEHAVIORAL REVIEWS	104		197	208		10.1016/j.neubiorev.2019.06.021	2019	WOS:000483640500020
3	5.141	Pico-Perez, M.; Alemany-Navarro, M.; Dunsmoor, J. E.; Radua, J.; Albajes-Eizagirre, A.; Vervliet, B.; Cardoner, N.; Benet, O.; Harrison, B. J.; Soriano-Mas, C.; Fullana, M. A.	Common and distinct neural correlates of fear extinction and cognitive reappraisal: A meta-analysis of fMRI studies	NEUROSCIENCE AND BIOBEHAVIORAL REVIEWS	104		102	115		10.1016/j.neubiorev.2019.06.029	2019	WOS:000483640500012
1	2.3.6	Yu, Junhong; Tao, Qian; Zhang, Ruibin; Chan, Chetvvyn C. H.; Lee, Tatia M. C.	Can fMRI discriminate between deception and false memory? A meta-analytic comparison between deception and false memory studies	NEUROSCIENCE AND BIOBEHAVIORAL REVIEWS	104		43	55		10.1016/j.neubiorev.2019.06.027	2019	WOS:000483640500006
1	2.3.2	Mencarelli, Lucia; Neri, Francesco; Momi, Davide; Menardi, Arianna; Rossi, Simone; Rossi, Alessandro; Santarnecchi, Emiliano	Stimuli, presentation modality, and load-specific brain activity patterns during n-back task	HUMAN BRAIN MAPPING	40	13	3810	3831		10.1002/hbm.24633	2019	WOS:000478645900008
1	2.3.6	Johnson, Joseph F.; Belyk, Michel; Schwartze, Michael; Pinheiro, Ana P.; Kotz, Sonja A.	The role of the cerebellum in adaptation: ALE meta-analyses on sensory feedback error	HUMAN BRAIN MAPPING	40	13	3966	3981		10.1002/hbm.24681	2019	WOS:000478645900019
3	5.141	Zheng, Hui; Hu, Yanbo; Wang, Ziliang; Wang, Min; Du, Xiaoxia; Dong, Guangheng	Meta-analyses of the functional neural alterations in subjects with Internet gaming disorder: Similarities and differences across different paradigms	PROGRESS IN NEURO-PSYCHOPHARMACOLOGY & BIOLOGICAL PSYCHIATRY	94				109656	10.1016/j.pnpbp.2019.109656	2019	WOS:000475453200018
1	2.3.6	Wang, Haixia; Zhang, Jian; Jia, Huiyuan	Separate Neural Systems Value Prosocial Behaviors and Reward: An ALE Meta-Analysis	FRONTIERS IN HUMAN NEUROSCIENCE	13				276	10.3389/fnhum.2019.00276	2019	WOS:000481458900001
4	?	Darda, Kohinoor M.; Ramsey, Richard	The inhibition of automatic imitation: A meta-analysis and synthesis of fMRI studies	NEUROIMAGE	197		320	329		10.1016/j.neuroimage.2019.04.059	2019	WOS:000472161500029
1	3.0.2	Kim, Hongkeun	Neural activity during working memory encoding, maintenance, and retrieval: A network-based model and meta-analysis	HUMAN BRAIN MAPPING	40	17	4912	4933		10.1002/hbm.24747	2019	WOS:000479835600001
1	2.3.6	Jauniaux, Josiane; Khatibi, Ali; Rainville, Pierre; Jackson, Philip L.	A meta-analysis of neuroimaging studies on pain empathy: investigating the role of visual information and observers' perspective	SOCIAL COGNITIVE AND AFFECTIVE NEUROSCIENCE	14	8	789	813		10.1093/scan/nsz055	2019	WOS:000517160400001
1	2.3.6	Cocquyt, E. M.; Coffe, C.; van Mierlo, P.; Duyck, W.; Marien, P.; Szmalec, A.; Santens, P.; De Letter, M.	The involvement of subcortical grey matter in verbal semantic comprehension: A systematic review and meta-analysis of fMRI and PET studies	JOURNAL OF NEUROLINGUISTICS	51		278	296		10.1016/j.jneuroling.2019.04.001	2019	WOS:000471210700021
99		Gilat, Moran; Dijkstra, Bauke W.; D'Cruz, Nicholas; Nieuwboer, Alice; Lewis, Simon J. G.	Functional MRI to Study Gait Impairment in Parkinson's Disease: a Systematic Review and Exploratory ALE Meta-Analysis	CURRENT NEUROLOGY AND NEUROSCIENCE REPORTS	19	8			49	10.1007/s11910-019-0967-2	2019	WOS:000472040700001
1	2.3.6	Hawes, Zachary; Sokolowski, H. Moriah; Ononye, Chuka Bosah; Ansari, Daniel	Neural underpinnings of numerical and spatial cognition: An fMRI meta-analysis of brain regions associated with symbolic number, arithmetic, and mental rotation	NEUROSCIENCE AND BIOBEHAVIORAL REVIEWS	103		316	336		10.1016/j.neubiorev.2019.05.007	2019	WOS:000483424200023
1	2.3.6	Mothersill, David; Donohoe, Gary	Neural Effects of Cognitive Training in Schizophrenia: A Systematic Review and Activation Likelihood Estimation Meta-analysis	BIOLOGICAL PSYCHIATRY-COGNITIVE NEUROSCIENCE AND NEUROIMAGING	4	8	688	696		10.1016/j.bpsc.2019.03.005	2019	WOS:000494424900004
18	?	Javaheipour, Nooshin; Shandipour, Niloofar; Noori, Khadijeh; Zarei, Mojtaba; Camilleri, Julia A.; Laird, Angela R.; Fox, Peter T.; Eickhoff, Simon B.; Eickhoff, Claudia R.; Rosenzweig, Ivana; Khazaie, Habibolah; Tahmasian, Masoud	Functional brain alterations in acute sleep deprivation: An activation likelihood estimation meta-analysis	SLEEP MEDICINE REVIEWS	46		64	73		10.1016/j.smrv.2019.03.008	2019	WOS:000472501700007
1	2.3.6	Yaple, Zachary A.; Stevens, W. Dale; Arsalidou, Marie	Meta-analyses of the n-back working memory task: fMRI evidence of age-related changes in prefrontal cortex involvement across the adult lifespan	NEUROIMAGE	196		16	31		10.1016/j.neuroimage.2019.03.074	2019	WOS:000470833800002
1	2.3.7	Hammond, Christopher J.; Allick, Aliyah; Rahman, Naisa; Nanavati, Julie	Structural and Functional Neural Targets of Addiction Treatment in Adolescents and Young Adults: A Systematic Review and Meta-Analysis	JOURNAL OF CHILD AND ADOLESCENT PSYCHOPHARMACOLOGY	29	7	498	507		10.1089/cap.2019.0007	2019	WOS:000476021800001
1	2.3.6	Kim, Hongkeun	Neural correlates of explicit and implicit memory at encoding and retrieval: A unified framework and meta-analysis of functional neuroimaging studies	BIOLOGICAL PSYCHOLOGY	145		96	111		10.1016/j.biopsycho.2019.04.006	2019	WOS:000470090100010
1	2.3.6	Yaple, Zachary A.; Yu, Rongjun	Fractionating adaptive learning: A meta-analysis of the reversal learning paradigm	NEUROSCIENCE AND BIOBEHAVIORAL REVIEWS	102		85	94		10.1016/j.neubiorev.2019.04.006	2019	WOS:000472128000005
18	R2015a	Giehl, Kathrin; Tahmasian, Masoud; Eickhoff, Simon B.; van Eimeren, Thilo	Imaging executive functions in Parkinson's disease: An activation likelihood estimation meta-analysis	PARKINSONISM & RELATED DISORDERS	63		137	142		10.1016/j.parkreldis.2019.02.015	2019	WOS:000482247500022
2	5	Yuan, Rui; Biswal, Bharat B.; Zaborszky, Laszlo	Functional Subdivisions of Magnocellular Cell Groups in Human Basal Forebrain: Test-Retest Resting-State Study at Ultra-high Field, and Meta-analysis	CEREBRAL CORTEX	29	7	2844	2858		10.1093/cercor/bhy150	2019	WOS:000477708300006
3	?	Emch, Monica; von Bastian, Claudia C.; Koch, Kathrin	Neural Correlates of Verbal Working Memory: An fMRI Meta-Analysis	FRONTIERS IN HUMAN NEUROSCIENCE	13				180	10.3389/fnhum.2019.00180	2019	WOS:000471593300001
2	?	Kang, Yoona; Strecher, Victor J.; Kim, Eric; Falk, Emily B.	Purpose in Life and Conflict-Related Neural Responses During Health Decision-Making	HEALTH PSYCHOLOGY	38	6	545	552		10.1037/hea0000729	2019	WOS:000467925200009
2	?	Wang, Kai; Leopold, Daniel R.; Banich, Marie T.; Reineberg, Andrew E.; Willcutt, Erik G.; Cutting, Laurie E.; Del Tufo, Stephanie N.; Thompson, Lee A.; Opfer, John; Kanayet, Frank J.; Lu, Zhong-Lin; Petrill, Stephen A.	Characterizing and decomposing the neural correlates of individual differences in reading ability among adolescents with task-based fMRI	DEVELOPMENTAL COGNITIVE NEUROSCIENCE	37					10.1016/j.dcn.2019.100647	2019	WOS:000468888500015
18	?	Worringer, Britta; Langner, Robert; Koch, Iring; Eickhoff, Simon B.; Eickhoff, Claudia R.; Binkofski, Ferdinand C.	Common and distinct neural correlates of dual-tasking and task-switching: a meta-analytic review and a neuro-cognitive processing model of human multitasking	BRAIN STRUCTURE & FUNCTION	224	5	1845	1869		10.1007/s00429-019-01870-4	2019	WOS:000471236200011
1	2.3.6	Tagarelli, Kaitlyn M.; Shattuck, Kyle F.; Turkeltaub, Peter E.; Ullman, Michael T.	Language learning in the adult brain: A neuroanatomical meta-analysis of lexical and grammatical learning	NEUROIMAGE	193		178	200		10.1016/j.neuroimage.2019.02.061	2019	WOS:000463817100017
1	3	Ayoub, Lizbeth J.; Barnett, Alexander; Leboucher, Aziliz; Golosky, Mitchell; McAndrews, Mary Pat; Seminowicz, David A.; Moayedi, Massieh	The medial temporal lobe in nociception: a meta-analytic and functional connectivity study	PAIN	160	6	1245	1260		10.1097/j.pain.0000000000001519	2019	WOS:000480762400003
1	2.3	Wang, Hui; He, Weijiang; Wu, Jingting; Zhang, Junjun; Jin, Zhenlan; Li, Ling	A coordinate-based meta-analysis of the n-back working memory paradigm using activation likelihood estimation	BRAIN AND COGNITION	132		1	12		10.1016/j.bandc.2019.01.002	2019	WOS:000466826200001
99		Cargnelutti, Elise; Tomasino, Barbara; Fabbro, Franco	Language Brain Representation in Bilinguals With Different Age of Appropriation and Proficiency of the Second Language: A Meta-Analysis of Functional Imaging Studies	FRONTIERS IN HUMAN NEUROSCIENCE	13				154	10.3389/fnhum.2019.00154	2019	WOS:000468613600001
18	?	Gu, Ruolei; Huang, Wenhao; Camilleri, Julia; Xu, Pengfei; Wei, Ping; Eickhoff, Simon B.; Feng, Chunliang	Love is analogous to money in human brain: Coordinate-based and functional connectivity meta-analyses of social and monetary reward anticipation	NEUROSCIENCE AND BIOBEHAVIORAL REVIEWS	100		108	128		10.1016/j.neubiorev.2019.02.017	2019	WOS:000465050600009
99		Samea, Fateme; Soluki, Solmaz; Nejati, Vahid; Zarei, Mojtaba; Cortese, Samuele; Eickhoff, Simon B.; Tahmasian, Masoud; Eickhoff, Claudia R.	Brain alterations in children/adolescents with ADHD revisited: A neuroimaging meta-analysis of 96 structural and functional studies	NEUROSCIENCE AND BIOBEHAVIORAL REVIEWS	100		1	8		10.1016/j.neubiorev.2019.02.011	2019	WOS:000465050600001
3	?	Norman, Luke J.; Taylor, Stephan F.; Liu, Yanni; Radua, Joaquim; Chye, Yann; De Wit, Stella J.; Huyser, Chaim; Karahanoglu, F. Isik; Luks, Tracy; Manoach, Dara; Mathews, Carol; Rubia, Katya; Suo, Chao; van den Heuvel, Odile A.; Yucel, Murat; Fitzgerald, Kate	Error Processing and Inhibitory Control in Obsessive-Compulsive Disorder: A Meta-analysis Using Statistical Parametric Maps	BIOLOGICAL PSYCHIATRY	85	9	713	725		10.1016/j.biopsych.2018.11.010	2019	WOS:000464525200005
3	?	Wolters, Amee F.; van de Weijer, Sjors C. F.; Leentjens, Albert F. G.; Duits, Annelien A.; Jacobs, Heidi I. L.; Kuijf, Mark L.	Resting-state fMRI in Parkinson's disease patients with cognitive impairment: A meta-analysis	PARKINSONISM & RELATED DISORDERS	62		16	27		10.1016/j.parkreldis.2018.12.016	2019	WOS:000476961700004
3	4.31	Cattarinussi, Giulia; Di Giorgio, Annabella; Wolf, Robert Christian; Balestrieri, Matteo; Sambataro, Fabio	Neural signatures of the risk for bipolar disorder: A meta-analysis of structural and functional neuroimaging studies	BIPOLAR DISORDERS	21	3	215	227		10.1111/bdi.12720	2019	WOS:000467374700004
1	2.3.6	Celeghin, Alessia; Bagnis, Arianna; Diano, Matteo; Mendez, Carlos Andres; Costa, Tommaso; Tamietto, Marco	Functional neuroanatomy of blindsight revealed by activation likelihood estimation meta-analysis	NEUROPSYCHOLOGIA	128		109	118		10.1016/j.neuropsychologia.2018.06.007	2019	WOS:000493910900014
1	2.3.1	Lee, Moon-Soo; Anumagalla, Purnima; Talluri, Prasanth; Pavuluri, Mani N.	Attentional engagement increases inferior frontal gyrus activity and mutes limbic activity in pediatric bipolar disorder: Meta-analyses of fMRI studies	PROGRESS IN NEURO-PSYCHOPHARMACOLOGY & BIOLOGICAL PSYCHIATRY	91		14	19		10.1016/j.pnpbp.2018.05.011	2019	WOS:000461161200003
1	2.3.6	Gentili, Claudio; Messerotti Benvenuti, Simone; Lettieri, Giada; Costa, Cristiano; Cecchetti, Luca	ROI and phobias: The effect of ROI approach on an ALE meta-analysis of specific phobias	HUMAN BRAIN MAPPING	40	6	1814	1828		10.1002/hbm.24492	2019	WOS:000460987100011
1	2.3.6	Cona, Giorgia; Scarpazza, Cristina	Where is the "where" in the brain? A meta-analysis of neuroimaging studies on spatial cognition	HUMAN BRAIN MAPPING	40	6	1867	1886		10.1002/hbm.24496	2019	WOS:000460987100015
1	?	Seghezzi, Silvia; Zirone, Eleonora; Paulesu, Eraldo; Zapparoli, Laura	The Brain in (Willed) Action: A Meta-Analytical Comparison of Imaging Studies on Motor Intentionality and Sense of Agency	FRONTIERS IN PSYCHOLOGY	10				804	10.3389/fpsyg.2019.00804	2019	WOS:000464357300001
2	?	de Lacy, Nina; McCauley, Elizabeth; Kutz, J. Nathan; Calhoun, Vince D.	Multilevel Mapping of Sexual Dimorphism in Intrinsic Functional Brain Networks	FRONTIERS IN NEUROSCIENCE	13				332	10.3389/fnins.2019.00332	2019	WOS:000463609100001
15	BFMeta (old version)	Han, Hyemin; Park, Joonsuk	Bayesian meta-analysis of fMRI image data	COGNITIVE NEUROSCIENCE	10	2	66	76		10.1080/17588928.2019.1570103	2019	WOS:000458283500002
1	2.3.6	Berlingeri, Manuela; Magnani, Francesca Giulia; Salvato, Gerardo; Rosanova, Mario; Bottini, Gabriella	Neuroimaging Studies on Disorders of Consciousness: A Meta-Analytic Evaluation	JOURNAL OF CLINICAL MEDICINE	8	4			516	10.3390/jcm8040516	2019	WOS:000467500200101
3	?	Witteman, J.; Van IJzendoorn, M. H.; Rilling, J. K.; Bos, P. A.; Schiller, N. O.; Bakermans-Kranenburg, M. J.	Towards a neural model of infant cry perception	NEUROSCIENCE AND BIOBEHAVIORAL REVIEWS	99		23	32		10.1016/j.neubiorev.2019.01.026	2019	WOS:000461727700004
4	?	Brandl, Felix; Avram, Mihai; Weise, Benedikt; Shang, Jing; Simoes, Beatriz; Bertram, Teresa; Ayala, Daniel Hoffmann; Penzel, Nora; Guersel, Deniz A.; Baeuml, Josef; Wohlschlaeger, Afra M.; Vukadinovic, Zoran; Koutsouleris, Nikolaos; Leucht, Stefan; Sorg, Christian	Specific Substantial Dysconnectivity in Schizophrenia: A Transdiagnostic Multimodal Meta-analysis of Resting-State Functional and Structural Magnetic Resonance Imaging Studies	BIOLOGICAL PSYCHIATRY	85	7	573	583		10.1016/j.biopsych.2018.12.003	2019	WOS:000460728200013
99		Langner, Robert; Eickhoff, Simon B.; Bilalic, Merim	A network view on brain regions involved in experts' object and pattern recognition: Implications for the neural mechanisms of skilled visual perception	BRAIN AND COGNITION	131		74	86		10.1016/j.bandc.2018.09.007	2019	WOS:000462806500009
1	?	Paul, Sarika; Austin, Josie; Elliott, Rebecca; Ellison-Wright, Ian; Wan, Ming Wai; Drake, Richard; Downey, Darragh; Elmadih, Alya; Mukherjee, Ipshita; Heaney, Lisa; Williams, Steve; Abel, Kathryn M.	Neural pathways of maternal responding: systematic review and meta-analysis	ARCHIVES OF WOMENS MENTAL HEALTH	22	2	179	187		10.1007/s00737-018-0878-2	2019	WOS:000463840700001
1	2.3.6	Lau, Way K. W.; Leung, Mei-Kei; Lau, Benson W. M.	Resting-state abnormalities in Autism Spectrum Disorders: A meta-analysis	SCIENTIFIC REPORTS	9				3892	10.1038/s41598-019-40427-7	2019	WOS:000460508600122
4	?	Rigo, Paola; Kim, Pilyoung; Esposito, Gianluca; Putnick, Diane L.; Venuti, Paola; Bornstein, Marc H.	Specific maternal brain responses to their own child's face: An fMRI meta-analysis	DEVELOPMENTAL REVIEW	51		58	69		10.1016/j.dr.2018.12.001	2019	WOS:000459951300003
99		Zilberman, Noam; Lavidor, Michal; Yadid, Gal; Rassovsky, Yuri	Qualitative Review and Quantitative Effect Size Meta-Analyses in Brain Regions Identified by Cue-Reactivity Addiction Studies	NEUROPSYCHOLOGY	33	3	319	334		10.1037/neu0000526	2019	WOS:000459933100004
4	?	Sha, Zhiqiang; Wager, Tor D.; Mechelli, Andrea; He, Yong	Common Dysfunction of Large-Scale Neurocognitive Networks Across Psychiatric Disorders	BIOLOGICAL PSYCHIATRY	85	5	379	388		10.1016/j.biopsych.2018.11.011	2019	WOS:000457543700003
3	5.141	Schulze, Lars; Schulze, Andreas; Renneberg, Babette; Schmahl, Christian; Niedtfeld, Inga	Neural Correlates of Affective Disturbances: A Comparative Meta-analysis of Negative Affect Processing in Borderline Personality Disorder, Major Depressive Disorder, and Posttraumatic Stress Disorder	BIOLOGICAL PSYCHIATRY-COGNITIVE NEUROSCIENCE AND NEUROIMAGING	4	3	220	232		10.1016/j.bpsc.2018.11.004	2019	WOS:000494415200004
1	2.3.6	Saletin, Jared M.; Jackvony, Stephanie; Rodriguez, Katherina A.; Dickstein, Daniel P.	A coordinate-based meta-analysis comparing brain activation between attention deficit hyperactivity disorder and total sleep deprivation	SLEEP	42	3			zsy251	10.1093/sleep/zsy251	2019	WOS:000467166400016
2	?	Guo, Xiaonan; Duan, Xujun; Suckling, John; Chen, Heng; Liao, Wei; Cui, Qian; Chen, Huafu	Partially impaired functional connectivity states between right anterior insula and default mode network in autism spectrum disorder	HUMAN BRAIN MAPPING	40	4	1264	1275		10.1002/hbm.24447	2019	WOS:000459470400017
99		Poeppl, Timm B.; Donges, Maximilian R.; Mokros, Andreas; Rupprecht, Rainer; Fox, Peter T.; Laird, Angela R.; Bzdok, Danilo; Langguth, Berthold; Eickhoff, Simon B.	A view behind the mask of sanity: meta-analysis of aberrant brain activity in psychopaths	MOLECULAR PSYCHIATRY	24	3	463	470		10.1038/s41380-018-0122-5	2019	WOS:000459254400013
3	5.141	Hao, HuiHui; Chen, Chuang; Mao, WeiBing; Zhong, JianGuo; Dai, ZhenYu	Aberrant brain regional homogeneity in first-episode drug-naive patients with major depressive disorder: A voxel-wise meta-analysis	JOURNAL OF AFFECTIVE DISORDERS	245		63	71		10.1016/j.jad.2018.10.113	2019	WOS:000456697100008
3	5.15	Hao, HuiHui; Chen, Chuang; Mao, WeiBing; Xia, Wei; Yi, ZhongQuan; Zhao, PanWen; Pan, PingLei; Dai, ZhenYu	Alterations in resting-state local functional connectivity in obsessive-compulsive disorder	JOURNAL OF AFFECTIVE DISORDERS	245		113	119		10.1016/j.jad.2018.10.112	2019	WOS:000456697100013
1	2.3.6	Murphy, K. A.; Jogia, J.; Talcott, J. B.	On the neural basis of word reading: A meta-analysis of fMRI evidence using activation likelihood estimation	JOURNAL OF NEUROLINGUISTICS	49		71	83		10.1016/j.jneuroling.2018.08.005	2019	WOS:000453644800005
3	?	Huang, Xiao; Tang, Shi; Lyu, Xiaojun; Yang, Changqiang; Chen, Xiaoping	Structural and functional brain alterations in obstructive sleep apnea: a multimodal meta-analysis	SLEEP MEDICINE	54		195	204		10.1016/j.sleep.2018.09.025	2019	WOS:000458800800029
2	?	Huckins, Jeremy F.; Adeyemo, Babatunde; Miezin, Fran M.; Power, Jonathan D.; Gordon, Evan M.; Laumann, Timothy O.; Heatherton, Todd F.; Petersen, Steven E.; Kelley, William M.	Reward-related regions form a preferentially coupled system at rest	HUMAN BRAIN MAPPING; HUMAN BRAIN MAPPING	40	2	361	376		10.1002/hbm.24377	2019	WOS:000460481300001
1	2.3.6	Weber-Goericke, Fanny; Muehlhan, Markus	A quantitative meta-analysis of fMRI studies investigating emotional processing in excessive worriers: Application of activation likelihood estimation analysis	JOURNAL OF AFFECTIVE DISORDERS	243		348	359		10.1016/j.jad.2018.09.049	2019	WOS:000446860300045
1	2.3	Li, Yuan; Kong, Feng; Ji, Ming; Luo, Yangmei; Lan, Jijun; You, Xuqun	Shared and Distinct Neural Bases of Large- and Small-Scale Spatial Ability: A Coordinate-Based Activation Likelihood Estimation Meta-Analysis	FRONTIERS IN NEUROSCIENCE	12				1021	10.3389/fnins.2018.01021	2019	WOS:000455407100001
3	5.15	Kolesar, Tiffany A.; Bilevicius, Elena; Wilson, Alyssia D.; Kornelsen, Jennifer	Systematic review and meta-analyses of neural structural and functional differences in generalized anxiety disorder and healthy controls using magnetic resonance imaging	NEUROIMAGE-CLINICAL	24				102016	10.1016/j.nicl.2019.102016	2019	WOS:000504663800126
1	2.3.6	Henssen, Dylan; Dijk, Jurriaan; Knepfle, Robin; Sieffers, Matthijs; Winter, Anouk; Vissers, Kris	Alterations in grey matter density and functional connectivity in trigeminal neuropathic pain and trigeminal neuralgia: A systematic review and meta-analysis	NEUROIMAGE-CLINICAL	24				102039	10.1016/j.nicl.2019.102039	2019	WOS:000504663800009
3	?	Eyler, Lisa T.; Elman, Jeremy A.; Hatton, Sean N.; Gough, Sarah; Mischel, Anna K.; Hagler, Donald J.; Franz, Carol E.; Docherty, Anna; Fennema-Notestine, Christine; Gillespie, Nathan; Gustayson, Daniel; Lyons, Michael J.; Neale, Michael C.; Panizzon, Matthew S.; Dale, Anders M.; Kremen, William S.	Resting State Abnormalities of the Default Mode Network in Mild Cognitive Impairment: A Systematic Review and Meta-Analysis	JOURNAL OF ALZHEIMERS DISEASE	70	1	107	120		10.3233/JAD-180847	2019	WOS:000473652200011
1	2.3.6	Morriss, Jayne; Gell, Martin; van Reekum, Carien M.	The uncertain brain: A co-ordinate based meta-analysis of the neural signatures supporting uncertainty during different contexts	NEUROSCIENCE AND BIOBEHAVIORAL REVIEWS	96		241	249		10.1016/j.neubiorev.2018.12.013	2019	WOS:000457657300019
22		Samartsidis, Pantelis; Eickhoff, Claudia R.; Eickhoff, Simon B.; Wager, Tor D.; Barrett, Lisa Feldman; Atzil, Shir; Johnson, Timothy D.; Nichols, Thomas E.	Bayesian log-Gaussian Cox process regression: applications to meta-analysis of neuroimaging working memory studies	JOURNAL OF THE ROYAL STATISTICAL SOCIETY SERIES C-APPLIED STATISTICS	68	1	217	234		10.1111/rssc.12295	2019	WOS:000453687800011
1	2.3.6	Xiong, Ruo-Chu; Fu, Xin; Wu, Li-Zhen; Zhang, Cheng-Han; Wu, Hong-Xiang; Shi, Yu; Wu, Wen	Brain pathways of pain empathy activated by pained facial expressions: a meta-analysis of fMRI using the activation likelihood estimation method	NEURAL REGENERATION RESEARCH	14	1	172	178		10.4103/1673-5374.243722	2019	WOS:000451333500030
1	2.3.6	Powers, John P.; LaBar, Kevin S.	Regulating emotion through distancing: A taxonomy, neurocognitive model, and supporting meta-analysis	NEUROSCIENCE AND BIOBEHAVIORAL REVIEWS	96		155	173		10.1016/j.neubiorev.2018.04.023	2019	WOS:000457657300012
3	?	Blest-Hopley, Grace; Giampietro, Vincent; Bhattacharyya, Sagnik	Regular cannabis use is associated with altered activation of central executive and default mode networks even after prolonged abstinence in adolescent users: Results from a complementary meta-analysis	NEUROSCIENCE AND BIOBEHAVIORAL REVIEWS	96		45	55		10.1016/j.neubiorev.2018.10.026	2019	WOS:000457657300005
1	2.3.6	Teghil, Alice; Boccia, Maddalena; D'Antonio, Fabrizia; Di Vita, Antonella; de Lena, Carlo; Guariglia, Cecilia	Neural substrates of internally-based and externally-cued timing: An activation likelihood estimation (ALE) meta-analysis of fMRI studies	NEUROSCIENCE AND BIOBEHAVIORAL REVIEWS	96		197	209		10.1016/j.neubiorev.2018.10.003	2019	WOS:000457657300015
1	2.3.6	Zhang, Han; Wee, Chong-Yaw; Poh, Joann S.; Wang, Qiang; Shek, Lynette P.; Chong, Yap-Seng; Fortier, Marielle V.; Meaney, Michael J.; Broekman, Birit F. P.; Qiu, Anqi	Fronto-parietal numerical networks in relation with early numeracy in young children	BRAIN STRUCTURE & FUNCTION	224	1	263	275		10.1007/s00429-018-1774-2	2019	WOS:000458286500018
18	?	Wong, Ting Yat; Sid, Azah; Wensing, Tobias; Eickhoff, Simon B.; Habel, Ute; Gur, Ruben C.; Nickl-Jockschat, Thomas	Neural networks of aggression: ALE meta-analyses on trait and elicited aggression	BRAIN STRUCTURE & FUNCTION	224	1	133	148		10.1007/s00429-018-1765-3	2019	WOS:000458286500009
3	4.31	Cutler, Jo; Campbell-Meiklejohn, Daniel	A comparative fMRI meta-analysis of altruistic and strategic decisions to give	NEUROIMAGE	184		227	241		10.1016/j.neuroimage.2018.09.009	2019	WOS:000449385000020
1	2.3.6	Roberts C.A.; Giesbrecht T.; Stancak A.; Fallon N.; Thomas A.; Kirkham T.C.	Where Is Itch Represented in the Brain, and How Does it Differ from Pain? An Activation Likelihood Estimation Meta-Analysis of Experimentally-Induced Itch	Journal of Investigative Dermatology	139	10	2245	2248000		10.1016/j.jid.2019.04.007	2019	2-s2.0-85067844362
3	5.12	Mihaescu A.S.; Masellis M.; Graff-Guerrero A.; Kim J.; Criaud M.; Cho S.S.; Ghadery C.; Valli M.; Strafella A.P.	Brain degeneration in Parkinson’s disease patients with cognitive decline: a coordinate-based meta-analysis	Brain Imaging and Behavior	13	4	1021	1034		10.1007/s11682-018-9922-0	2019	2-s2.0-85049581055
3	?	Amad A.; Radua J.; Vaiva G.; Williams S.C.; Fovet T.	Similarities between borderline personality disorder and post traumatic stress disorder: Evidence from resting-state meta-analysis	Neuroscience and Biobehavioral Reviews	105		52	59		10.1016/j.neubiorev.2019.07.018	2019	2-s2.0-85070194556
1	2.3.6	Walenski M.; Europa E.; Caplan D.; Thompson C.K.	Neural networks for sentence comprehension and production: An ALE-based meta-analysis of neuroimaging studies	Human Brain Mapping	40	8	2275	2304		10.1002/hbm.24523	2019	2-s2.0-85060783711
1	2.3.6	Mitricheva E.; Kimura R.; Logothetis N.K.; Noori H.R.	Neural substrates of sexual arousal are not sex dependent	Proceedings of the National Academy of Sciences of the United States of America	116	31	15671	15676		10.1073/pnas.1904975116	2019	2-s2.0-85070621209
1	2.3.6	Gu L.; Zhang Z.	Exploring Structural and Functional Brain Changes in Mild Cognitive Impairment: A Whole Brain ALE Meta-Analysis for Multimodal MRI	ACS Chemical Neuroscience	10	6	2823	2829		10.1021/acschemneuro.9b00045	2019	2-s2.0-85066883726
1	2.3.6	Schüller C.B.; Kuhn J.; Jessen F.; Hu X.	Neuronal correlates of delay discounting in healthy subjects and its implication for addiction: an ALE meta-analysis study	American Journal of Drug and Alcohol Abuse	45	1	51	66		10.1080/00952990.2018.1557675	2019	2-s2.0-85061833714
1	2.3	Harvie C.; Weissbart S.J.; Kadam-Halani P.; Rao H.; Arya L.A.	Brain activation during the voiding phase of micturition in healthy adults: A meta-analysis of neuroimaging studies	Clinical Anatomy	32	1	13	19		10.1002/ca.23244	2019	2-s2.0-85056174323
1	?	Arioli M.; Canessa N.	Neural processing of social interaction: Coordinate-based meta-analytic evidence from human neuroimaging studies	Human Brain Mapping	40	13	3712	3737		10.1002/hbm.24627	2019	2-s2.0-85065746584
3	5.141	Wang X.; Luo Q.; Tian F.; Cheng B.; Qiu L.; Wang S.; He M.; Wang H.; Duan M.; Jia Z.	Brain grey-matter volume alteration in adult patients with bipolar disorder under different conditions: A voxel-based meta-analysis	Journal of Psychiatry and Neuroscience	44	2	89	101		10.1503/jpn.180002	2019	2-s2.0-85064196314
1	2.3.6	Yeung A.W.K.; Goto T.K.; Leung W.K.	Brain responses to stimuli mimicking dental treatment among non-phobic individuals: A meta-analysis	Oral Diseases	25	1	34	43		10.1111/odi.12819	2019	2-s2.0-85041448713
3	5.142	Klaming R.; Harlé K.M.; Infante M.A.; Bomyea J.; Kim C.; Spadoni A.D.	Shared gray matter reductions across alcohol use disorder and posttraumatic stress disorder in the anterior cingulate cortex: A dual meta-analysis	Neurobiology of Stress	10				100132	10.1016/j.ynstr.2018.09.009	2019	2-s2.0-85057610387

## Sheet: software category
Software classification code	Software name	Meta-analytic category: 1=CBMA; 2=IBMA; 3=Both CBMA & IBMA; 4=General meta-analysis methods (non-specific to neuroimaging meta-analysis)
1	GingerALE	1
2	Neurosynth (website)	1
3	SDM-PSI toolbox	3
4	MKDA toolbox	1
5	NiMARE	3
6	NeuroElf	1
7	R	4
8	RevMan	4
9	Meta-Essentials	4
10	NeuroQuery (website)	1
11	Comprehensive Meta-Analysis	4
12	FSL	4
13	Excel extension	4
14	STATA	4
15	BayesFactorFMRI toolbox	2
16	NeuRoi toolbox	1
17	Script for Author-topic model (ATM, Ngo et al. 2019)	1
18	Matlab	4
19	CluB toolbox	1
20	BMACS toolbox	1
21	TIFT (Tensor Imaging and Fiber Tracking)	1
22	customized procedure	NA
23	PythonMeta	4
24	LinkRdata	3
